# Supplementary material for: Colorimetric detection of fluoride ions in aqueous medium using thiourea derivatives: a transition metal ion assisted approach
Source: Royal Society of Chemistry journal article supplement (doi:10.1039/d1dt02173g), 2021-01-01
Supplement: d1dt02173g1.pdf [file d1dt02173g1.pdf]

## Electronic Supplementary Information (ESI)

Rituraj Das,<sup>a</sup> Dhrubajyoti Talukdar,<sup>a</sup> Plaban J. Sarma,<sup>a</sup> Hemrupa Kuilya,<sup>b</sup> Ranjit Thakuria<sup>c</sup>, Diganta Choudhury\*<sup>b</sup> and Sanjeev P. Mahanta\*<sup>a</sup>

<sup>a</sup>Department of Chemical Sciences, Tezpur University, Tezpur, Assam, India.

<sup>b</sup>Department of Chemistry, B. Borooah College, Guwahati - 781007, Assam, India.

<sup>c</sup>Department of Chemistry, Gauhati University, Guwahati - 781014, Assam, India.

Email: [digantachoudhury2008@gmail.com](mailto:digantachoudhury2008@gmail.com), [spm@tezu.ernet.in](mailto:spm@tezu.ernet.in)

# Colorimetric detection of fluoride ion in aqueous medium by thiourea derivatives: a transition metal ion assisted approach

## General Methods

Instrumentation and reagents: All reagents and solvents were obtained from commercial sources and used as received, without further purification. All tetrabutylammonium salts for anion screening experiments were purchased from Sigma-Aldrich® and used as such. Infrared spectra were recorded with a Perkin Elmer Frontier MIRFIR spectrometer.

HRMS data were recorded by electron spray ionization with a Q-TOF mass analyzer. The electrospray ionization mass spectrometry (ESI-MS) spectrum of the receptors was recorded in methanol in Shimadzu-LCMS-2010 mass spectrometer. The <sup>1</sup>H NMR spectra (400 MHz) and <sup>13</sup>C NMR spectra (100 MHz) were recorded on a 'JEOL' NMR spectrophotometer in DMSO-*d*<sub>6</sub> at room temperature. In NMR spectra, chemical shifts are reported in parts per million (ppm) downfield of Me<sub>4</sub>Si (TMS) as internal standard. EPR analysis was carried out with JEOL, Model: JES-FA200 spectrometer. 2D-NMR experiments (COSY, NOESY, HSQC, HMBC NMR) were performed in a 'Bruker' 600 MHz NMR spectrophotometer.

Cyclic Voltammogram and Differential Pulse Voltammetry (DPV) were done using Bio-Logics SP-300 with EIS facility. UV-Vis experiments were performed with Shimadzu UV-2550 spectrophotometer. UV-Vis titrations were carried out in dimethyl sulfoxide solution. The receptor solutions were titrated by adding known quantities of concentrated solution of the anions in question. Cyclic voltammetry experiments were carried out in a standard three electrode apparatus with a platinum working electrode, Ag/Ag<sup>+</sup> (0.01 M AgNO<sub>3</sub> in 0.1 M TBAP in DMSO) reference electrode, and a Pt wire auxiliary electrode. The supporting electrolyte is 0.1 M tetrabutylammonium perchlorate (TBAP) in DMSO solution. The cell was maintained oxygen-free by purging dry nitrogen through the solution.

The limit of detection (LOD) value was calculated based on the anion titration of the developed probe under two conditions. To determine the S/N ratio, the absorbance of **C2** without the ion, F<sup>-</sup> was measured upto ten times and the standard deviation of blank measurements was determined. Similarly, to determine the S/N ratio presence of the metal ion, the absorbance of **C2**.Ni<sup>2+</sup>/Cu<sup>2+</sup> mixture without the presence of F<sup>-</sup> was measured ten times and the value was calculated. So the detection limit of **C2** and **C2**.Ni<sup>2+</sup>/Cu<sup>2+</sup> for F<sup>-</sup> were determined from the following equation:  $LOD = K \times S_b/S$  Where  $K = 2$  or  $3$  (we take  $2$  in this case);  $S_b$  is the standard deviation of the blank solution;  $S$  is the slope of the calibration curve.<sup>1</sup> The fluoride contaminated groundwater samples collected from Baghpani village (Coordinates: 26.286372, 93.001249), Karbi Anglong, Assam, India was used as such

## Synthesis and characterization

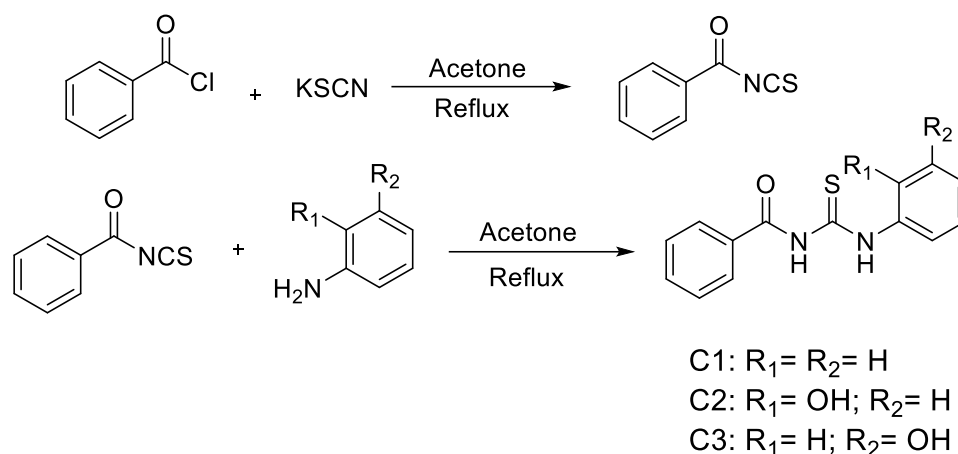

**Scheme S1:** Reaction scheme for the synthesis of **C1-C3**.

### Synthetic Procedure:

0.1 mol of Potassium thiocyanate was dissolved in acetone. To it, 0.1 mol of the acylating agent *i.e.* Benzoyl chloride was added slowly with constant shaking. The mixture was then refluxed for 15 min, cooled and filtered. To the filtrate, 0.1 mol of amine dissolved in acetone was slowly added and the mixture was shaken. The mixture was then refluxed for 10 min and thereafter acetone was removed by distillation. In a beaker containing crushed ice, the mixture was added slowly with constant stirring and the reagent was solidified. The crude reagent was filtered and recrystallized from ethanol. **C1**, **C2** and **C3** were characterized by FT-IR,<sup>1</sup>H and <sup>13</sup>C NMR.

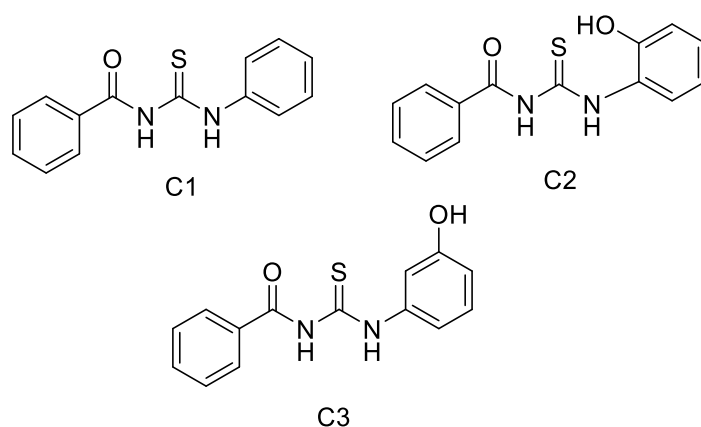

**Figure S1:** Structure of the receptors **C1-C3** chosen for the study.

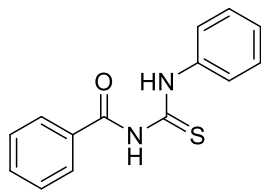

**C1:** White solid, Yield: 92%, FT-IR of **C1** ( $\text{cm}^{-1}$ ):  $\nu(\text{C}=\text{O}) = 1659$  and  $\nu(\text{C}=\text{S}) = 1533$ .  $^1\text{H}$  NMR of **C1** (400 MHz,  $\text{CDCl}_3$ ):  $\delta_{\text{H}}$  12.58 (s, 1H, NH), 11.53 (s, 1H, NH), 7.89 (d, 2H), 7.71 (d, 2H), 7.65 (t, 1H), 7.54 (t, 2H), 7.42 (t, 2H), 7.28 (t, 1H);  $^{13}\text{C}$  NMR (100 MHz,  $\text{CDCl}_3$ )  $\delta$  178.4, 167, 137.7, 133.8, 131.7, 129.3, 129, 127.5, 127, 124.2; HRMS  $m/z$  calculated for  $\text{C}_{14}\text{H}_{12}\text{N}_2\text{OS}$   $[\text{M} + \text{H}]^+$  257.0670, found 257.0929.

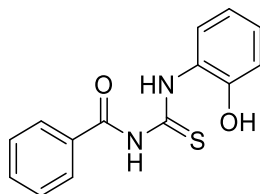

**C2:** Orange solid, Yield: 73%, FT-IR of **C2** ( $\text{cm}^{-1}$ ):  $\nu(\text{C}=\text{O}) = 1672$  and  $\nu(\text{C}=\text{S}) = 1527$ .  $^1\text{H}$  NMR of **C2** (400 MHz,  $\text{DMSO}-d_6$ ):  $\delta_{\text{H}}$  (ppm) 12.93 (s, 1H, NH), 11.45 (s, 1H, NH), 10.20 (s, 1H, OH), 8.51 (d, 1H), 7.94 (d, 2H), 7.63 (t, 1H), 7.50 (t, 2H), 7.04 (t, 1H), 6.92 (d, 1H), 6.81 (t, 1H);  $^{13}\text{C}$  NMR (100 MHz,  $\text{DMSO}-d_6$ )  $\delta$  178, 168.8, 149.4, 133.6, 132.7, 129.2, 128.9, 127, 126.4, 123.7, 118.8, 115.6; HRMS  $m/z$  calculated for  $\text{C}_{14}\text{H}_{12}\text{N}_2\text{O}_2\text{S}$   $[\text{M} + \text{H}]^+$  273.0619, found 273.0697.

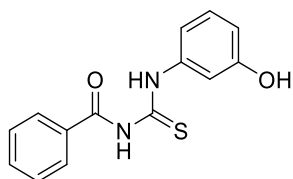

**C3:** Off white solid, Yield: 41%, FT-IR of **C3** ( $\text{cm}^{-1}$ ):  $\nu(\text{C}=\text{O}) = 1674$ ,  $\nu(\text{C}=\text{S}) = 1536$ .  $^1\text{H}$ -NMR of **C3** (400 MHz,  $\text{DMSO}-d_6$ ):  $\delta_{\text{H}}$  12.55 (s, 1H, NH), 11.48 (s, 1H, NH), 9.60 (s, 1H, OH), 7.94 (d, 2H), 7.62 (t, 1H), 7.50 (t, 2H), 7.25 (s, 1H), 7.17 (t, 1H), 7.02 (d, 1H), 6.64 (d, 1H);  $^{13}\text{C}$  NMR (100 MHz,  $\text{DMSO}-d_6$ )  $\delta$  179.1, 168.8, 158, 139.4, 133.6, 132.6, 130, 129.2, 128.9, 115, 113.9, 111.4; HRMS  $m/z$  calculated for  $\text{C}_{14}\text{H}_{12}\text{N}_2\text{O}_2\text{S}$   $[\text{M} + \text{H}]^+$  273.0619, found 273.0694.

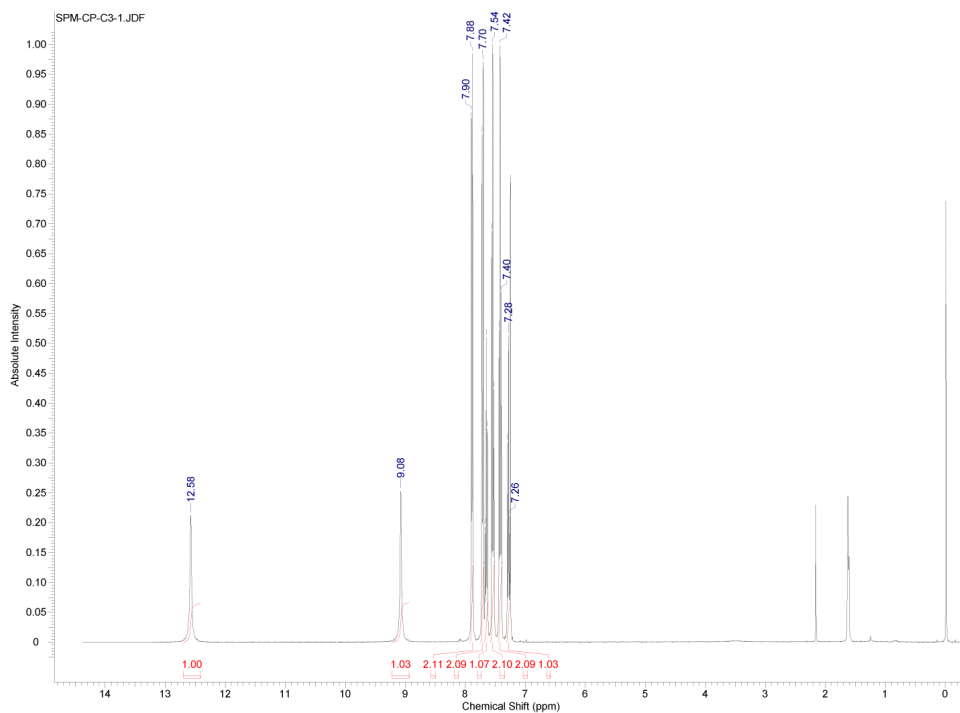

**Figure S2:**  $^1\text{H}$  NMR spectrum of **C1** ( $\text{CDCl}_3$ , 298 K)

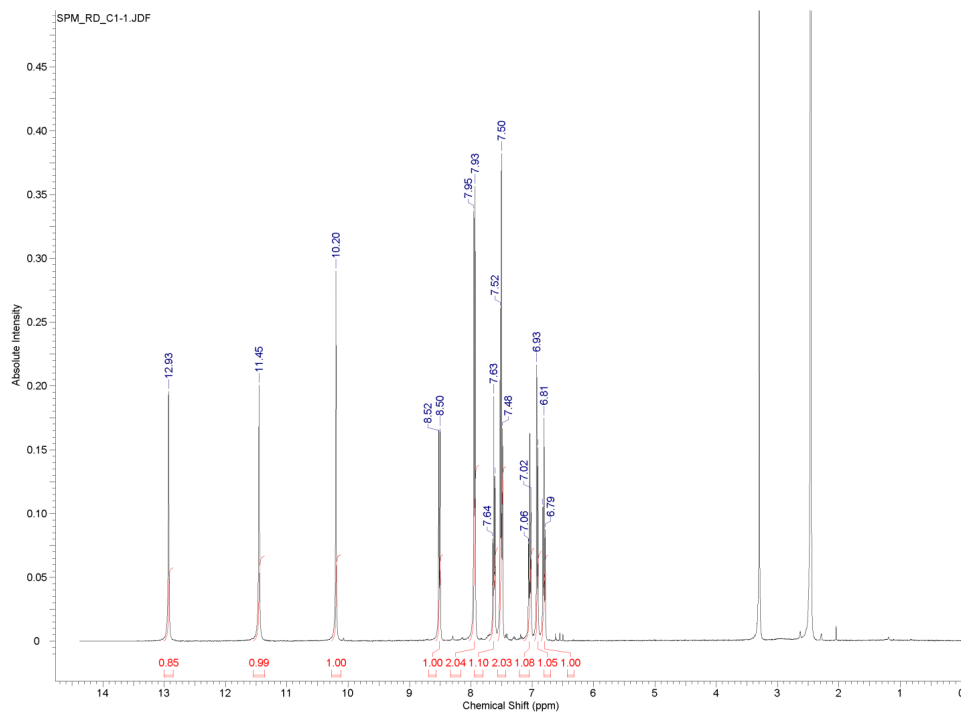

**Figure S3:**  $^1\text{H}$  NMR spectrum of **C2** ( $\text{DMSO}-d_6$ , 298 K).

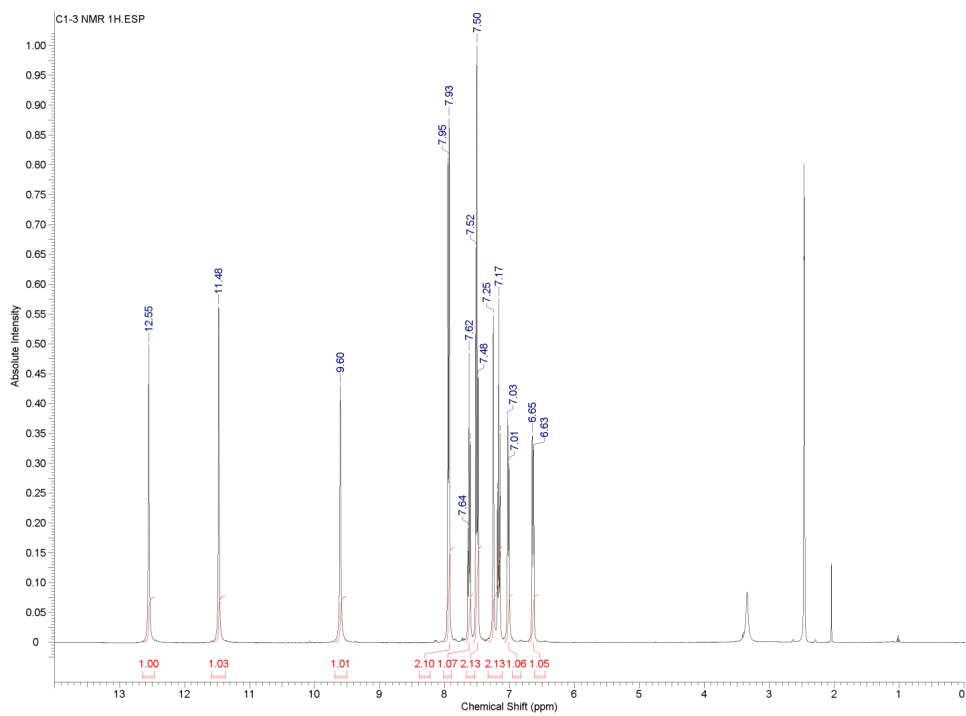

**Figure S4:** <sup>1</sup>H NMR spectrum of C3 (DMSO-*d*<sub>6</sub>, 298 K).

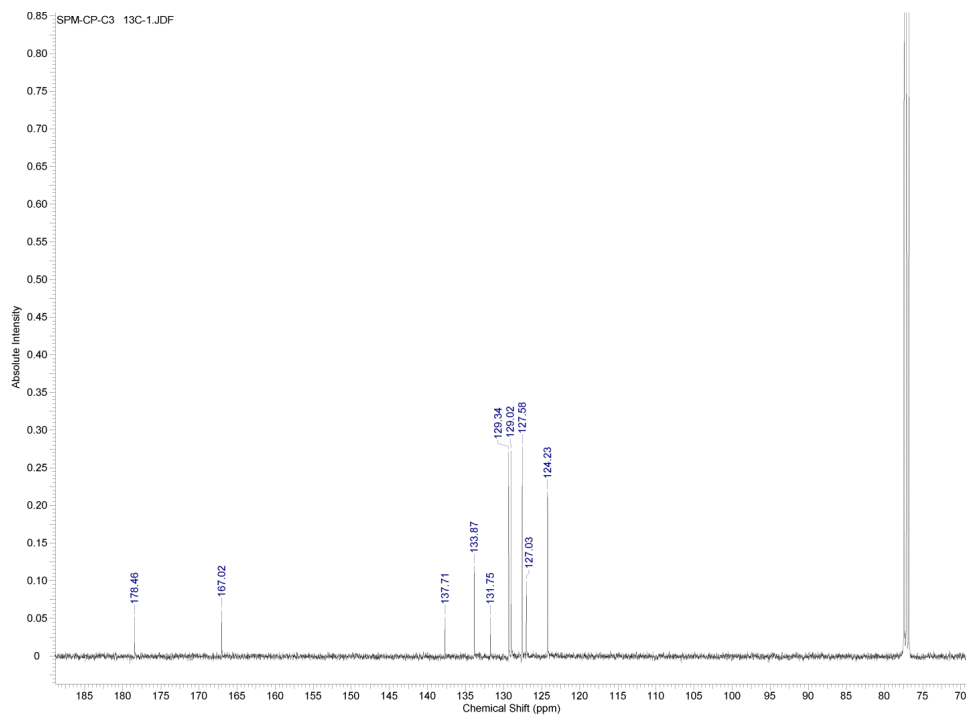

**Figure S5:** <sup>13</sup>C NMR spectrum of C1 (CDCl<sub>3</sub>, 298 K)

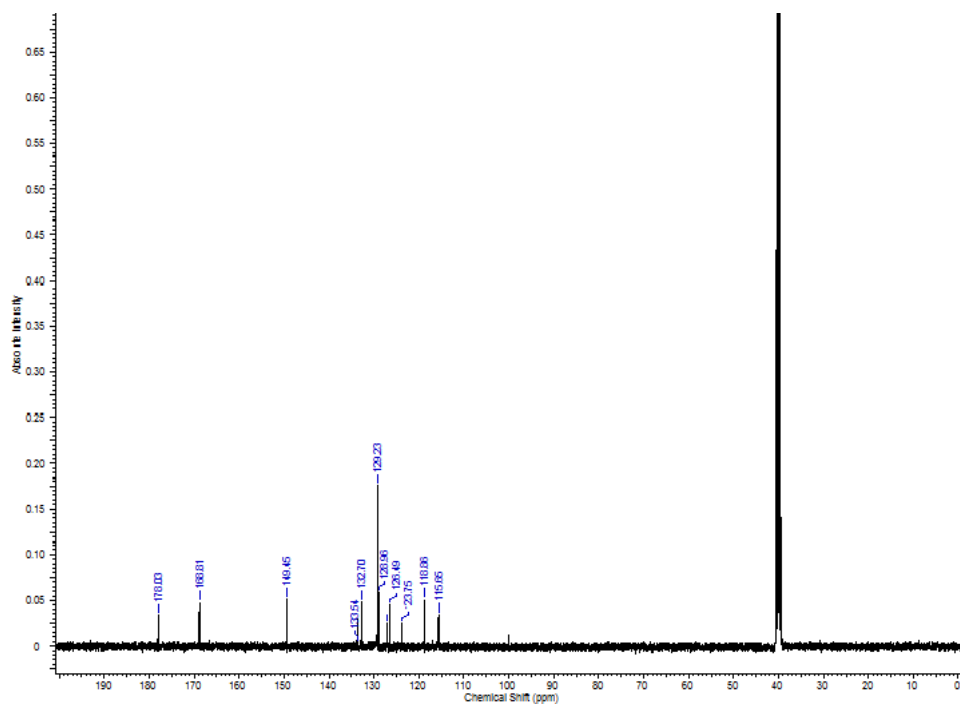

**Figure S6:**  $^{13}\text{C}$  NMR spectrum of C2 ( $\text{DMSO-}d_6$ , 298 K).

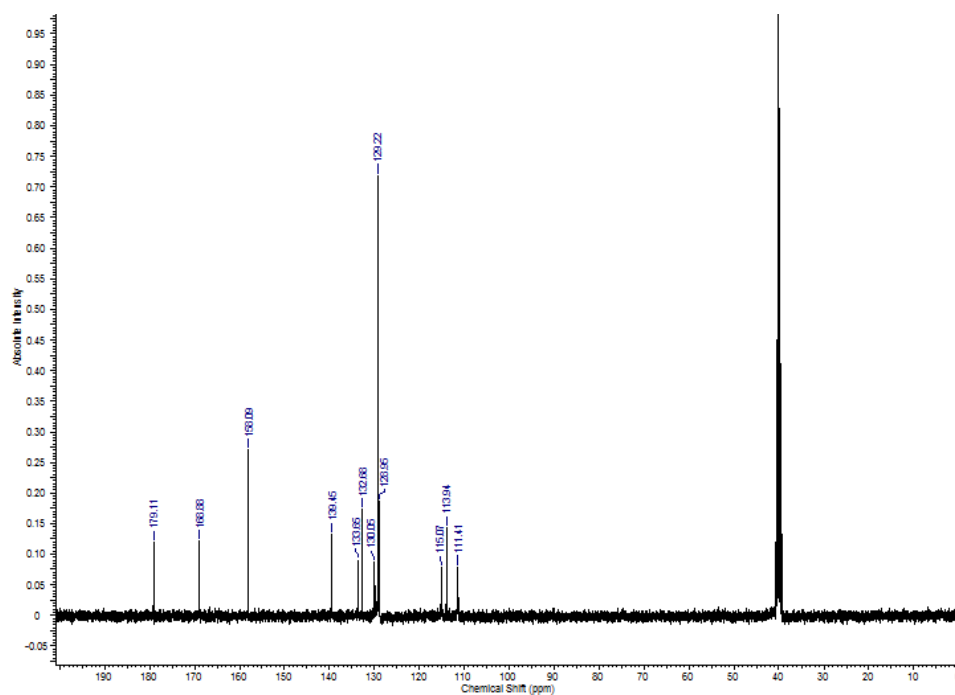

**Figure S7:**  $^{13}\text{C}$  NMR spectrum of C3 ( $\text{DMSO-}d_6$ , 298 K).

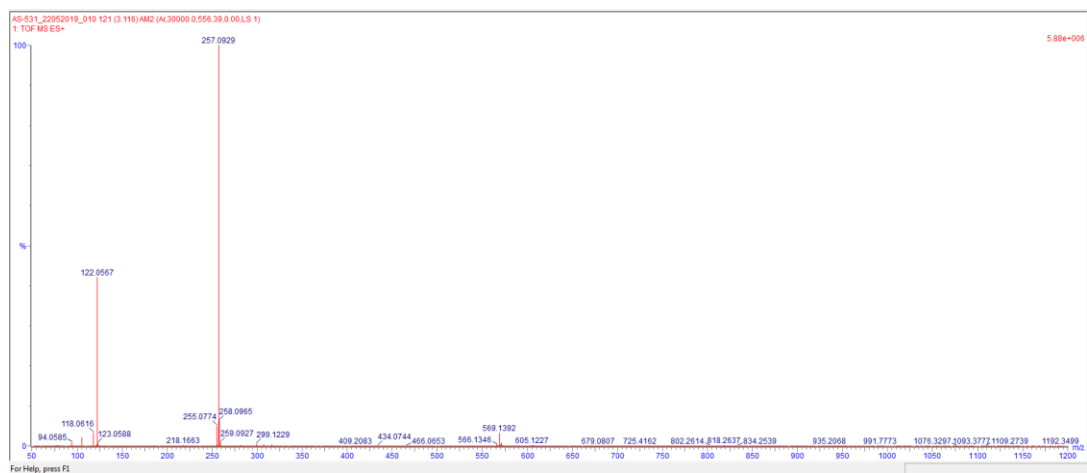

Figure S8: HRMS of C1

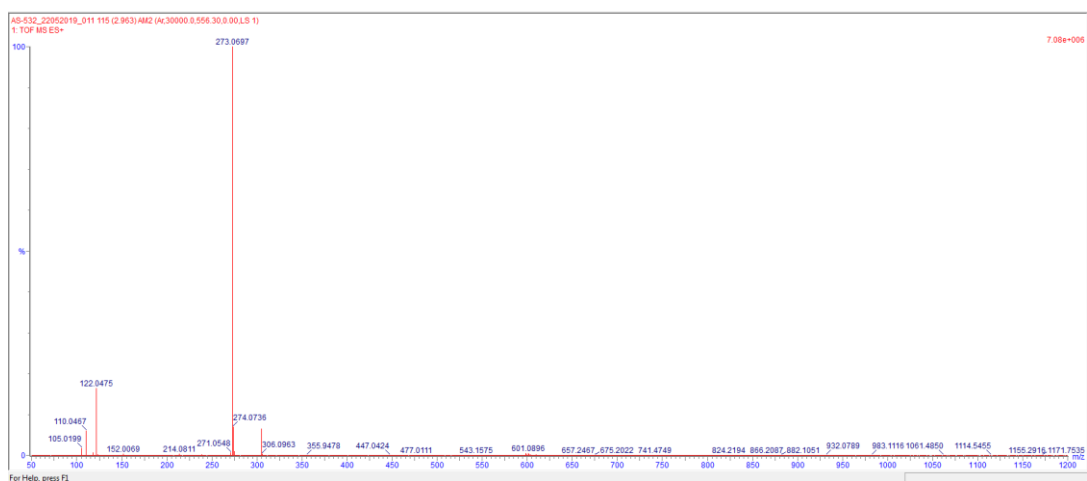

Figure S9: HRMS of C2

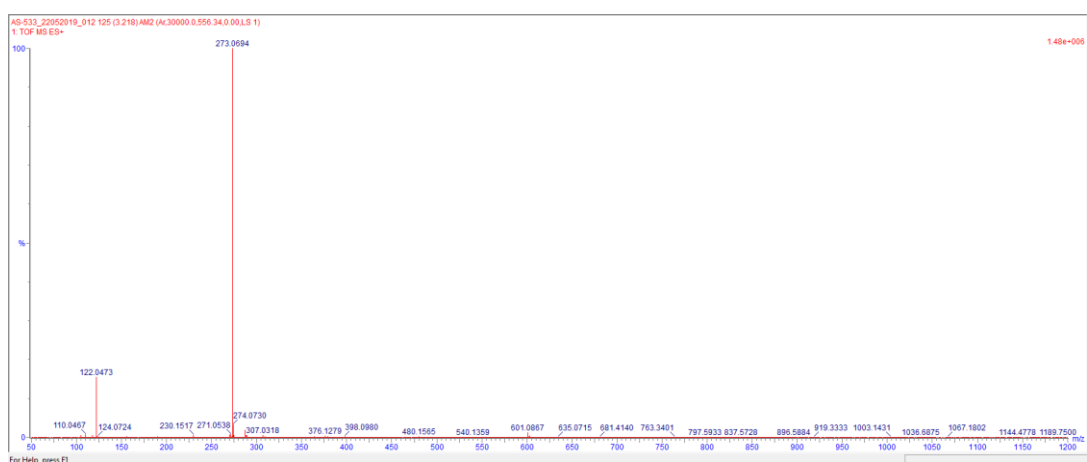

Figure S10: HRMS of C3



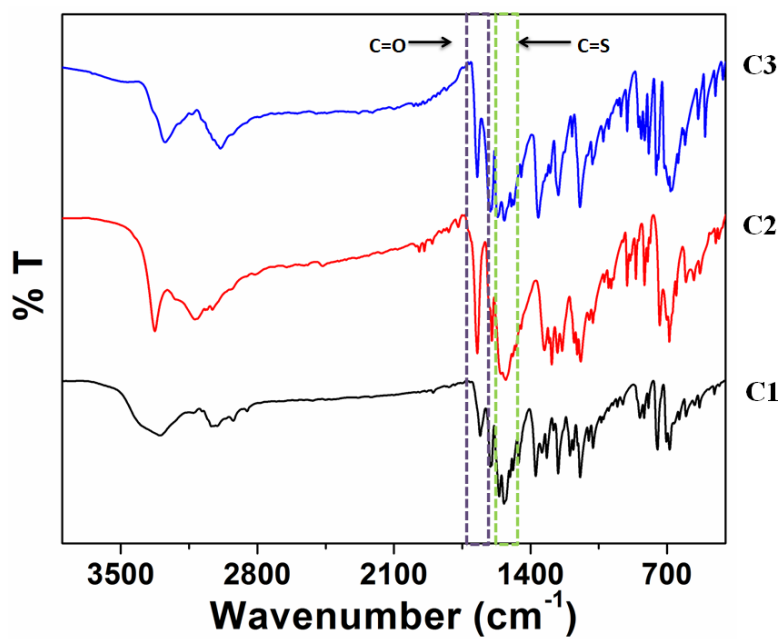

**Figure S11:** Stack plot of FT IR spectra for C1-C3. \*IR spectra measured as KBr discs

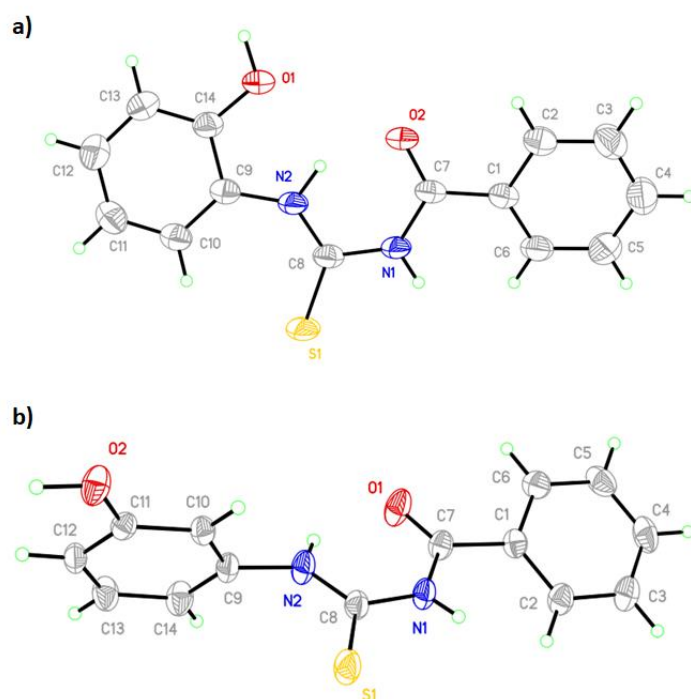

**Figure S12:** a) ORTEP diagram of C2 with 50% probability ellipsoid; b) ORTEP diagram of C3 with 50% probability ellipsoid

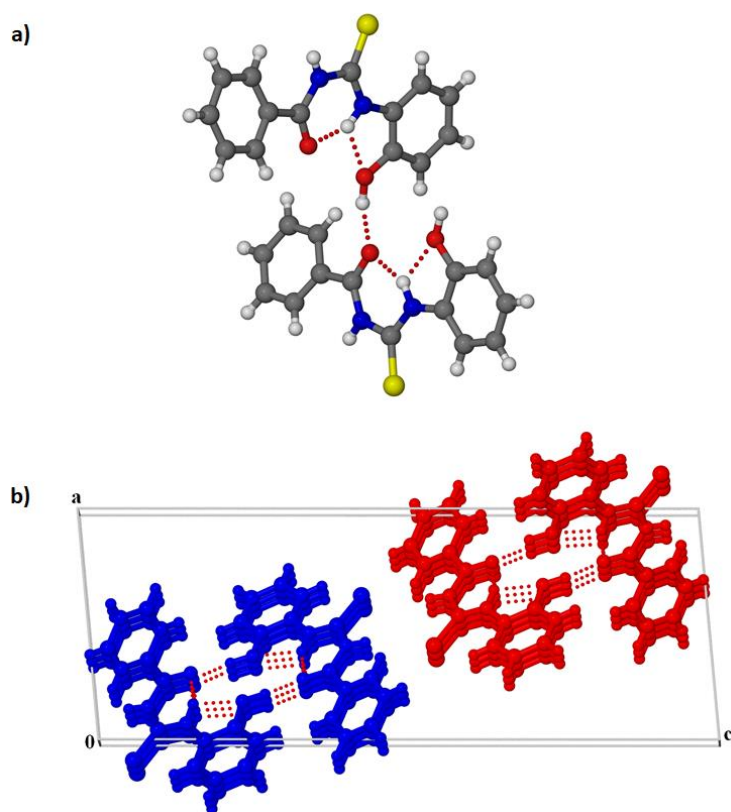

**Figure S13:** Packing diagram of **C2** viewed along *b* axis. The dashed lines indicate hydrogen bonds.

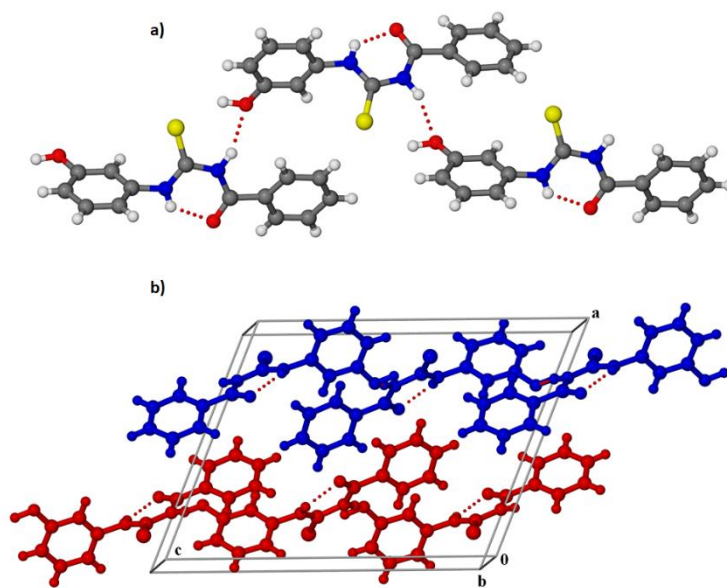

**Figure S14:** Packing diagram of **C3** viewed along *b* axis. The dashed lines indicate hydrogen bonds.

| Compound                                                   | C2                                                                                           | C3                                                                                           |
|------------------------------------------------------------|----------------------------------------------------------------------------------------------|----------------------------------------------------------------------------------------------|
| CCDC number                                                | 2065030                                                                                      | 2065031                                                                                      |
| Empirical formula                                          | C <sub>14</sub> H <sub>12</sub> N <sub>2</sub> O <sub>2</sub> S                              | C <sub>14</sub> H <sub>12</sub> N <sub>2</sub> O <sub>2</sub> S                              |
| Formula weight (g/mol)                                     | 272.32                                                                                       | 272.32                                                                                       |
| Temperature/K                                              | 296                                                                                          | 296                                                                                          |
| Crystal system                                             | Monoclinic                                                                                   | Monoclinic                                                                                   |
| Space group                                                | <i>P</i> 2 <sub>1</sub> /n                                                                   | <i>P</i> 2 <sub>1</sub> /c                                                                   |
| <i>a</i> /Å                                                | 9.7375(17)                                                                                   | 12.2027(10)                                                                                  |
| <i>b</i> /Å                                                | 5.1423(9)                                                                                    | 7.3419(6)                                                                                    |
| <i>c</i> /Å                                                | 25.972(5)                                                                                    | 15.7431(13)                                                                                  |
| $\alpha$ /°                                                | 90.00                                                                                        | 90.00                                                                                        |
| $\beta$ /°                                                 | 95.230(5)                                                                                    | 112.224(2)                                                                                   |
| $\gamma$ /°                                                | 90.00                                                                                        | 90.00                                                                                        |
| Volume/Å <sup>3</sup>                                      | 1295.1(4)                                                                                    | 1305.66(19)                                                                                  |
| Z                                                          | 4                                                                                            | 4                                                                                            |
| Density, $\rho_{\text{calc}}$ /cm <sup>3</sup>             | 1.397                                                                                        | 1.385                                                                                        |
| Absorption coefficient, $\mu$ /mm <sup>-1</sup>            | 0.249                                                                                        | 0.247                                                                                        |
| F(000)                                                     | 568                                                                                          | 568                                                                                          |
| Crystal size/mm <sup>3</sup>                               | 0.250 x 0.090 x 0.070                                                                        | 0.260 x 0.150 x 0.120                                                                        |
| Radiation                                                  | MoK $\alpha$ ( $\lambda$ = 0.71073 Å)                                                        | MoK $\alpha$ ( $\lambda$ = 0.71073 Å)                                                        |
| 2 $\Theta$ range for data collection/°                     | 4.040 to 25.025                                                                              | 1.803 to 25.022                                                                              |
| Index ranges                                               | -10 $\leq$ <i>h</i> $\leq$ 11, -6 $\leq$ <i>k</i> $\leq$ 6,<br>-30 $\leq$ <i>l</i> $\leq$ 30 | -14 $\leq$ <i>h</i> $\leq$ 14, -8 $\leq$ <i>k</i> $\leq$ 8,<br>-18 $\leq$ <i>l</i> $\leq$ 18 |
| Reflns. Collected                                          | 20726                                                                                        | 17381                                                                                        |
| Unique Reflns.                                             | 2257                                                                                         | 2284                                                                                         |
| Observed Reflns.                                           | 1579                                                                                         | 2014                                                                                         |
| Data/restraints/parameters                                 | 2257/1/184                                                                                   | 2284/1/184                                                                                   |
| Goodness-of-fit on F <sup>2</sup>                          | 1.025                                                                                        | 1.047                                                                                        |
| Final R indexes [ <i>I</i> $\geq$ 2 $\sigma$ ( <i>I</i> )] | R = 0.0418; wR = 0.1036                                                                      | R = 0.0344; wR = 0.0939                                                                      |
| Final R indexes [all data]                                 | R = 0.0659; wR = 0.1192                                                                      | R = 0.0395; wR = 0.0983                                                                      |

**Table S1:** The crystallographic parameters for compound C2 and C3.

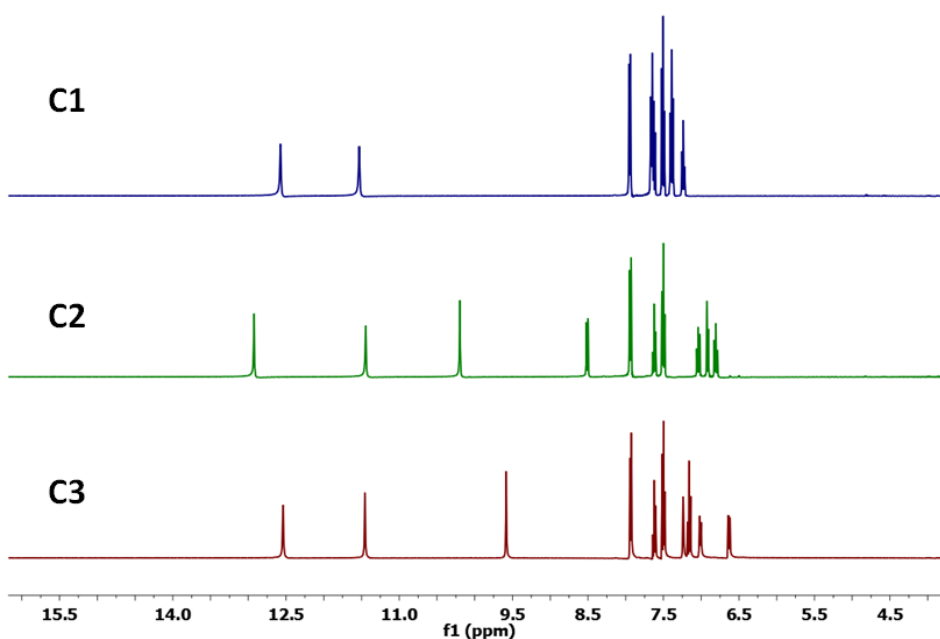

**Figure S15:** Stack plot for **C1-C3** recorded by  $^1\text{H}$  NMR spectroscopy ( $\text{DMSO-}d_6$ , 298 K).

## 2D NMR analysis

### For C2:

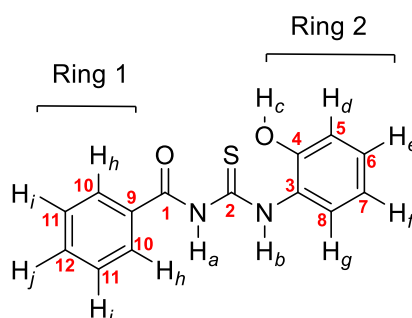

In the  $^1\text{H}$ -NMR spectrum of **C2**, we observed a doublet and two triplets at  $\delta$  7.94, 7.62 and 7.50 ppm for 2H, 1H and 2H respectively. As there is no other possibility for a doublet and triplet with integration value of 2H, so the signal at  $\delta$  7.94 and 7.50 ppm must be for  $\text{H}_h$  and  $\text{H}_i$  respectively. Additionally, a correlated spectroscopy (COSY) correlation is observed between triplets at  $\delta$  7.62 and 7.50 ppm, thereby pointing the triplet at  $\delta$  7.62 ppm for  $\text{H}_j$ . Based on the correlations observed in HSQC spectrum, the signals arising at  $\delta$  128.9, 133.6 and 129.2 can be assigned to C-10, C-12 and C-11 respectively. Furthermore, the  $^{13}\text{C}$ -NMR spectrum shows signals for C-1 and C-2 at  $\delta$  168.8 and 178 ppm respectively for

the C=O and C=S moiety. Moreover, in the HSQC spectrum we did not observe any correlations corresponding to the  $^{13}\text{C}$ -NMR signals at  $\delta$  149.4, 132.7 and 126.5 ppm, which gave us the impression that these signals might be either for C-4, C-9 or C-3 atom. The HMBC confirmed the signal at  $\delta$  132.7 ppm to be for the C-9 atom as it showed a correlation with the signal for  $\text{H}_i$  protons. In the aromatic region, C-4 being the highly deshielded carbon atom on being attached to the hydroxyl group can be assigned to signal appearing at  $\delta$  149.4, which does not show any correlation in HSQC spectrum but shows very good correlations with proton signal appearing at  $\delta$  8.51 ppm in HMBC. Similarly, the C-3 carbon atom can be assigned to the signal appearing at  $\delta$  126.6 ppm, which is further confirmed by the correlation observed in HMBC with the proton signal appearing at  $\delta$  6.32 ppm. Thus, the proton signal at  $\delta$  8.51 and 6.92 ppm can be assigned to  $\text{H}_g$  and  $\text{H}_d$  proton respectively. Likewise, the proton signal at  $\delta$  7.04 and 6.81 ppm show good HMBC correlation with C-4 and C-3 carbon atoms respectively, helping us to assign them for  $\text{H}_e$  and  $\text{H}_f$  protons.

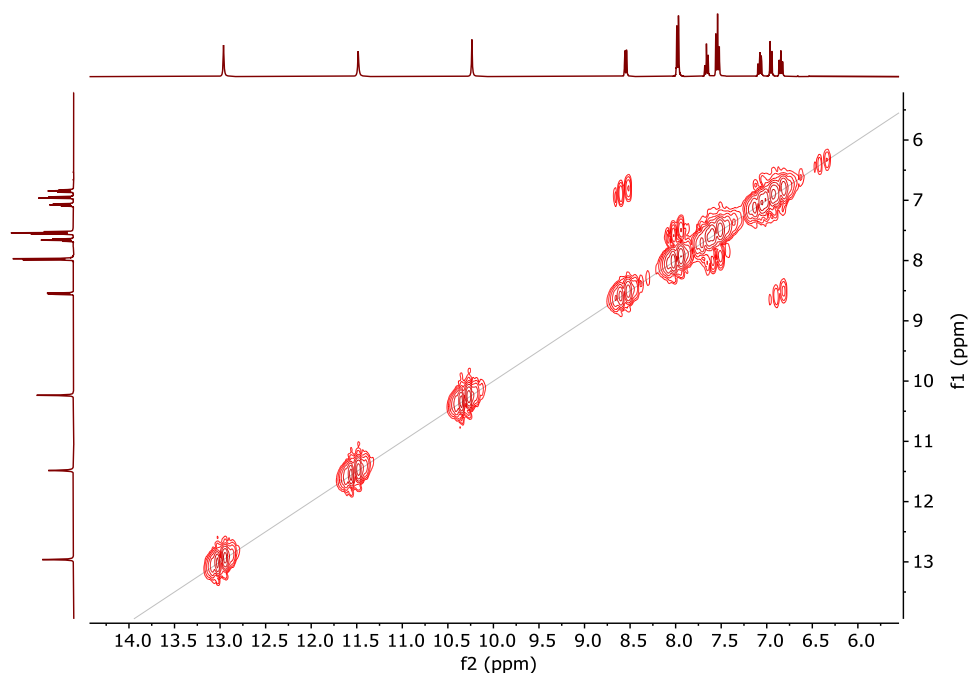

**Figure S16:**  $^1\text{H}$ - $^1\text{H}$  COSY-NMR (600 MHz) spectrum of complex **C2** in  $\text{DMSO-}d_6$ .

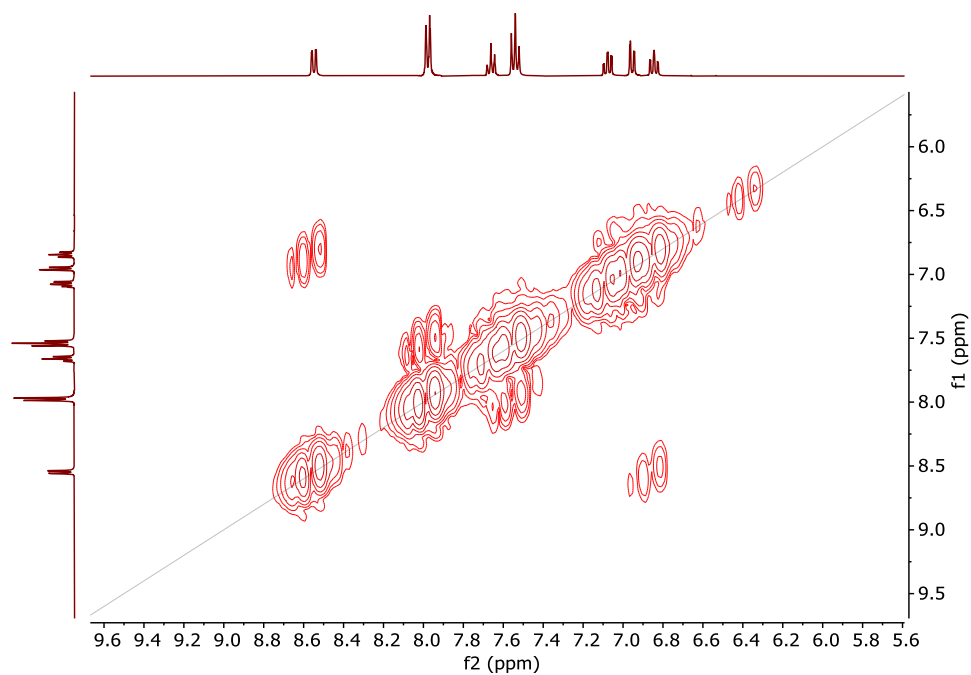

**Figure S17:** Expanded  $^1\text{H}$ - $^1\text{H}$  COSY-NMR (600 MHz) spectrum of complex **C2** in  $\text{DMSO-}d_6$ .

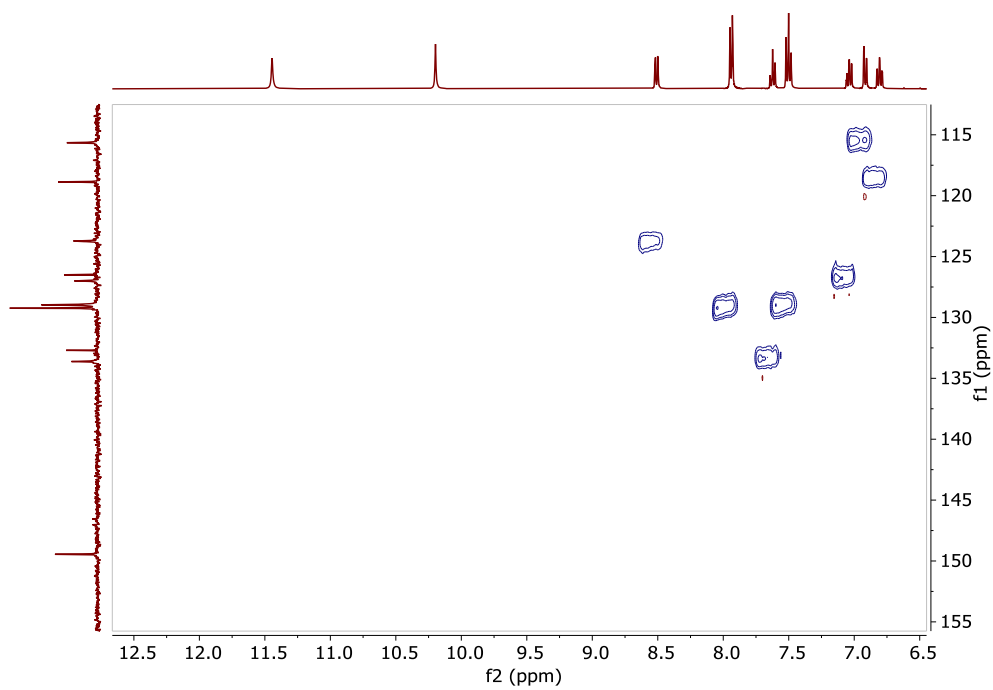

**Figure S18:** Expanded HSQC spectrum (600 MHz) of **C2** in  $\text{DMSO-}d_6$ .

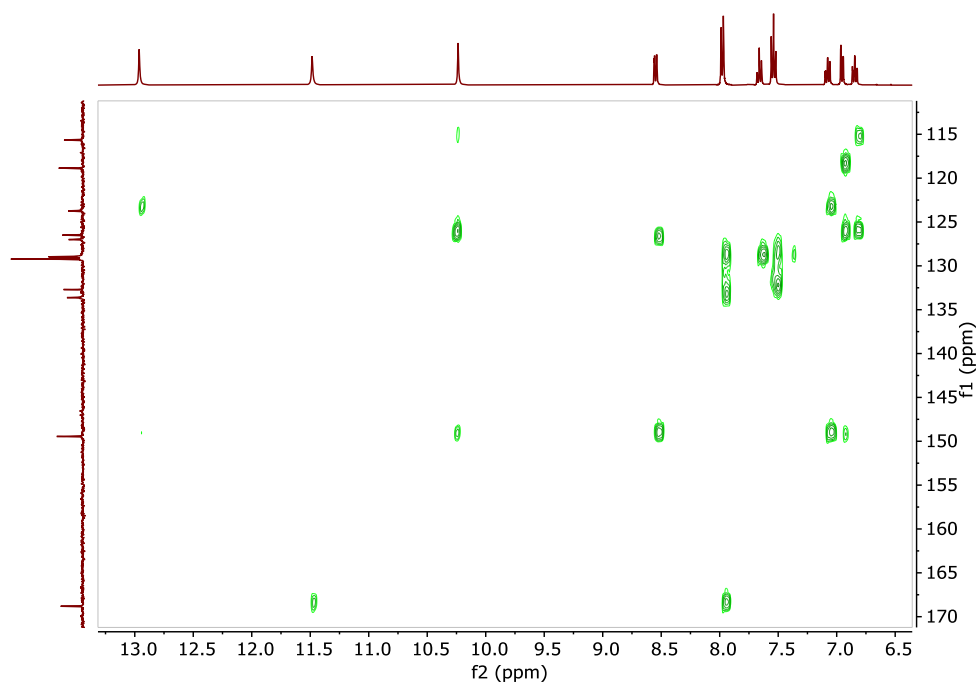

**Figure S19:**  $^1\text{H}$ - $^{13}\text{C}$  HMBC-NMR (600 MHz) spectrum of complex **C2** in  $\text{DMSO-}d_6$ .

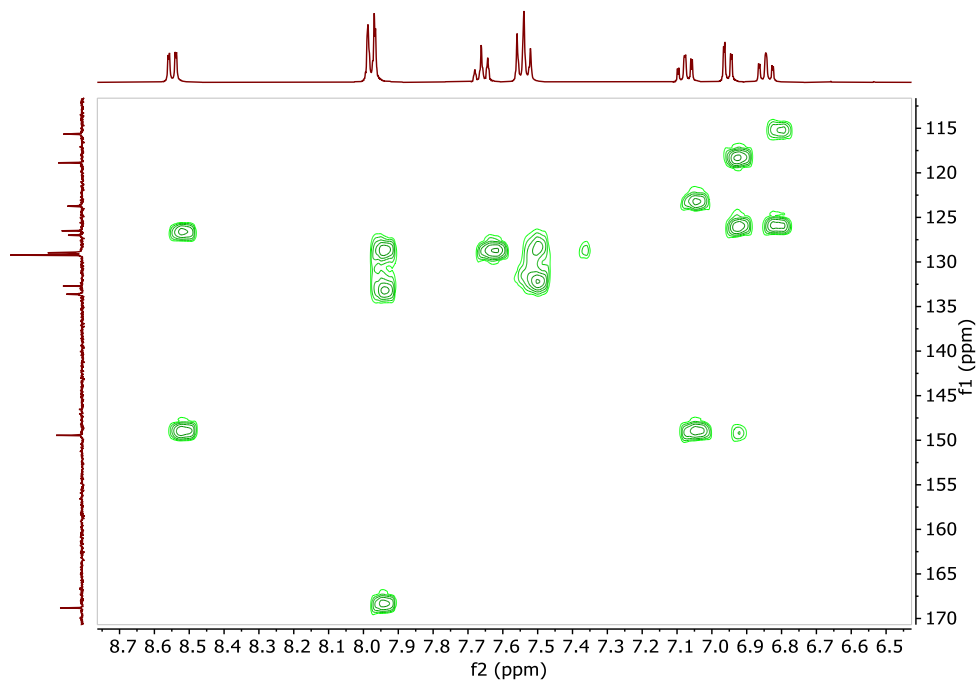

**Figure S20:** Expanded  $^1\text{H}$ - $^{13}\text{C}$  HMBC-NMR (600 MHz) spectrum of complex **C2** in  $\text{DMSO-}d_6$ .

Lastly in the NOESY spectrum, the proton signal at  $\delta$  11.45 ppm shows a correlation with the signals for  $H_h$ , pointing it to be the signal for  $NH_a$ . Similarly, the proton signal at  $\delta$  10.20 ppm shows a NOESY correlation with signals assigned for  $H_d$  protons, confirming the signal for  $OH_c$ . Naturally, the signal proton signal at  $\delta$  12.92 ppm is assigned to  $NH_b$  proton.

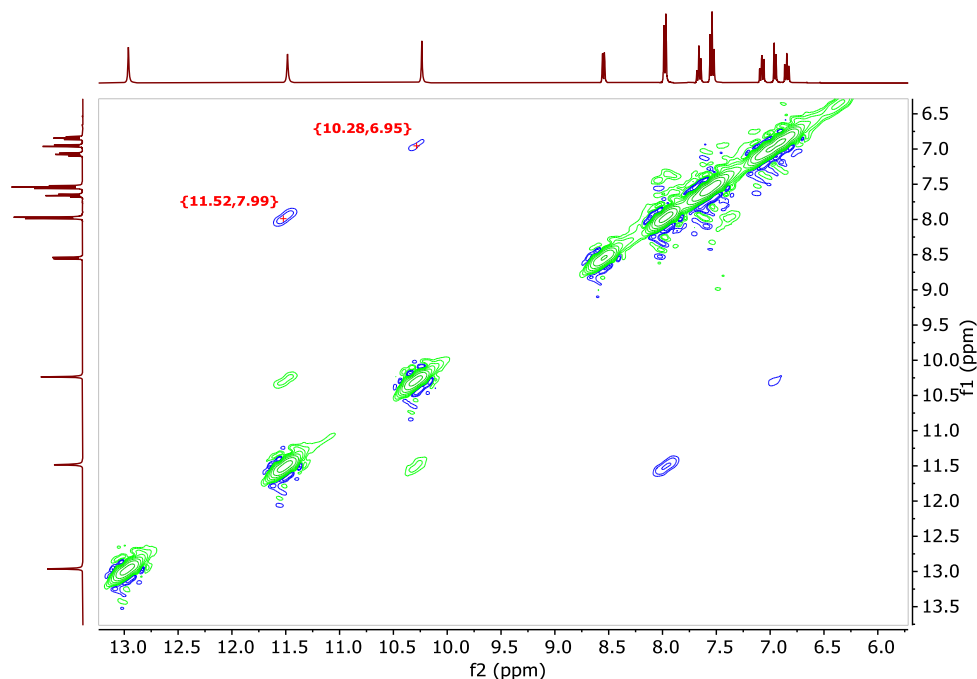

**Figure S21:**  $^1\text{H}$ - $^1\text{H}$  NOESY-NMR (600 MHz) spectrum of complex **C2** in  $\text{DMSO-}d_6$

**For C3:**

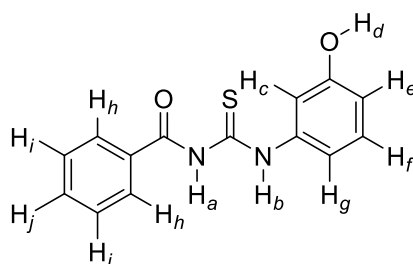

The  $^1\text{H}$ -NMR spectrum of **C3** shows a doublet and two triplets at  $\delta$  7.98, 7.67 and 7.54 ppm for 2H, 1H and 2H respectively. As there is no other possibility for a doublet and triplet with integration value of 2H, so the signal at  $\delta$  7.98 and 7.54 ppm must be for  $H_h$  and  $H_i$  respectively. Additionally, a correlated spectroscopy (COSY) correlation is observed between triplets at  $\delta$  7.67 and 7.54 ppm, thereby pointing the triplet at  $\delta$  7.67 ppm for  $H_j$ . A singlet at  $\delta$  7.29 ppm for 1H unambiguously corresponds to  $H_c$  as the signals for other possible singlets



(NH<sub>a</sub>, NH<sub>b</sub> and -OH<sub>c</sub>) are much more deshielded and appear downfield. Similarly, the triplet at  $\delta$  7.21 ppm for 1H can be attributed to signal for H<sub>f</sub>.

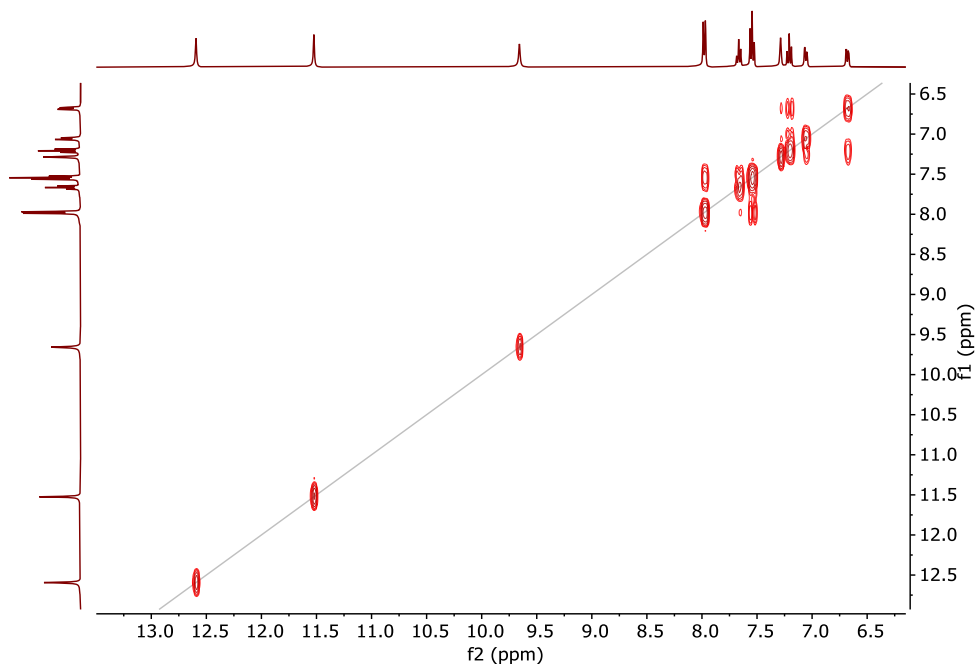

**Figure S22:** <sup>1</sup>H-<sup>1</sup>H COSY-NMR (400 MHz) spectrum of complex **C3** in DMSO-*d*<sub>6</sub>.

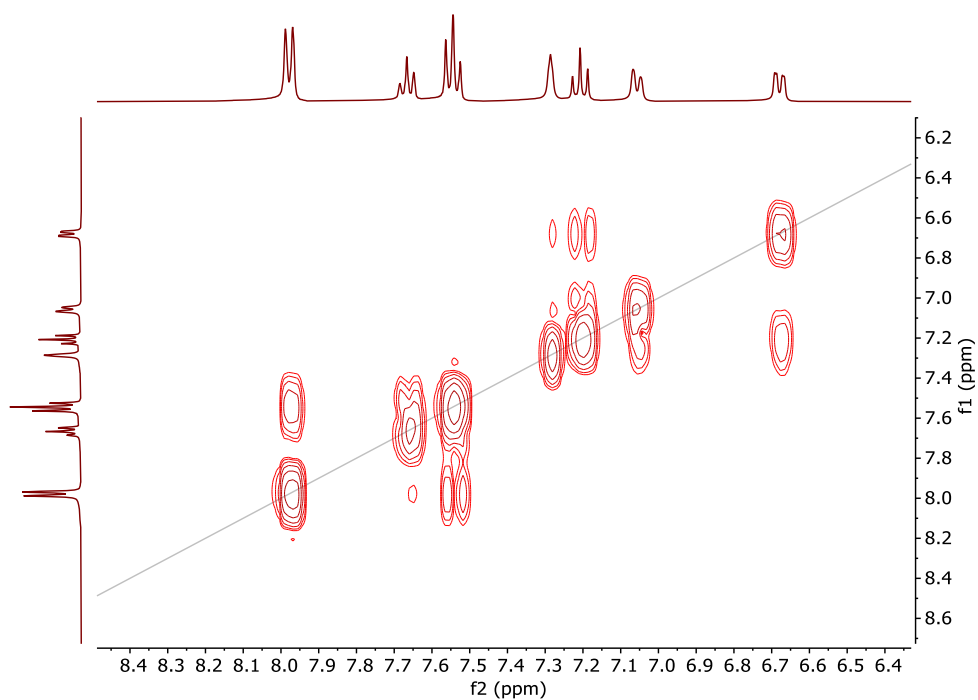

**Figure S23:** Expanded <sup>1</sup>H-<sup>1</sup>H COSY-NMR (400 MHz) spectrum of complex **C3** in DMSO-*d*<sub>6</sub>.

In the NOESY spectrum, the signal at  $\delta$  11.52 ppm shows a correlation with  $H_h$  protons, pointing it to be the signal for  $NH_a$ . Similarly, the signal at  $\delta$  12.59 ppm shows NOESY correlation with signal for  $NH_a$  and  $H_c$ , confirming the signal for  $NH_b$ . The assignment of  $NH_a$  and  $NH_b$  settles the signal at  $\delta$  9.66 ppm to  $OH_c$  proton. At this point the signals at  $\delta$  7.05 and 6.68 ppm can be designated to the  $H_g$  and  $H_e$  protons respectively owing to the NOESY correlation of  $OH_c$  proton with the signal at  $\delta$  6.68 ppm. As the signals for  $NH_a$  and  $NH_b$  could be clearly designated from COSY and NOESY NMR experiments, so we did not proceed towards complex Hetro-nuclear correlation spectroscopy.

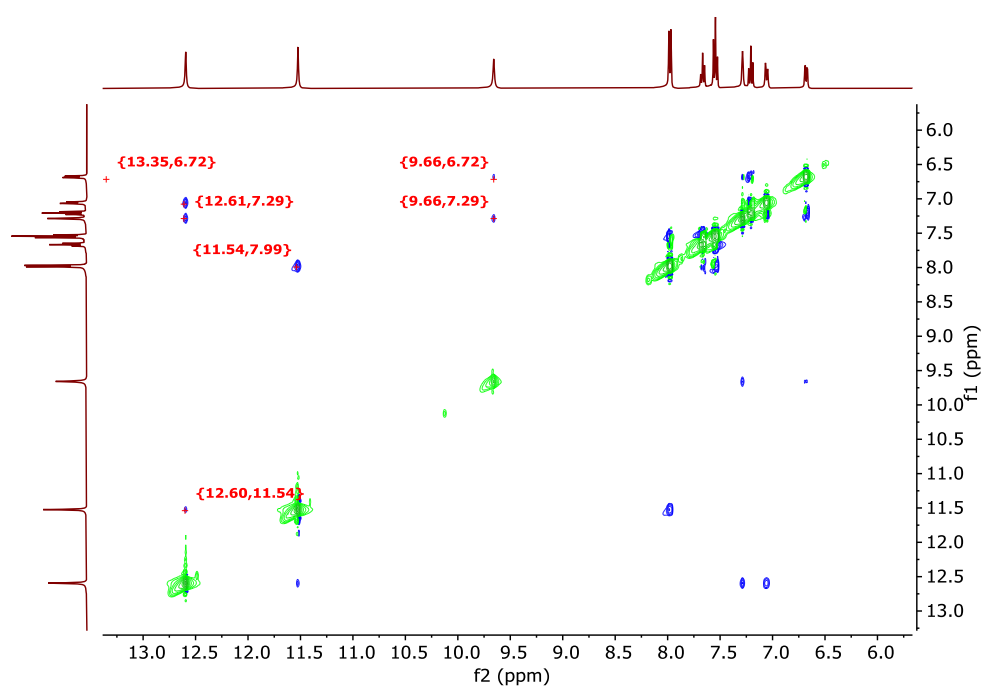

**Figure S24:**  $^1H$ - $^1H$  NOESY-NMR (600 MHz) spectrum of complex **C2** in  $DMSO-d_6$ .

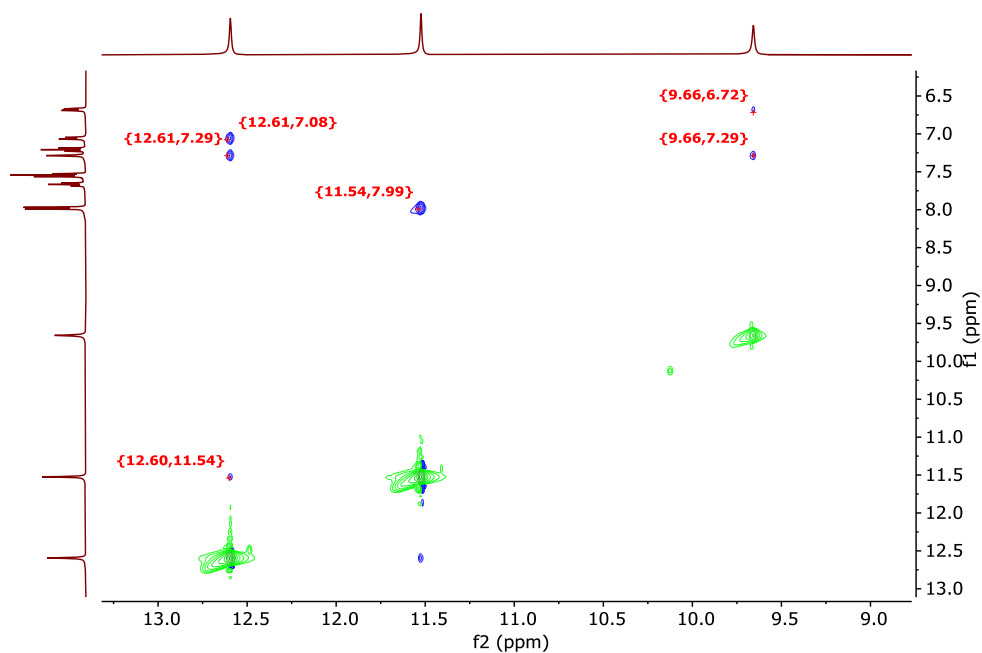

**Figure S25:** Expanded  $^1\text{H}$ - $^1\text{H}$  NOESY-NMR (600 MHz) spectrum of complex **C2** in  $\text{DMSO-}d_6$ .

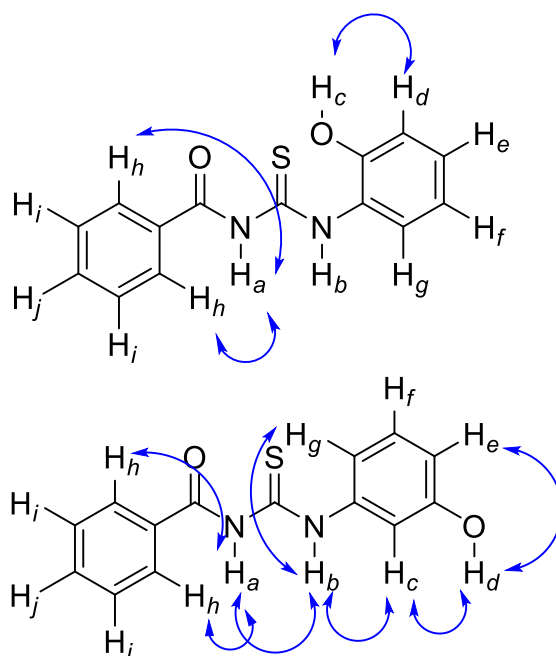

**Figure S26:** Important NOE interactions observed in **C2** (top) and **C3** (bottom).

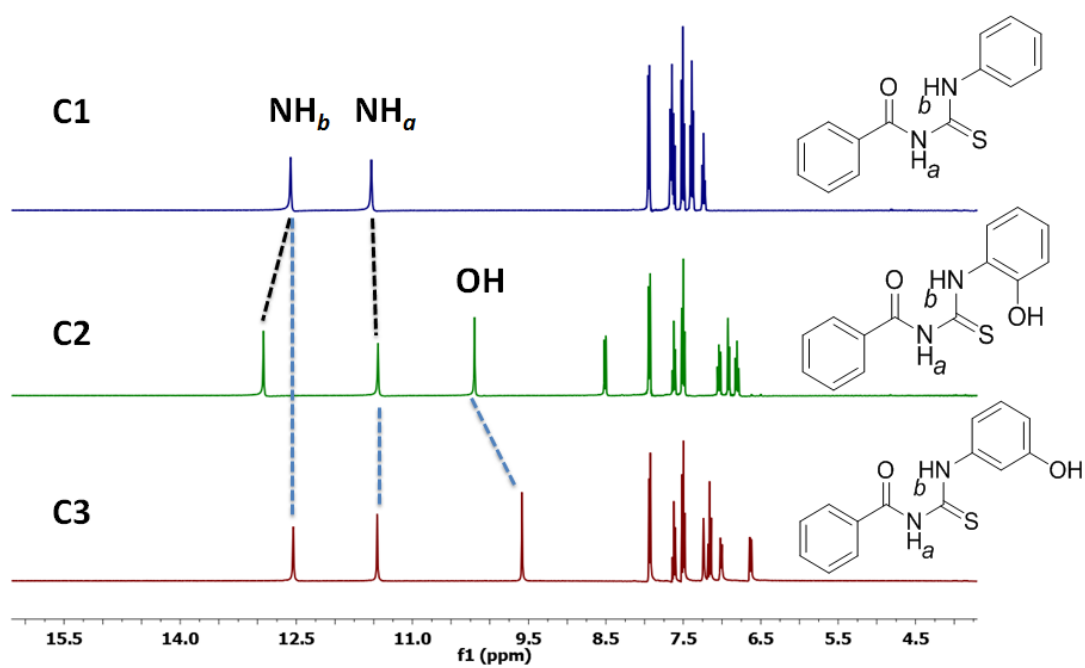

**Figure S27:** Stack plot for **C1-C3** recorded by  $^1\text{H}$  NMR with designation of  $\text{NH}_a$  and  $\text{NH}_b$  peaks ( $\text{DMSO-}d_6$ , 298 K).

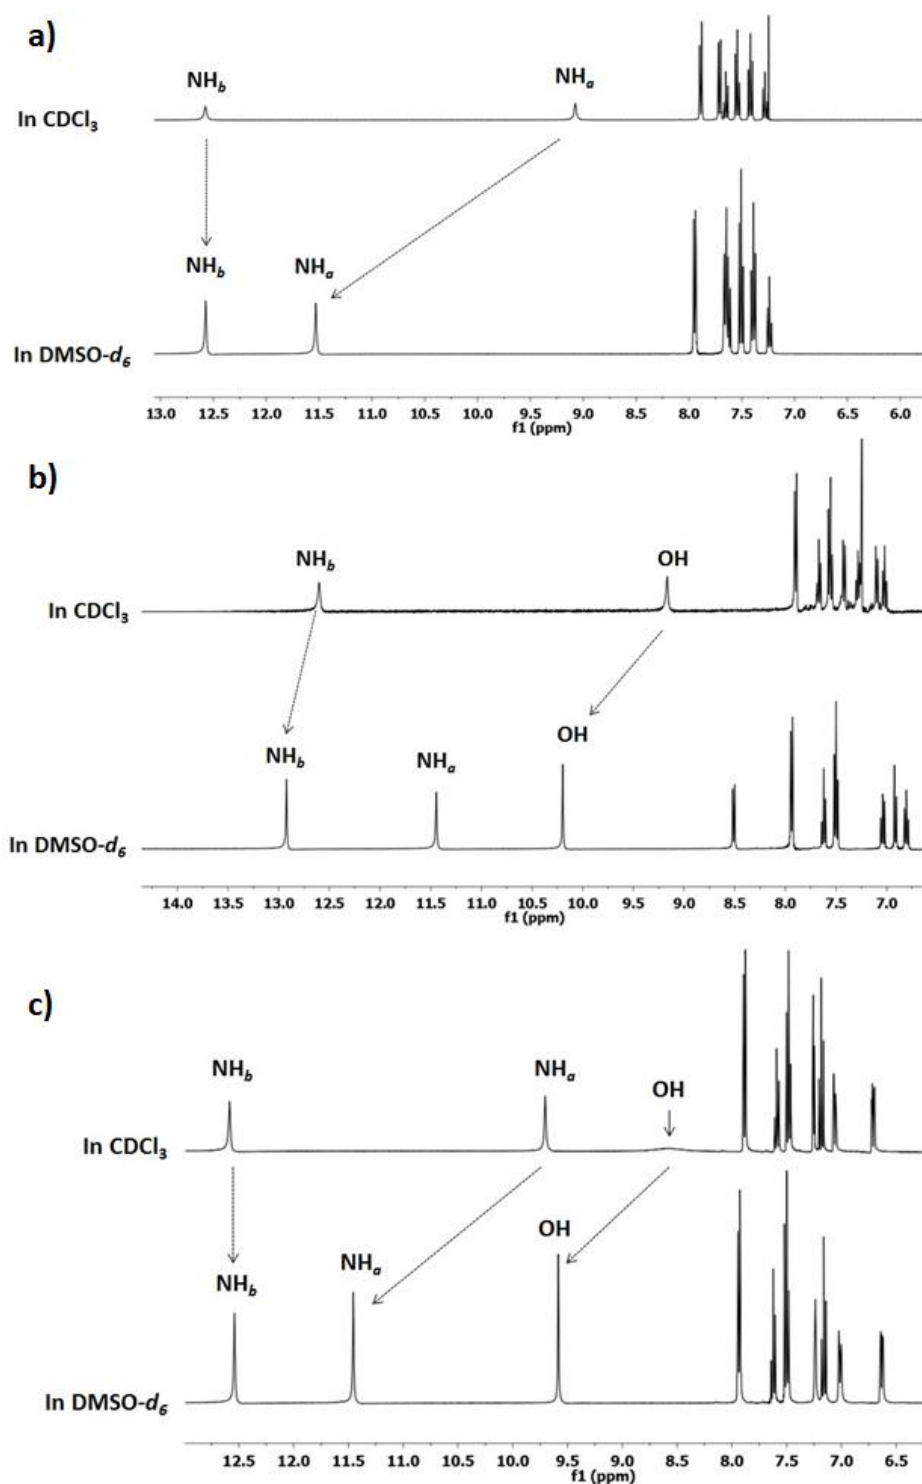

**Figure S28:** Changes in the  $^1\text{H}$  NMR spectrum of receptor a) **C1**, b) **C2** and c) **C3** (with particular interest to the position of  $\text{NH}_a$  and  $\text{NH}_b$  protons) in  $\text{CDCl}_3$  and  $\text{DMSO-}d_6$ .

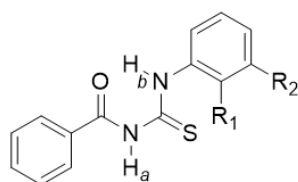

**C1:** R<sub>1</sub> = R<sub>2</sub> = H  
**C2:** R<sub>1</sub> = OH, R<sub>2</sub> = H  
**C3:** R<sub>1</sub> = H, R<sub>2</sub> = OH

| Receptors | Chemical shift (ppm) in DMSO- <i>d</i> <sub>6</sub> |                     |                   | Chemical shift (ppm) in CDCl <sub>3</sub> |                     |                   |
|-----------|-----------------------------------------------------|---------------------|-------------------|-------------------------------------------|---------------------|-------------------|
|           | $\delta\text{NH}_a$                                 | $\delta\text{NH}_b$ | $\delta\text{OH}$ | $\delta\text{NH}_a$                       | $\delta\text{NH}_b$ | $\delta\text{OH}$ |
| <b>C1</b> | 11.53                                               | 12.57               | x                 | 9.08                                      | 12.58               | x                 |
| <b>C2</b> | 11.45                                               | 12.93               | 10.20             | DA                                        | 12.60               | 9.17              |
| <b>C3</b> | 11.46                                               | 12.54               | 9.59              | 9.70                                      | 12.58               | 8.59              |

**Figure S29:** Chemical shift of the NH<sub>a</sub>, NH<sub>b</sub> and OH resonances for **C1-C3** in DMSO-*d*<sub>6</sub> and CDCl<sub>3</sub>. (DA: Do not Appear)

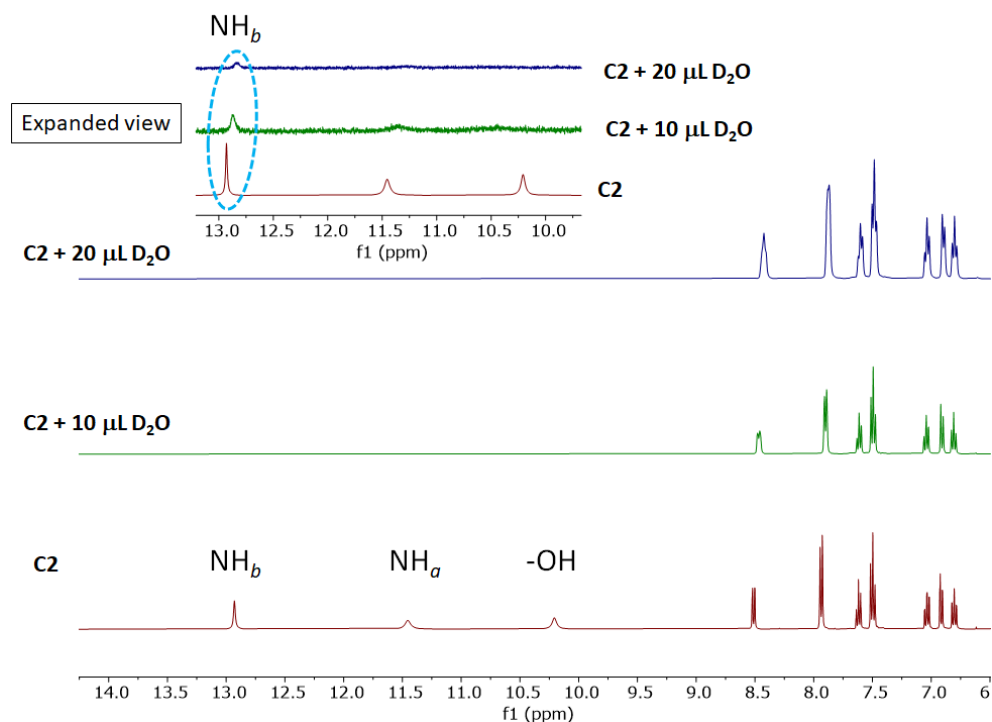

**Figure S30:** Changes in the <sup>1</sup>H NMR spectrum of receptor **C2** in DMSO-*d*<sub>6</sub> upon sequential addition of D<sub>2</sub>O (absolute intensity).

## UV-Vis study of the receptors **C1-C3**

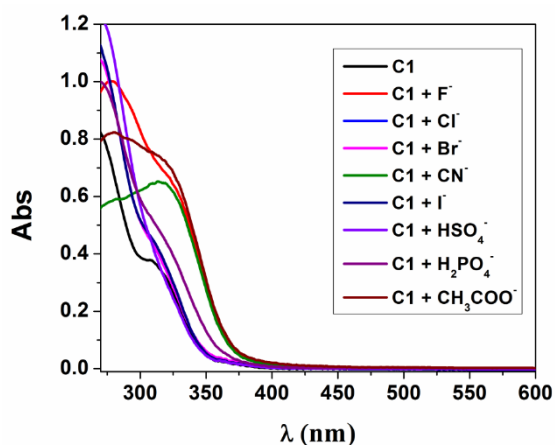

**Figure S31:** UV-Vis spectra for **C1** ( $[C1] = 4.7 \times 10^{-5}$  M) in presence of different anion ( $50 \times 10^{-3}$  M) as their tetraalkylammonium salt in DMSO as the solvent.

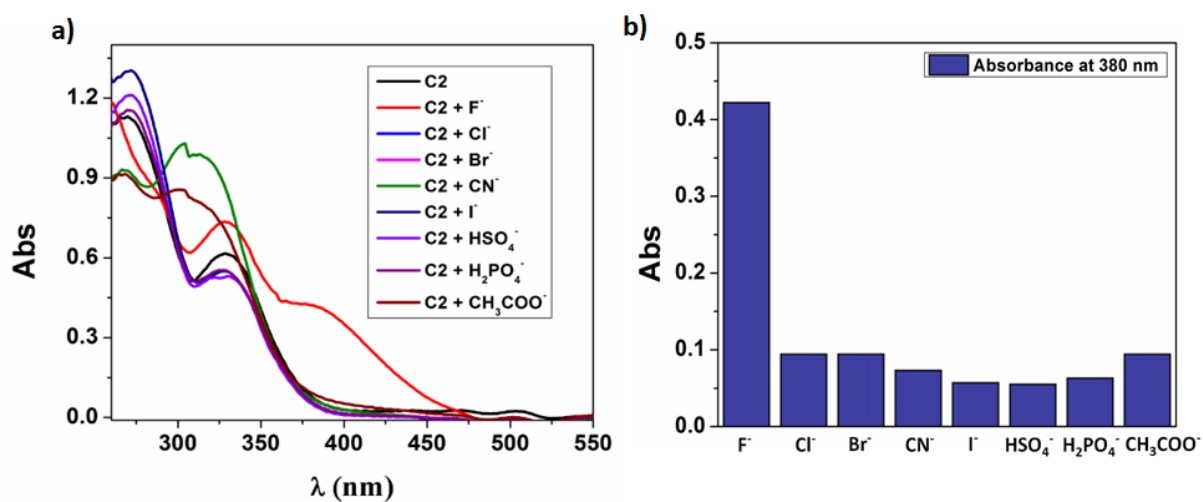

**Figure S32:** a) UV-Vis spectra for **C2** ( $[C2] = 6.2 \times 10^{-5}$  M) in presence of different anions ( $50 \times 10^{-3}$  M) as their tetraalkylammonium salt in DMSO as the solvent; b) Bar diagram representing UV-Vis response of **C2** in presence of different anion at  $\lambda_{\max} = 380$  nm.

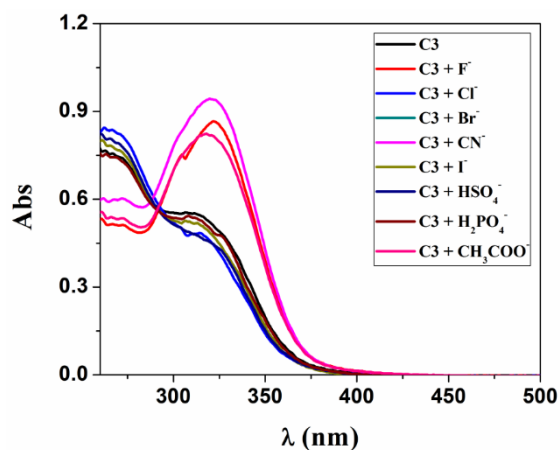

**Figure S33:** UV-Vis spectra for **C3** ( $[C3] = 4.7 \times 10^{-5} \text{ M}$ ) in presence of different anion ( $50 \times 10^{-3} \text{ M}$ ) in DMSO as the solvent.

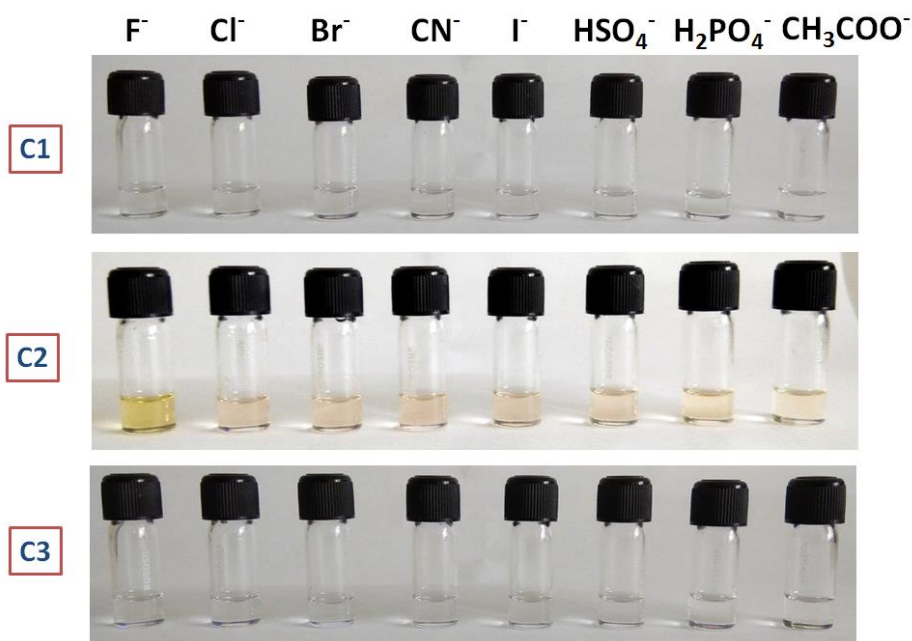

**Figure S34:** Image showing colorimetric response of the three receptors (**C1-C3**) in presence of different anions as their tetraalkylammonium salts in DMSO.



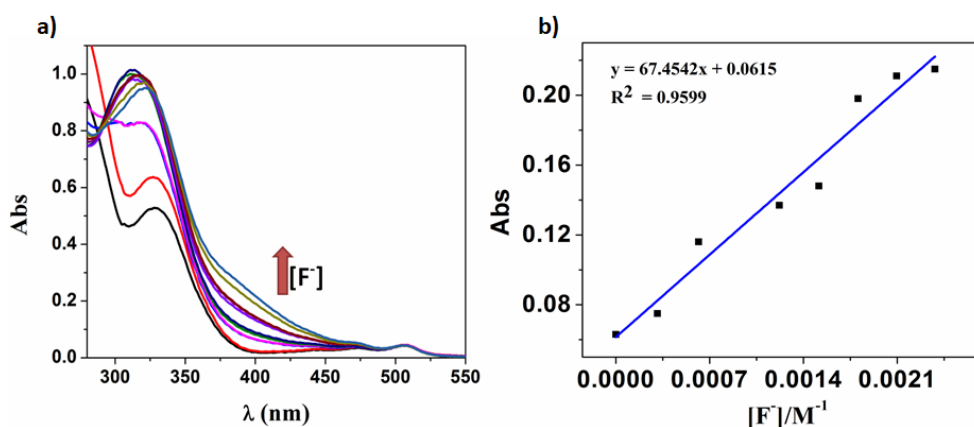

**Figure S35:** a) UV-Vis changes upon gradual addition of fluoride ( $50 \times 10^{-3}$  M) solution in presence of **C2** ( $[C2] = 6.2 \times 10^{-5}$  M) in DMSO; b) Calibration for the titration data of **C2** versus TBAF in DMSO at  $\lambda_{\max} = 380$ nm.

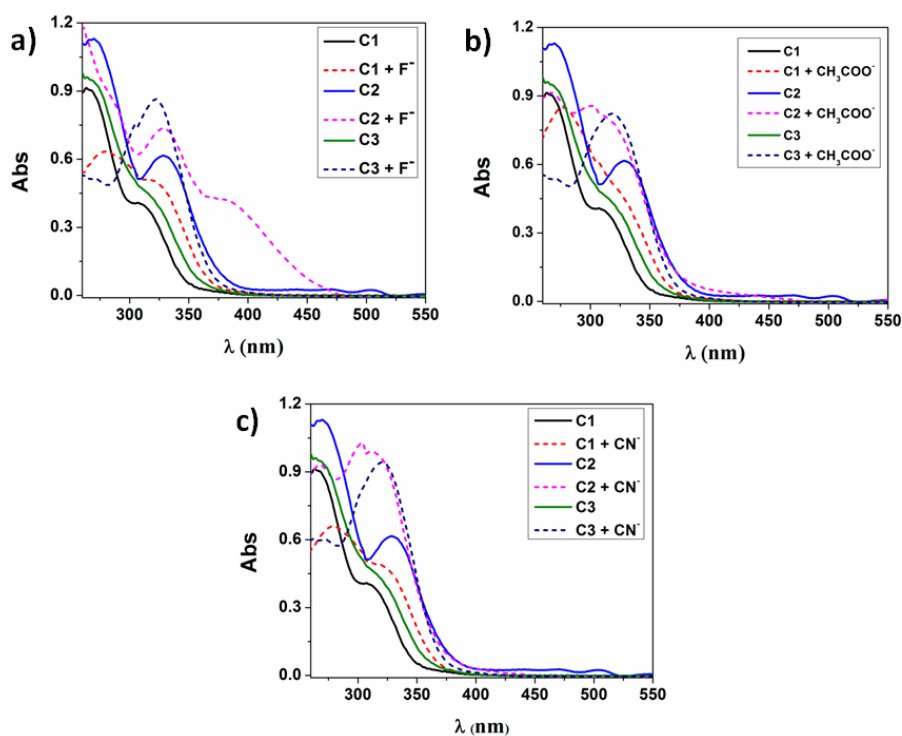

**Figure S36:** Comparative study of UV-Vis spectrum for **C1-C3** ( $6.2 \times 10^{-5}$  M) in presence of a)  $F^-$ , b)  $CH_3COO^-$  and c)  $CN^-$  as their tetraalkylammonium salts ( $50 \times 10^{-3}$  M) in DMSO.

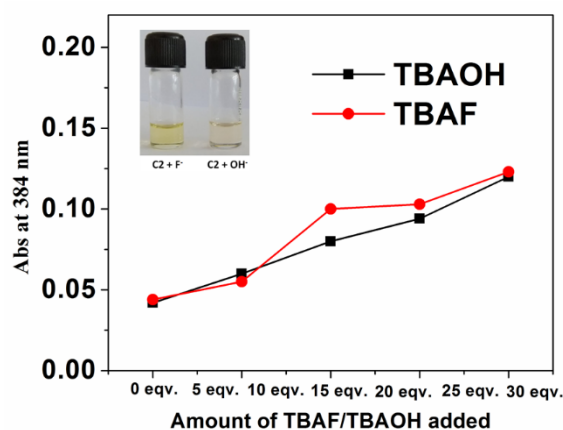

**Figure S37:** Comparative study of change in absorbance upon addition of different equivalents of TBAF ( $50 \times 10^{-3}$  M) and TBAOH ( $50 \times 10^{-3}$  M) solution to C2 ( $[C2] = 6.2 \times 10^{-5}$  M) w.r.t absorbance at  $\lambda = 380$  nm in DMSO.

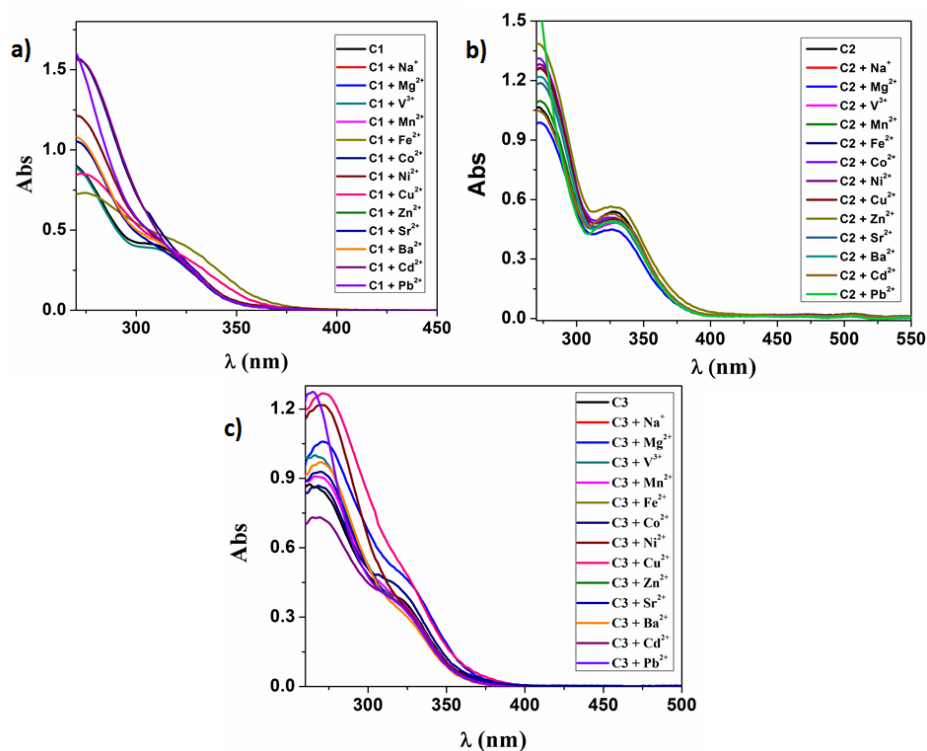

**Figure S38:** Change in the UV-Vis spectra of C1-C3 ( $6.2 \times 10^{-5}$  M) (a-c) in DMSO solution upon addition of different metal salts ( $3.8 \times 10^{-4}$  M) (NaCl, MgSO<sub>4</sub>, VCl<sub>3</sub>, MnCl<sub>2</sub>, FeSO<sub>4</sub>, CoCl<sub>2</sub>, NiCl<sub>2</sub>.6H<sub>2</sub>O, CuCl<sub>2</sub>.2H<sub>2</sub>O, ZnCl<sub>2</sub>, SrCl<sub>2</sub>, BaSO<sub>4</sub>, CdCl<sub>2</sub>, PbSO<sub>4</sub>) as aqueous solution.

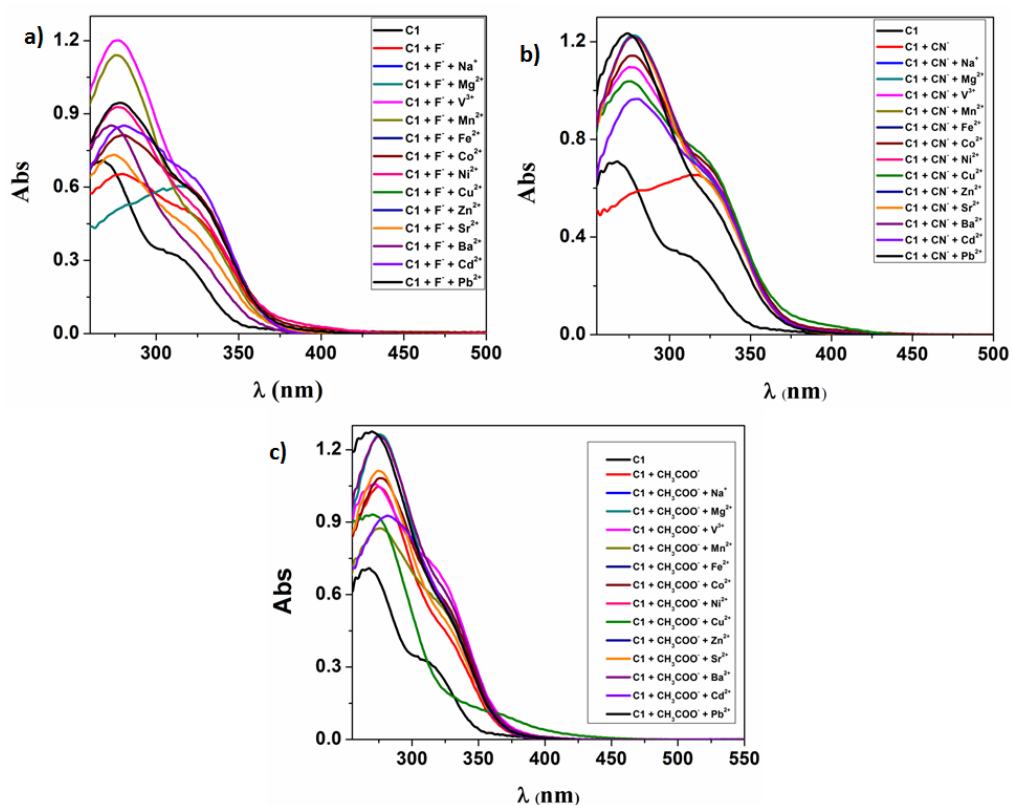

**Figure S39:** Change in the UV-Vis spectra of  $\text{C1.A}^-$  ( $[\text{C1}] = 4.7 \times 10^{-5} \text{ M}$  and  $\text{A} = \text{F}^-, \text{CN}^-, \text{CH}_3\text{COO}^-$ ;  $[\text{F}^-] = 7.8 \times 10^{-4} \text{ M}$ ,  $[\text{CN}^-] = 7.8 \times 10^{-4} \text{ M}$ ,  $[\text{CH}_3\text{COO}^-] = 7.8 \times 10^{-4} \text{ M}$ ) in DMSO solution upon addition of different metal salts ( $\text{NaCl}$ ,  $\text{MgSO}_4$ ,  $\text{VCl}_3$ ,  $\text{MnCl}_2$ ,  $\text{FeSO}_4$ ,  $\text{CoCl}_2 \cdot 6\text{H}_2\text{O}$ ,  $\text{NiCl}_2 \cdot 6\text{H}_2\text{O}$ ,  $\text{CuCl}_2 \cdot 2\text{H}_2\text{O}$ ,  $\text{ZnCl}_2$ ,  $\text{SrCl}_2$ ,  $\text{BaCl}_2$ ,  $\text{CdCl}_2$ ,  $\text{PbSO}_4$ ) as aqueous solution ( $3.8 \times 10^{-4} \text{ M}$ ).

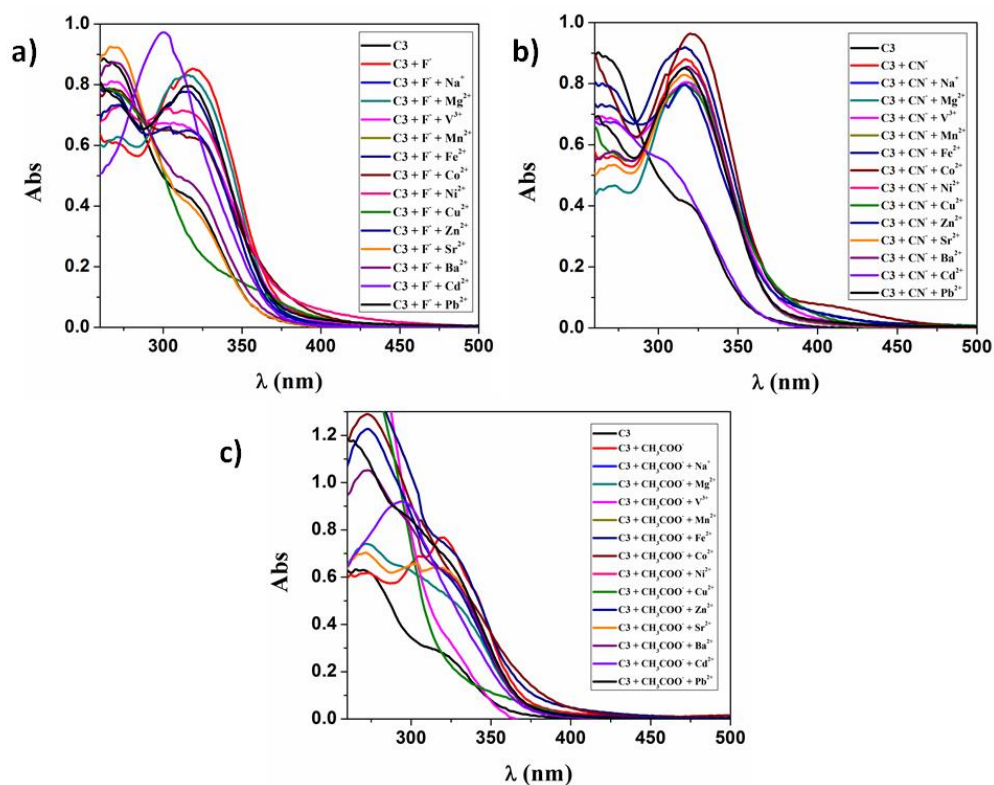

**Figure S40:** Change in the UV-Vis spectra of  $C3.A^-$  ( $[C3] = 4.7 \times 10^{-5}$  M and  $A = F^-$ ,  $CN^-$ ,  $CH_3COO^-$ ;  $[F^-] = 1.5 \times 10^{-3}$  M,  $[CN^-] = 1.5 \times 10^{-3}$  M,  $[CH_3COO^-] = 1.5 \times 10^{-3}$  M) in DMSO solution upon addition of different metal salts (NaCl, MgSO<sub>4</sub>, VCl<sub>3</sub>, MnCl<sub>2</sub>, FeSO<sub>4</sub>, CoCl<sub>2</sub>.6H<sub>2</sub>O, NiCl<sub>2</sub>.6H<sub>2</sub>O, CuCl<sub>2</sub>.2H<sub>2</sub>O, ZnCl<sub>2</sub>, SrCl<sub>2</sub>, BaSO<sub>4</sub>, CdCl<sub>2</sub>, PbSO<sub>4</sub>) as aqueous solution ( $3.8 \times 10^{-4}$  M).

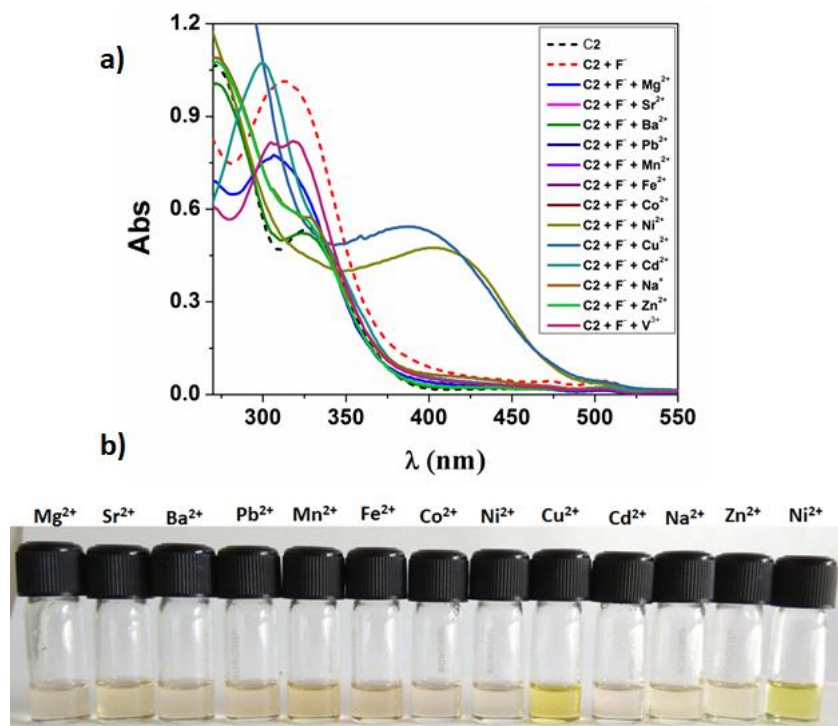

**Figure S41:** a) Change in the UV-Vis spectra of  $C2.F^-$  ( $[C2] = 6.2 \times 10^{-5} M$ ,  $[F^-] = 1.53 \times 10^{-3} M$ ) in DMSO solution upon addition of different metal salts (NaCl, MgSO<sub>4</sub>, VCl<sub>3</sub>, MnCl<sub>2</sub>, FeSO<sub>4</sub>, CoCl<sub>2</sub>.6H<sub>2</sub>O, NiCl<sub>2</sub>.6H<sub>2</sub>O, CuCl<sub>2</sub>.2H<sub>2</sub>O, ZnCl<sub>2</sub>, SrCl<sub>2</sub>, BaSO<sub>4</sub>, CdCl<sub>2</sub>, PbSO<sub>4</sub>) as aqueous solution; b) Image showing colorimetric response of  $C2.F^-$  ( $[C2] = 6.2 \times 10^{-5} M$ ,  $[F^-] = 0.15 \times 10^{-3} M$ ) in presence of different metal ions (as their aqueous salt solution) in DMSO.

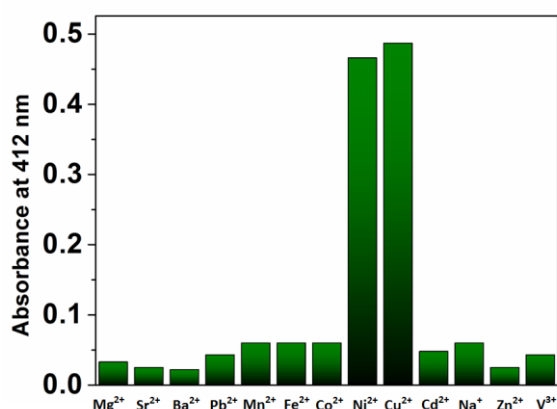

**Figure S42:** Bar diagram corresponding to the absorbance at 405 nm for  $C2.F^-$  ( $[C2] = 6.2 \times 10^{-5} M$ ,  $[F^-] = 1.53 \times 10^{-3} M$ ) solution in DMSO solution in presence of different metal ions screened.

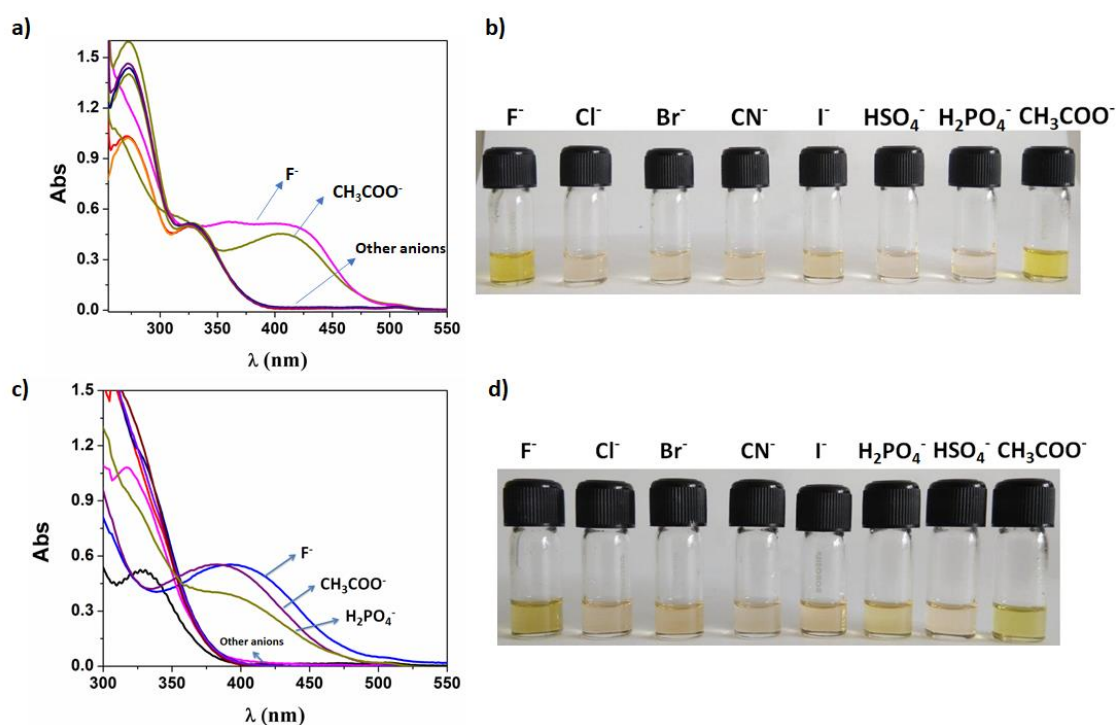

**Figure S43:** a) Change in the UV-Vis spectra of **C2** solution ([**C2**] = 6.2 × 10<sup>-5</sup> M) in DMSO upon sequential addition of aqueous NiCl<sub>2</sub>·6H<sub>2</sub>O ([Ni<sup>2+</sup>] = 3.8 × 10<sup>-4</sup> M) solution and different anions (F<sup>-</sup>, Cl<sup>-</sup>, Br<sup>-</sup>, CN<sup>-</sup>, I<sup>-</sup>, H<sub>2</sub>PO<sub>4</sub><sup>-</sup>, HSO<sub>4</sub><sup>-</sup>, CH<sub>3</sub>COO<sup>-</sup>) as their tetraalkylammonium salt (50 × 10<sup>-3</sup> M) in DMSO; b) Photograph showing colorimetric change upon sequential addition of various anions as their tetraalkylammonium salt to **C2**:Ni<sup>2+</sup> mixture in DMSO/water; c) Change in the UV-Vis spectra of **C2** solution ([**C2**] = 6.2 × 10<sup>-5</sup> M) in DMSO upon sequential addition of aqueous CuCl<sub>2</sub>·2H<sub>2</sub>O ([Cu<sup>2+</sup>] = 3.8 × 10<sup>-4</sup> M) solution and different anions (F<sup>-</sup>, Cl<sup>-</sup>, Br<sup>-</sup>, CN<sup>-</sup>, I<sup>-</sup>, H<sub>2</sub>PO<sub>4</sub><sup>-</sup>, HSO<sub>4</sub><sup>-</sup>, CH<sub>3</sub>COO<sup>-</sup>) as their tetraalkylammonium salt (50 × 10<sup>-3</sup> M) in DMSO; d) Photograph showing colorimetric change upon sequential addition of various anions as their tetraalkylammonium salt to **C2**:Cu<sup>2+</sup> mixture in DMSO/water.

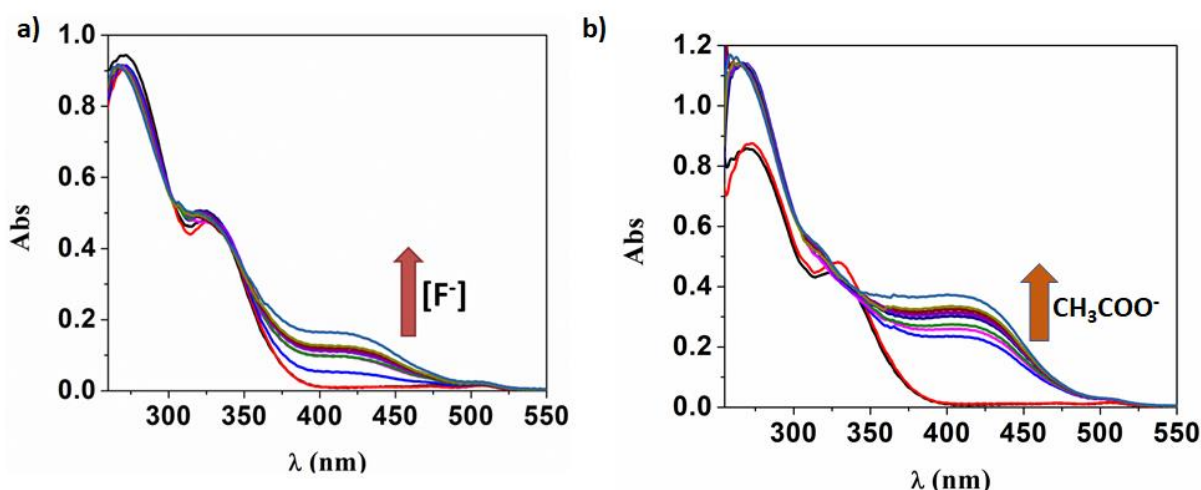

**Figure S44:** a) Evolution of UV-Vis spectra of **C2** and Ni<sup>2+</sup> ([C2] = 6.2 × 10<sup>-5</sup> M, [Ni<sup>2+</sup>] = 7.5 × 10<sup>-4</sup> M) mixture in DMSO/water upon gradual addition of F<sup>-</sup> ion (50 × 10<sup>-3</sup> M) in DMSO; b) Evolution of UV-Vis spectra of **C2** and Ni<sup>2+</sup> ([C2] = 6.2 × 10<sup>-5</sup> M, [Ni<sup>2+</sup>] = 7.5 × 10<sup>-4</sup> M) mixture in DMSO/water upon gradual addition of CH<sub>3</sub>COO<sup>-</sup> ion (50 × 10<sup>-3</sup> M) in DMSO.

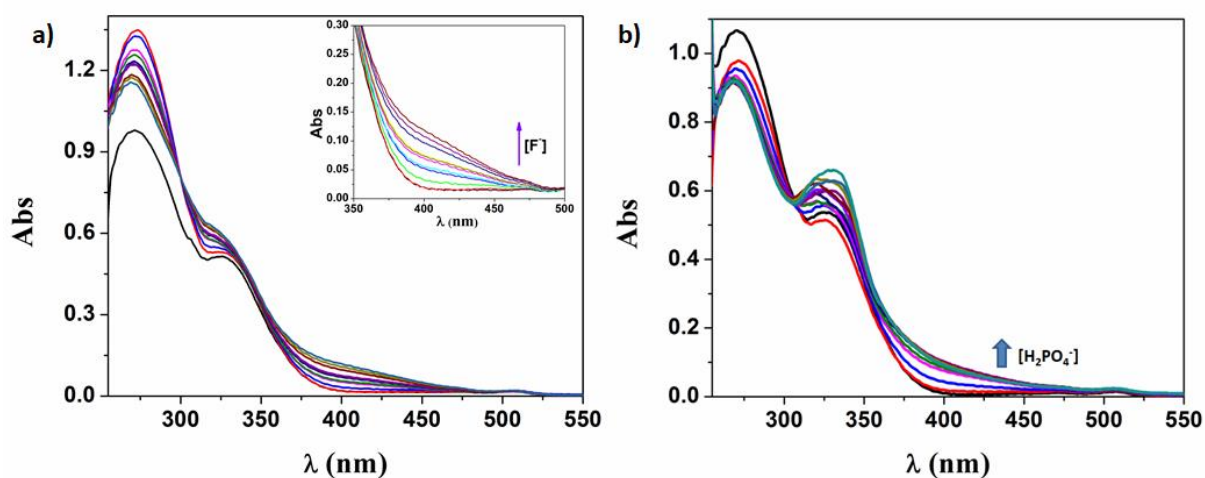

**Figure S45:** a) Evolution of UV-Vis spectra of **C2** and Cu<sup>2+</sup> ([C2] = 6.2 × 10<sup>-5</sup> M, [Cu<sup>2+</sup>] = 3.8 × 10<sup>-5</sup> M) mixture in DMSO/water upon gradual addition of F<sup>-</sup> ion (50 × 10<sup>-3</sup> M) in DMSO; b) Evolution of UV-Vis spectra of **C2** and Cu<sup>2+</sup> ([C2] = 6.2 × 10<sup>-5</sup> M, [Cu<sup>2+</sup>] = 3.8 × 10<sup>-5</sup> M) mixture in DMSO/water upon gradual addition of H<sub>2</sub>PO<sub>4</sub><sup>-</sup> ion (50 × 10<sup>-3</sup> M) in DMSO.

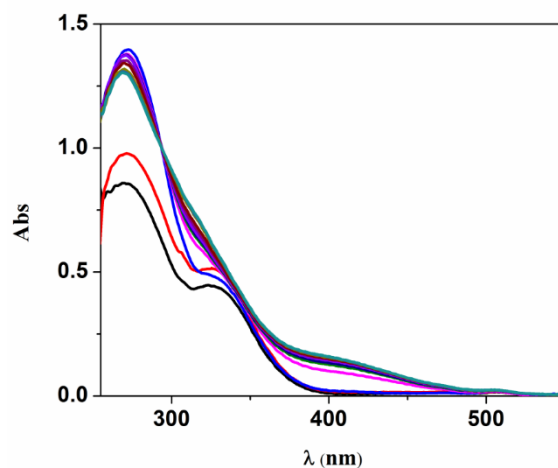

**Figure S46:** UV-Vis spectra of **C2** and  $\text{Cu}^{2+}$  ( $[\text{C2}] = 6.2 \times 10^{-5} \text{ M}$ ,  $[\text{Cu}^{2+}] = 3.8 \times 10^{-5} \text{ M}$ ) mixture in DMSO/water upon gradual addition of  $\text{CH}_3\text{COO}^-$  ion ( $50 \times 10^{-3} \text{ M}$ ) in DMSO.

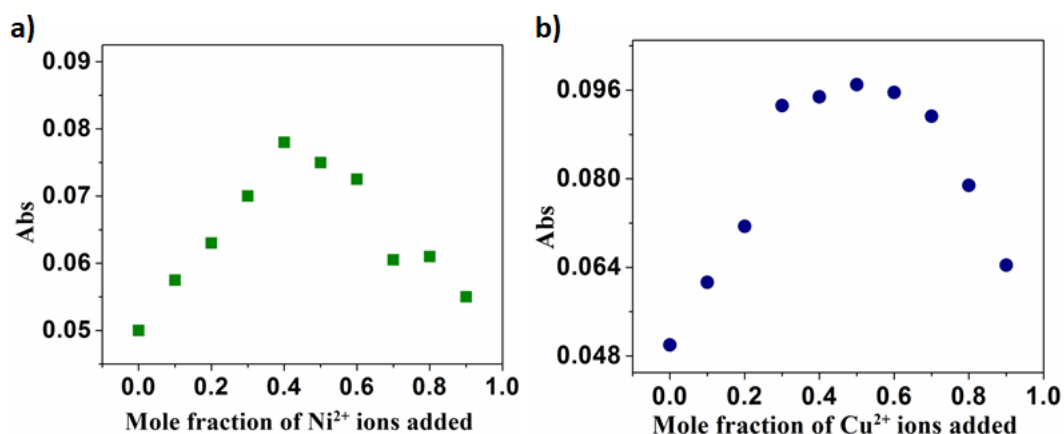

**Figure S47:** a) Job's plot for **C2.F<sup>-</sup>** ( $[\text{C2}] = 4.6 \times 10^{-5} \text{ M}$ ,  $[\text{F}^-] = 4.6 \times 10^{-5} \text{ M}$ ) DMSO/water mixture and  $\text{Ni}^{2+}$  ( $4.6 \times 10^{-5} \text{ M}$ ) in DMSO; b) Job's plot for **C2.F<sup>-</sup>** ( $[\text{C2}] = 4.6 \times 10^{-5} \text{ M}$ ,  $[\text{F}^-] = 4.6 \times 10^{-5} \text{ M}$ ) DMSO/water mixture and  $\text{Cu}^{2+}$  ( $4.6 \times 10^{-5} \text{ M}$ ) in DMSO.



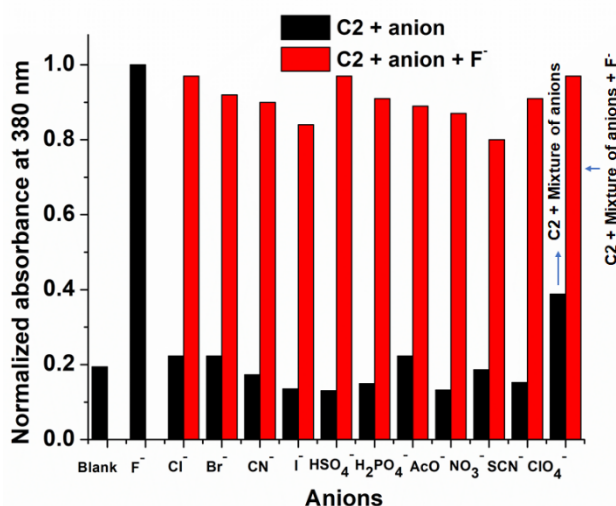

**Figure S48:** Bar graph of anti-interference performance of **C2** for  $F^-$  in presence of other anion solutions in DMSO.

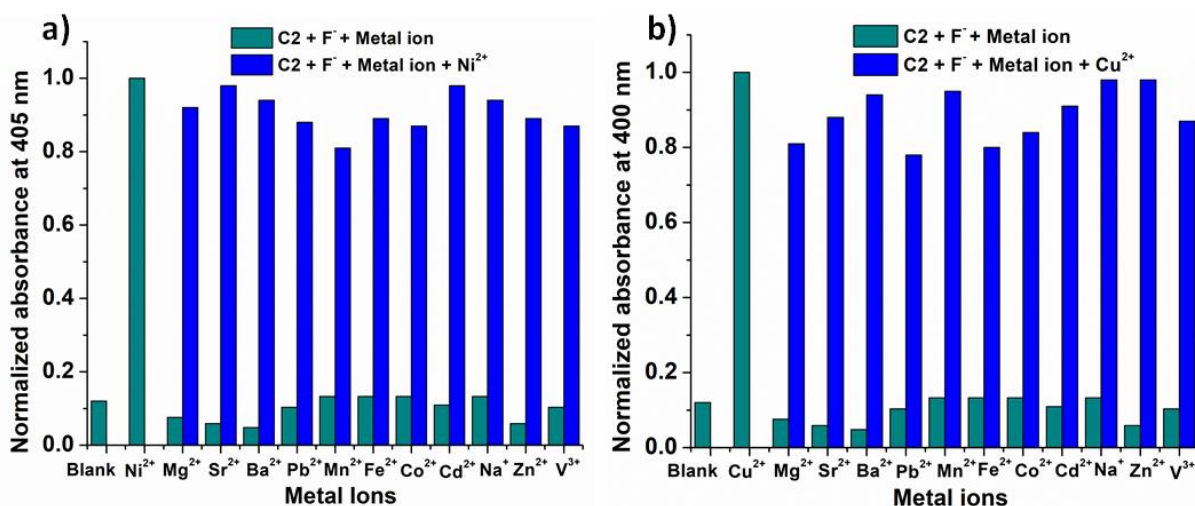

**Figure S49:** a) Absorption spectrum of **C2** in presence of  $F^-$  in DMSO with the presence of various cations (5 equiv.) and  $Ni^{2+}$  (5 equiv.) as aqueous salt solutions. The green bars represent the absorption intensity of **C2** in the presence of other metal ions (5 equiv.); the blue bars represent the absorption intensity of **C2** in the presence of the indicated metal ions, followed by 5 equiv. of  $Ni^{2+}$  ion; b) Absorption spectrum of **C2** in presence of  $F^-$  in DMSO with the presence of various cations (5 equiv.) and  $Cu^{2+}$  (5 equiv.) as aqueous salt solutions. The green bars represent the absorption intensity of **C2** in the presence of other metal ions (5 equiv.); the blue bars represent the absorption intensity of **C2** in the presence of the indicated metal ions, followed by 5 equiv. of  $Cu^{2+}$  ion.

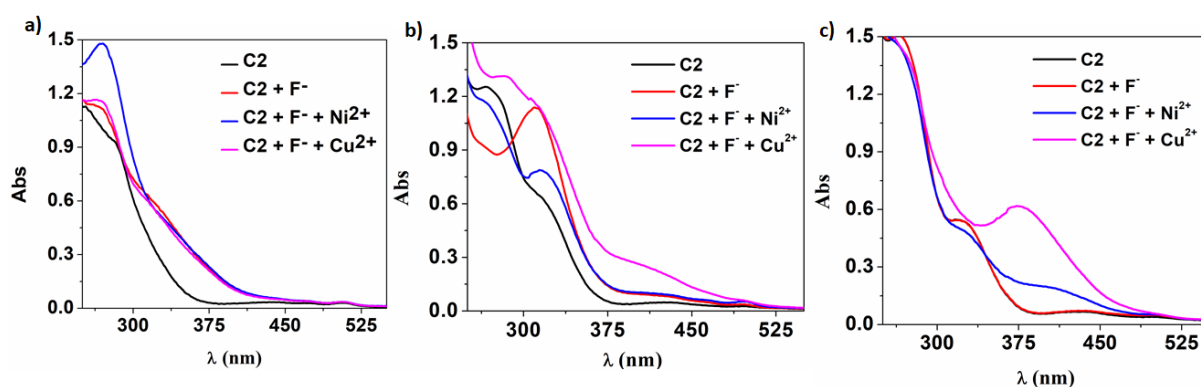

**Figure S50:** UV-Vis response upon sequential addition of aqueous metal chloride salt solutions ( $[\text{Ni}^{2+}] = 7.5 \times 10^{-4} \text{ M}$  and  $[\text{Cu}^{2+}] = 3.8 \times 10^{-5} \text{ M}$ ) to  $\text{C2.F}^-$  ( $[\text{C2}] = 6.2 \times 10^{-5} \text{ M}$ ,  $[\text{F}^-] = 1.53 \times 10^{-3} \text{ M}$ ) mixture in a) Chloroform ( $\text{CHCl}_3$ ) b) Acetonitrile ( $\text{CH}_3\text{CN}$ ) and c) methanol ( $\text{CH}_3\text{OH}$ ).

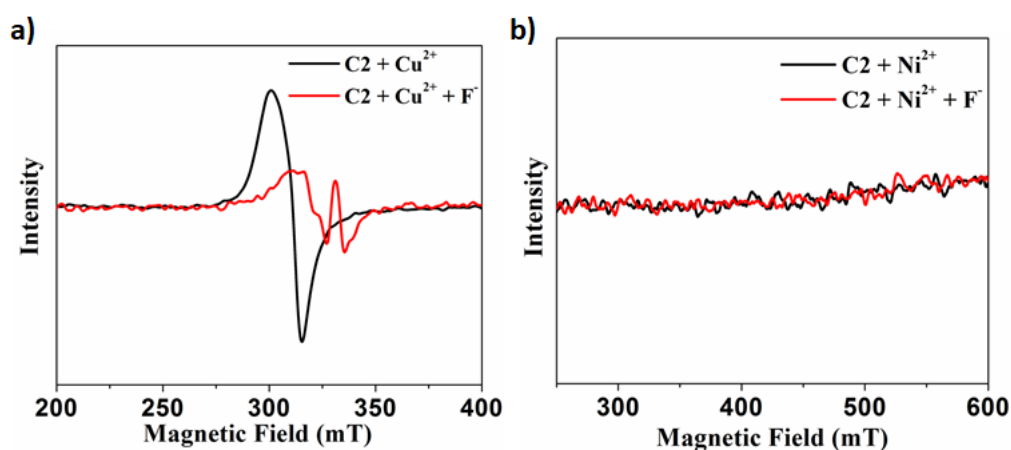

**Figure S51:** a) EPR spectra (100K, DMSO) [black: addition of  $\text{CuCl}_2$  (aq) to  $\text{C2}$  solution; red: addition of  $\text{CuCl}_2 \cdot 2\text{H}_2\text{O}$  (aq) to  $\text{C2}$  solution followed by TBAF in DMSO; b) EPR spectra (100K, DMSO) [black: addition of  $\text{NiCl}_2$  (aq) to  $\text{C2}$  solution; red: addition of  $\text{NiCl}_2 \cdot 6\text{H}_2\text{O}$  (aq) to  $\text{C2}$  solution followed by TBAF in DMSO.

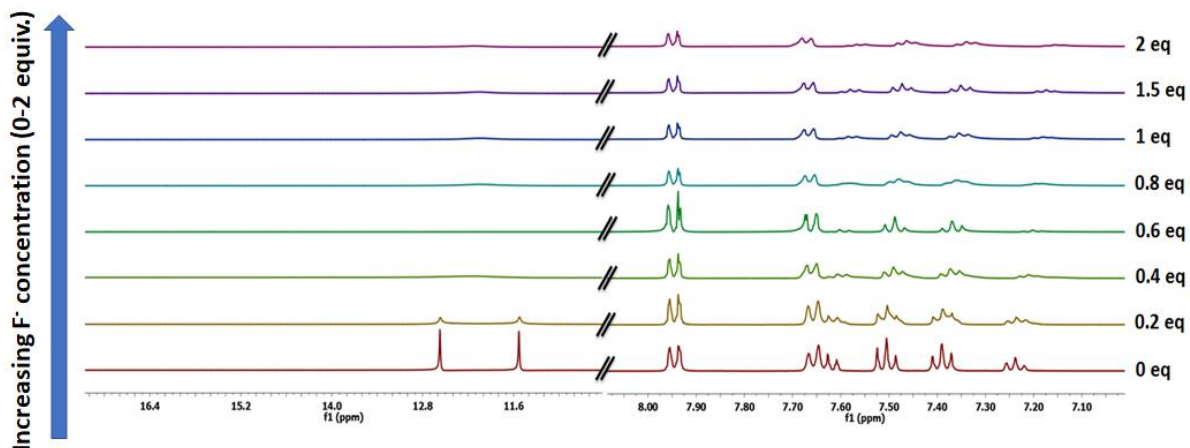

**Figure S52:** Titration of **C1** ( $5.62 \times 10^{-2}$  M) with TBAF (0-2 eq.) recorded by  $^1\text{H}$  NMR spectroscopy ( $\text{DMSO-}d_6$ , 298 K).

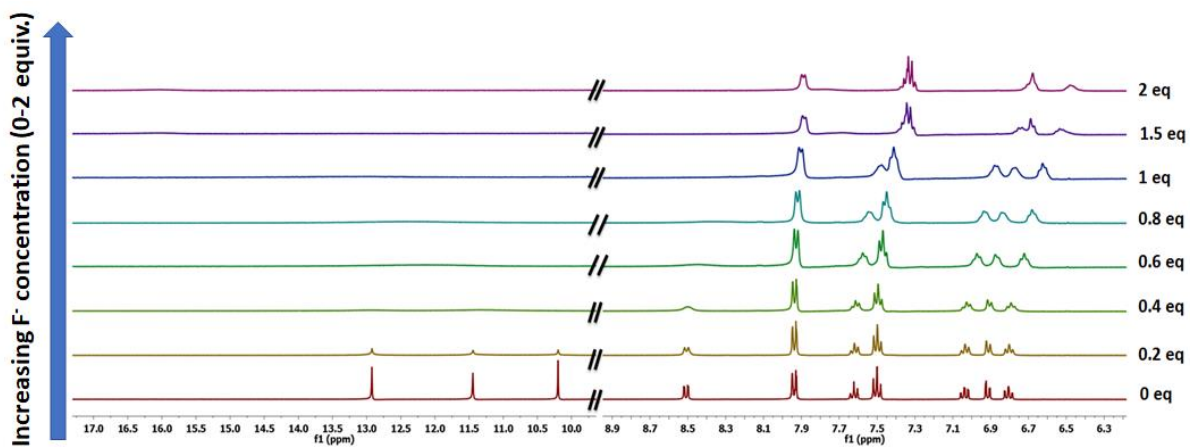

**Figure S53:** Titration of **C2** ( $7.32 \times 10^{-2}$  M) with TBAF (0-2 eq.) recorded by  $^1\text{H}$  NMR spectroscopy ( $\text{DMSO-}d_6$ , 298K).

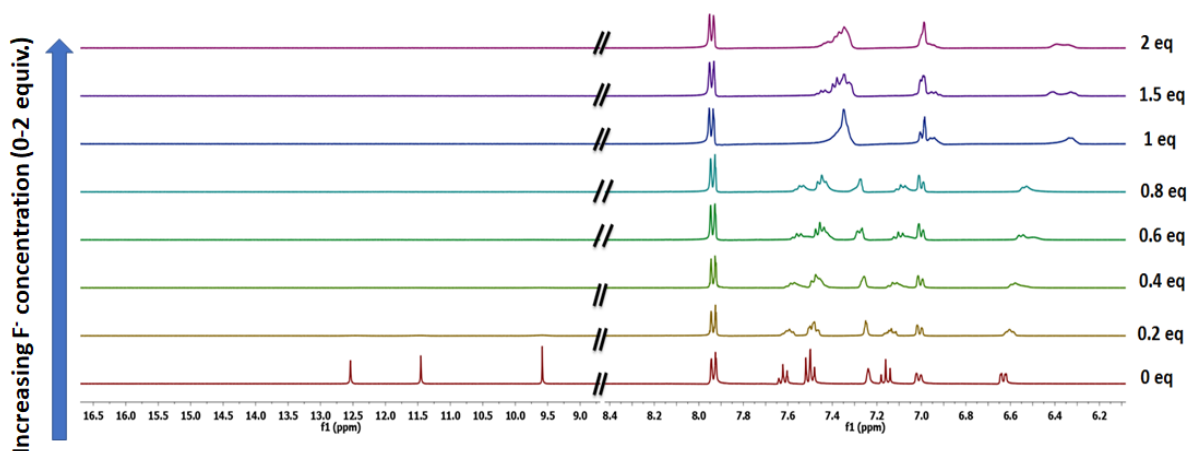

**Figure S54:** Titration of **C3** ( $7.32 \times 10^{-2}$  M) with TBAF (0-2 eq.) recorded by  $^1\text{H}$  NMR spectroscopy ( $\text{DMSO-}d_6$ , 298 K).

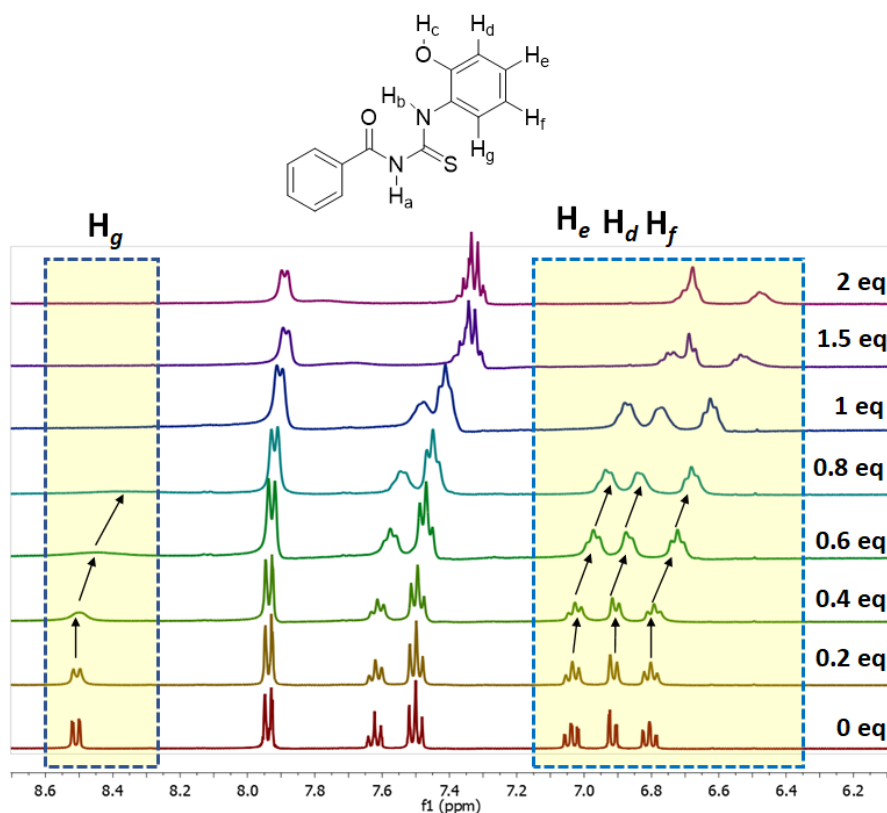

**Figure S55:** Expanded spectrum (with emphasis on the  $\text{H}_g$ ,  $\text{H}_e$ ,  $\text{H}_d$  and  $\text{H}_f$  protons) of titration of **C2** ( $7.32 \times 10^{-2}$  M) with TBAF (0-2 eq.) recorded by  $^1\text{H}$  NMR spectroscopy ( $\text{DMSO-}d_6$ , 298 K).

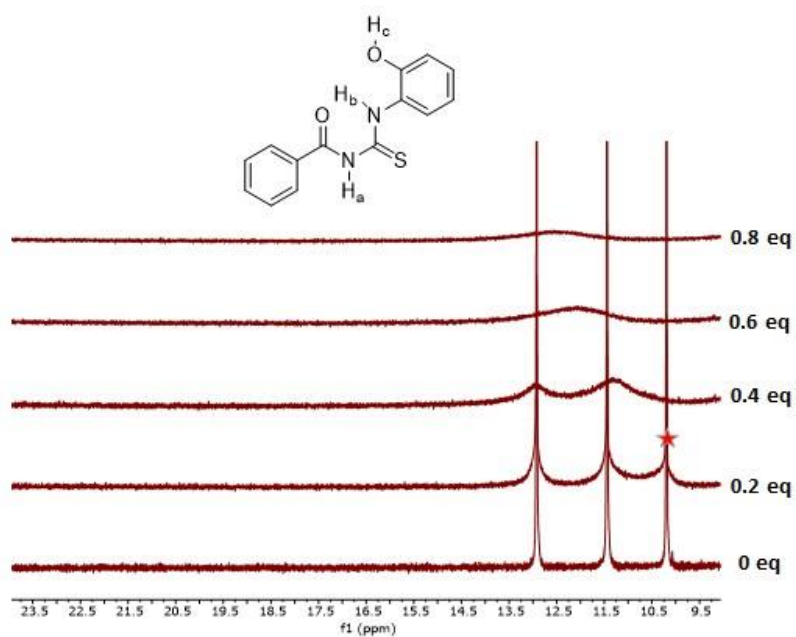

**Figure S56:** Expanded spectrum (with emphasis on  $-\text{OH}_c$  proton) of titration of **C2** ( $7.32 \times 10^{-2}$  M) with TBAF (0-0.8 eq.) recorded by  $^1\text{H}$  NMR spectroscopy ( $\text{DMSO}-d_6$ , 298 K).

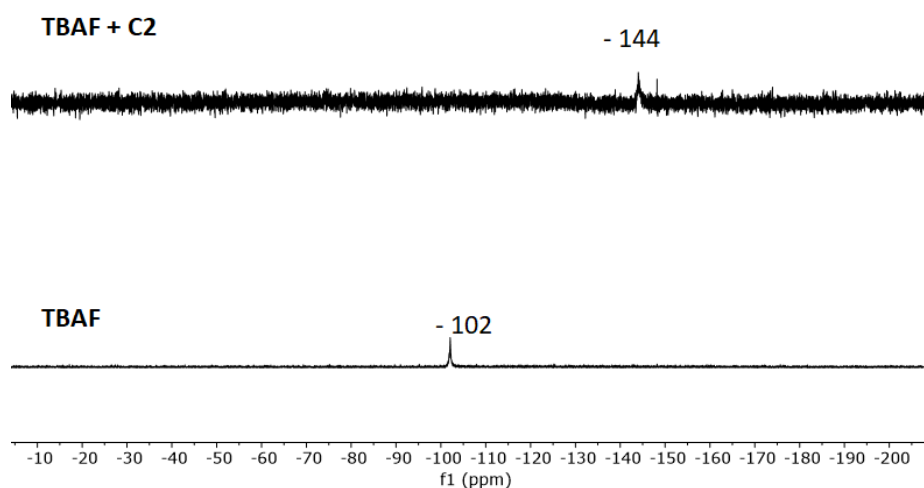

**Figure S57:** TBAF ( $2 \times 10^{-3}$  M) in presence of **C2** (1 eq.) recorded by  $^{19}\text{F}$  NMR spectroscopy ( $\text{DMSO}-d_6$ , 298 K).

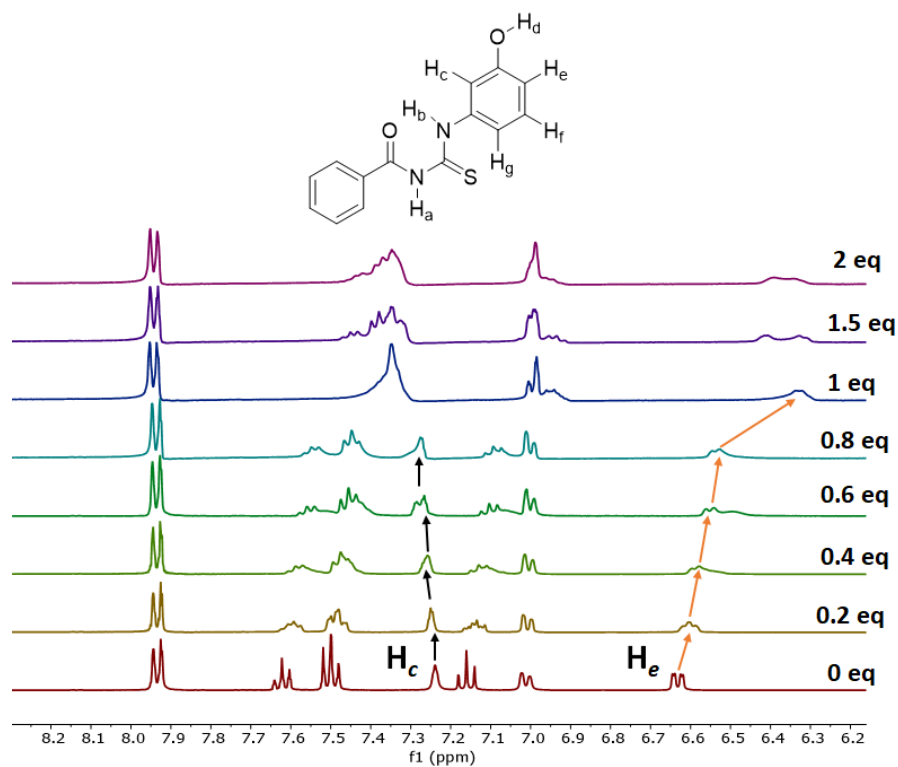

**Figure S58:** Expanded spectrum (with emphasis on the  $\text{H}_c$  and  $\text{H}_e$  protons) of titration of **C3** ( $7.32 \times 10^{-2}$  M) with TBAF (0-2 eq.) recorded by  $^1\text{H}$  NMR spectroscopy ( $\text{DMSO-}d_6$ , 298 K).

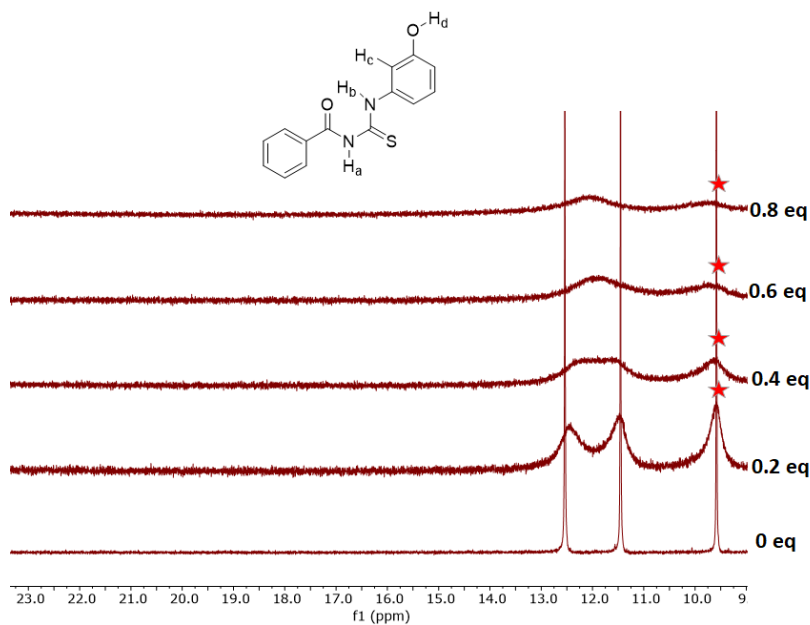

**Figure S59:** Expanded spectrum (with emphasis on  $-\text{OH}_d$  proton) of titration of **C2** ( $7.32 \times 10^{-2}$  M) with TBAF (0-0.8 eq.) recorded by  $^1\text{H}$  NMR spectroscopy ( $\text{DMSO-}d_6$ , 298 K).

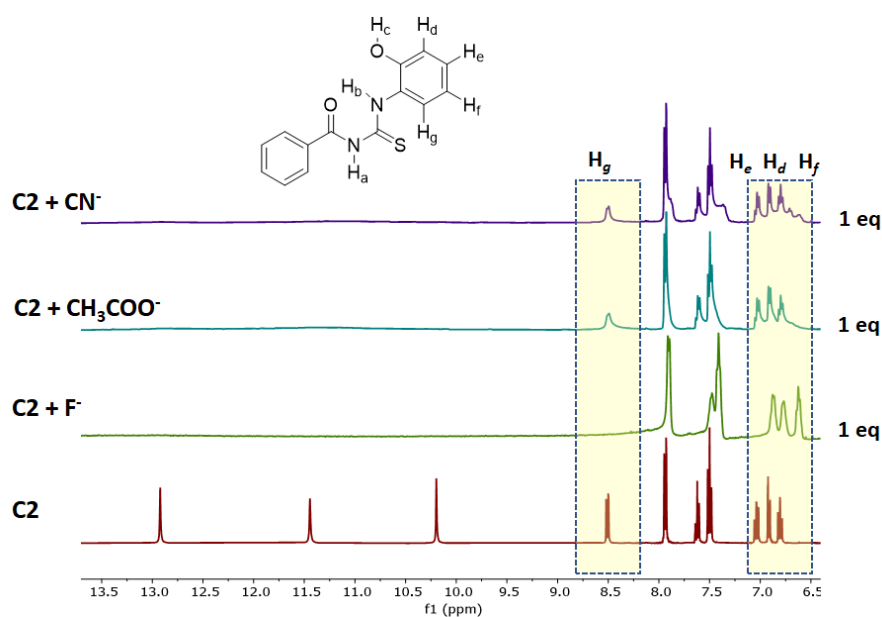

**Figure S60:** Response of **C2** ( $7.32 \times 10^{-2}$  M) (with emphasis on  $H_g$ ,  $H_e$ ,  $H_d$  and  $H_f$  protons) in presence of  $F^-$ ,  $CN^-$  and  $CH_3COO^-$  recorded by  $^1H$  NMR spectroscopy ( $DMSO-d_6$ , 298 K).

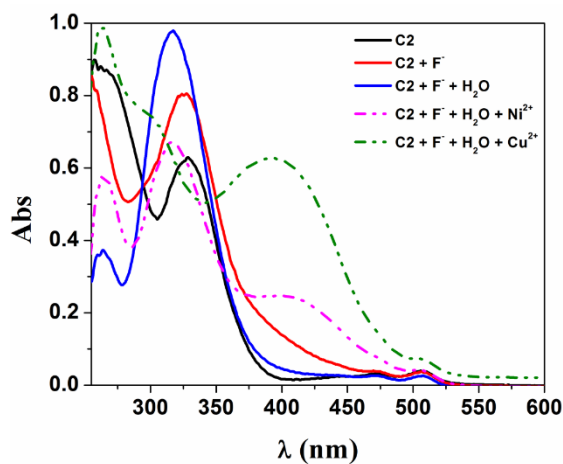

**Figure S61:** UV-Vis response after sequential addition of  $H_2O$  to the **C2.F<sup>-</sup>** ( $[C2] = 6.2 \times 10^{-5}$  M,  $[F^-] = 1.53 \times 10^{-3}$  M) complex followed by addition of aqueous metal chloride salt ( $[Ni^{2+}] = 7.5 \times 10^{-4}$  M and  $[Cu^{2+}] = 3.8 \times 10^{-5}$  M) solution.

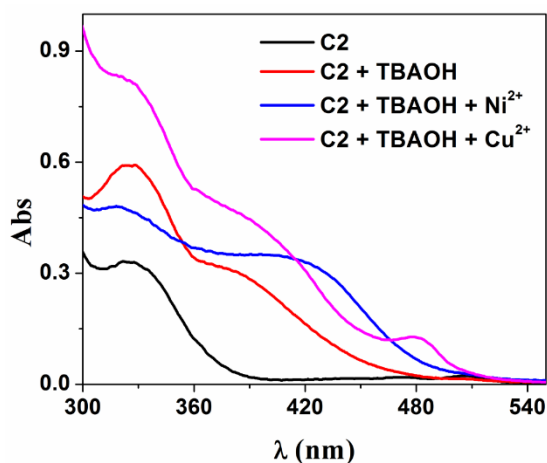

**Figure S62:** UV-Vis spectrum after sequential addition of TBAOH ( $[\text{OH}^-] = 1.53 \times 10^{-3} \text{ M}$ ) solution to **C2** ( $[\text{C2}] = 6.2 \times 10^{-5} \text{ M}$ ) in DMSO followed by addition of aqueous metal salt ( $\text{NiCl}_2 \cdot 6\text{H}_2\text{O}$  /  $\text{CuCl}_2 \cdot 2\text{H}_2\text{O}$ ) solution.

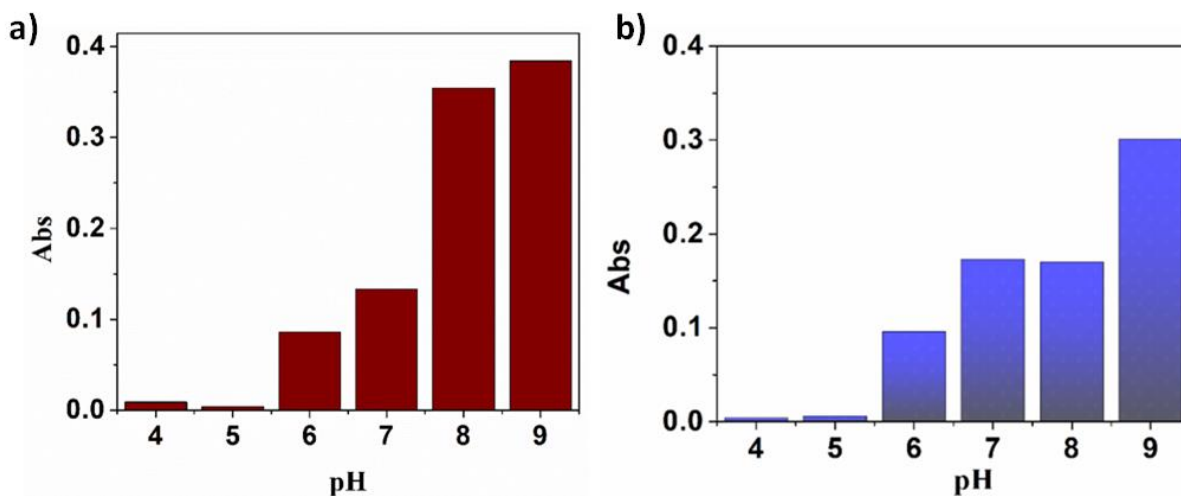

**Figure S63:** a) Study on effect of pH on fluoride sensing by **C2** in presence of aqueous  $\text{NiCl}_2$  in HEPES buffer (DMSO:Water = 7:3, pH = 7.2) at  $\lambda_{\text{max}} = 415 \text{ nm}$ ; b) Study on effect of pH on fluoride sensing by **C2** in presence of aqueous  $\text{CuCl}_2$  in HEPES buffer (DMSO:Water = 7:3, pH = 7.2) at  $\lambda_{\text{max}} = 425 \text{ nm}$ .



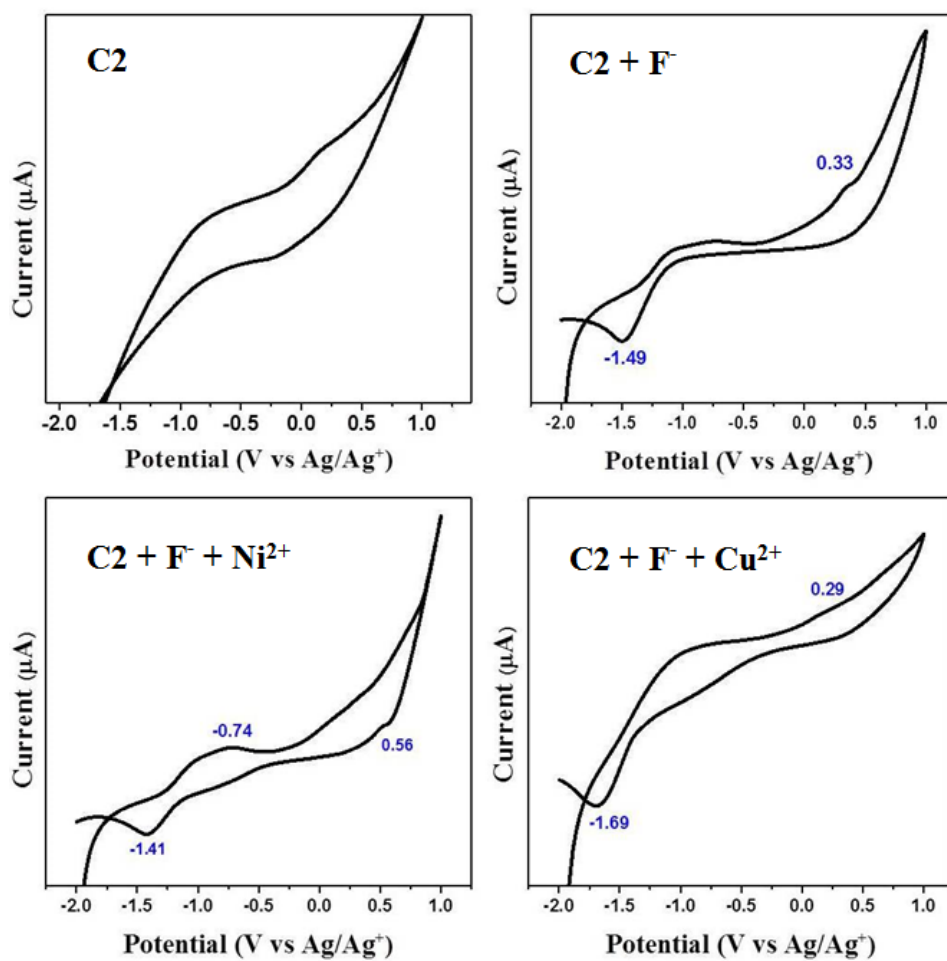

**Figure S64:** Cyclic Voltammogram recorded in *n*-Bu<sub>4</sub>NClO<sub>4</sub>/DMSO: a) C2 in DMSO; b) C2 + TBAF in DMSO; c) C2 + TBAF + NiCl<sub>2</sub>·6H<sub>2</sub>O in DMSO/H<sub>2</sub>O mixture; d) C2 + TBAF + CuCl<sub>2</sub>·2H<sub>2</sub>O in DMSO/H<sub>2</sub>O mixture.

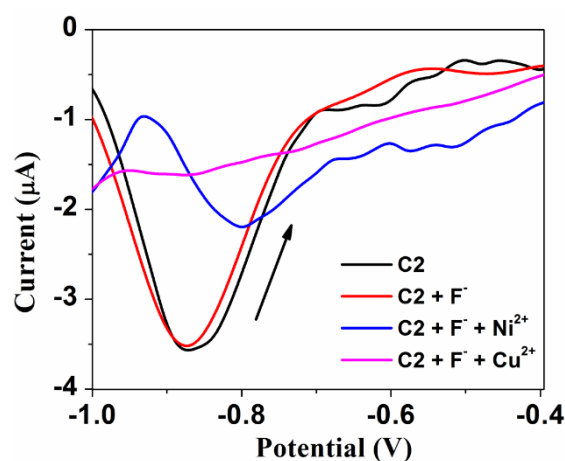

**Figure S65:** Changes in the DPV (vs Ag/Ag<sup>+</sup>) curves w.r.t. the ligand based peak of **C2** in presence of *n*-Bu<sub>4</sub>NCIO<sub>4</sub> (0.1 M) upon sequential addition TBAF solution followed by aqueous metal salt solution to a **C2** solution in DMSO. Changes in the curves (Black: **C2** solution in DMSO; red: **C2** + TBAF in DMSO; blue: **C2** + TBAF + NiCl<sub>2</sub> in DMSO/water mixture; pink: **C2** + TBAF + NiCl<sub>2</sub> in DMSO/water mixture).

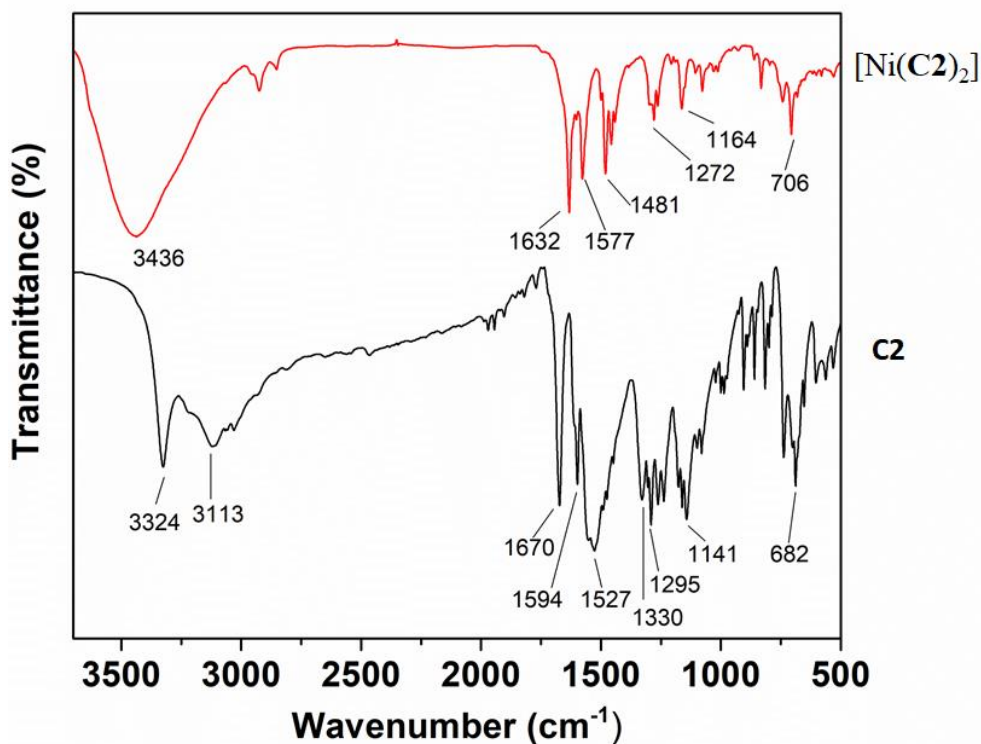

**Figure S66:** IR spectrum of **C2** and [Ni(C2)<sub>2</sub>] collected in ATR mode.

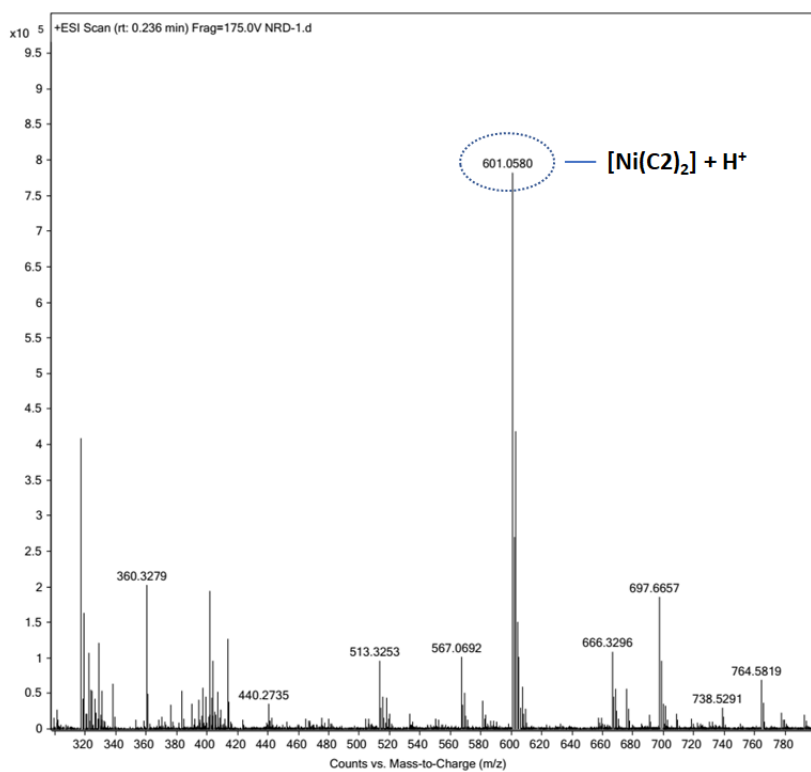

**Figure S67:** ESI mass spectra of  $[\text{Ni}(\text{C}_2)_2]$ .

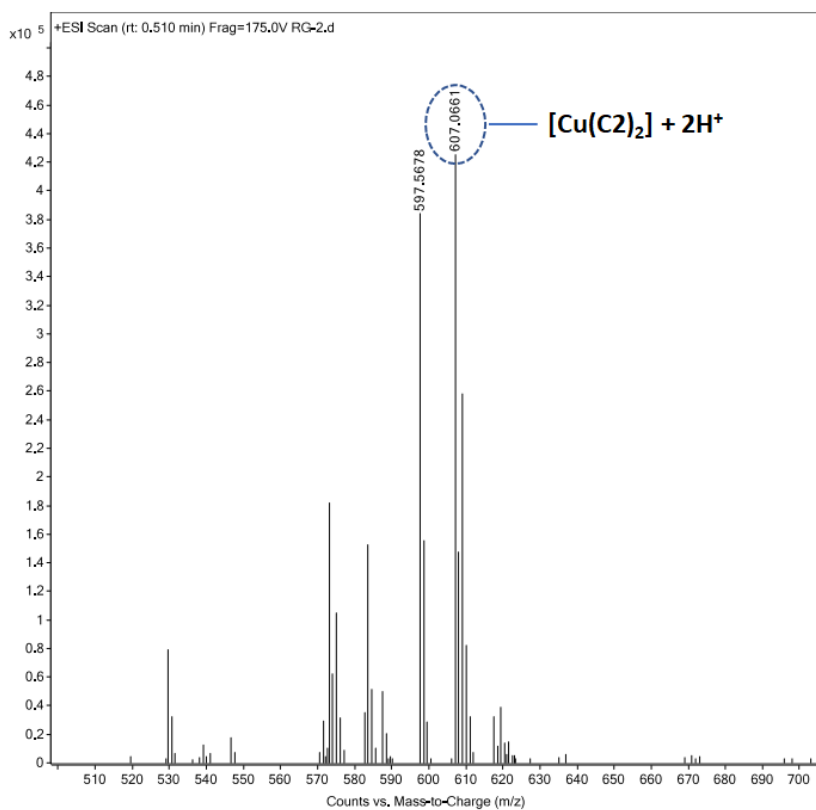

**Figure S68:** ESI mass spectra of  $[\text{Cu}(\text{C}_2)_2]$ .

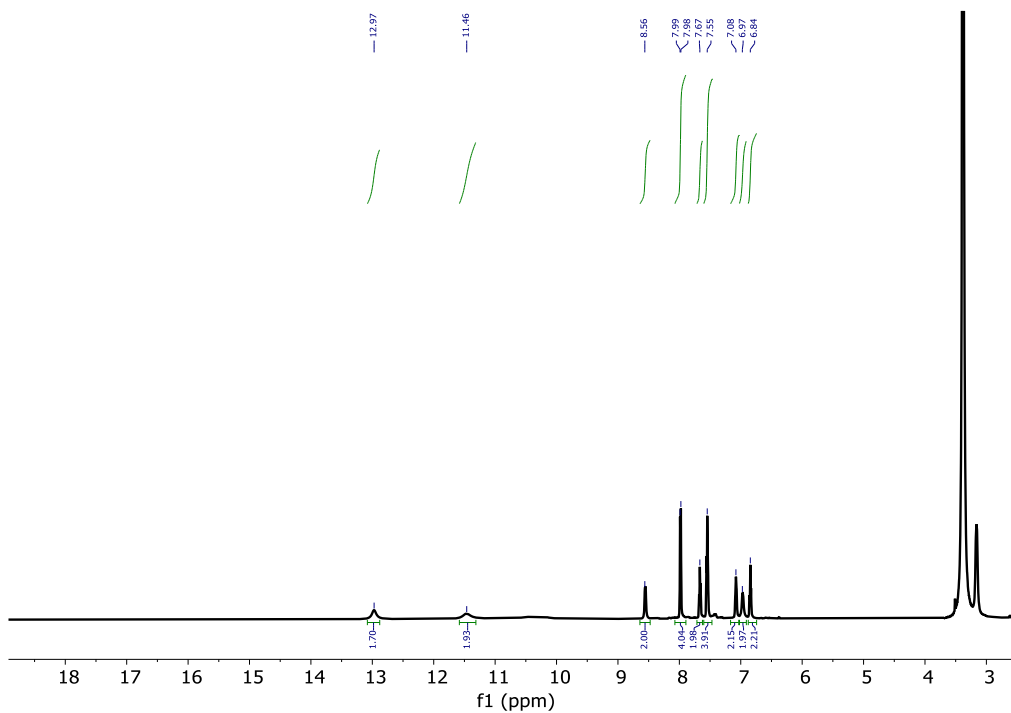

**Figure S69:**  $^1\text{H}$  NMR spectrum of *in situ* metal complex formed for **C2** ( $7.32 \times 10^{-2}$  M) in presence of  $\text{Ni}^{2+}$  ions (0.5 equiv.) and  $\text{F}^-$  (0.5 equiv.) in  $\text{DMSO-}d_6$  at 298K.

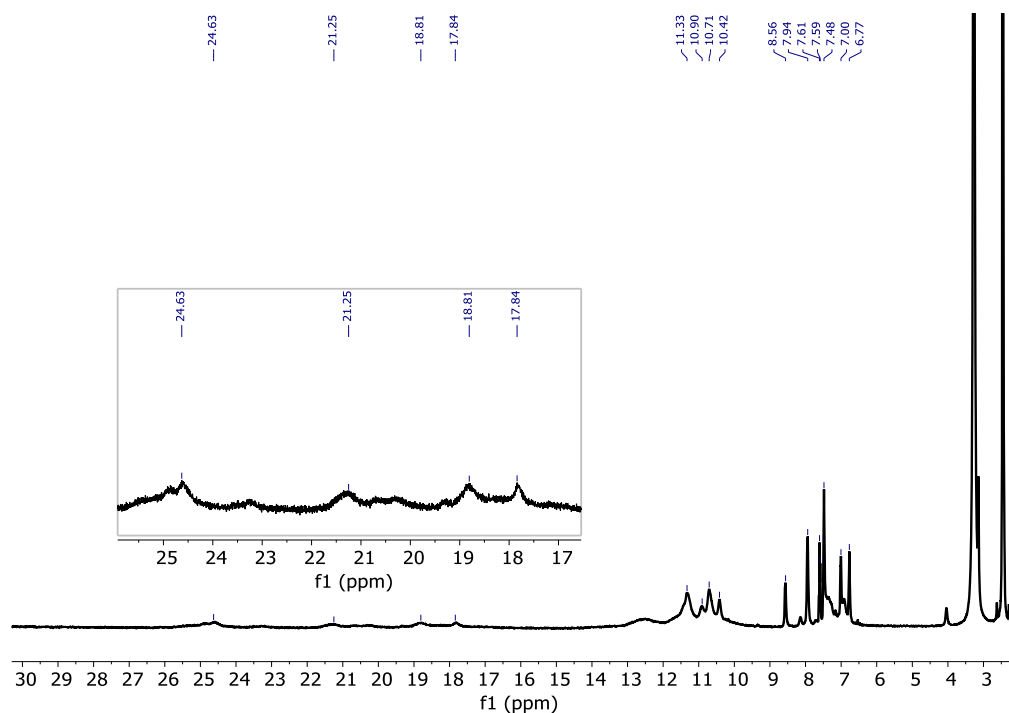

**Figure S70:**  $^1\text{H}$  NMR spectrum of *in situ* metal complex formed for **C2** ( $7.32 \times 10^{-2}$  M) in presence of  $\text{Cu}^{2+}$  ions (0.5 equiv.) and  $\text{F}^-$  (0.5 equiv.) in  $\text{DMSO-}d_6$  at 298K.

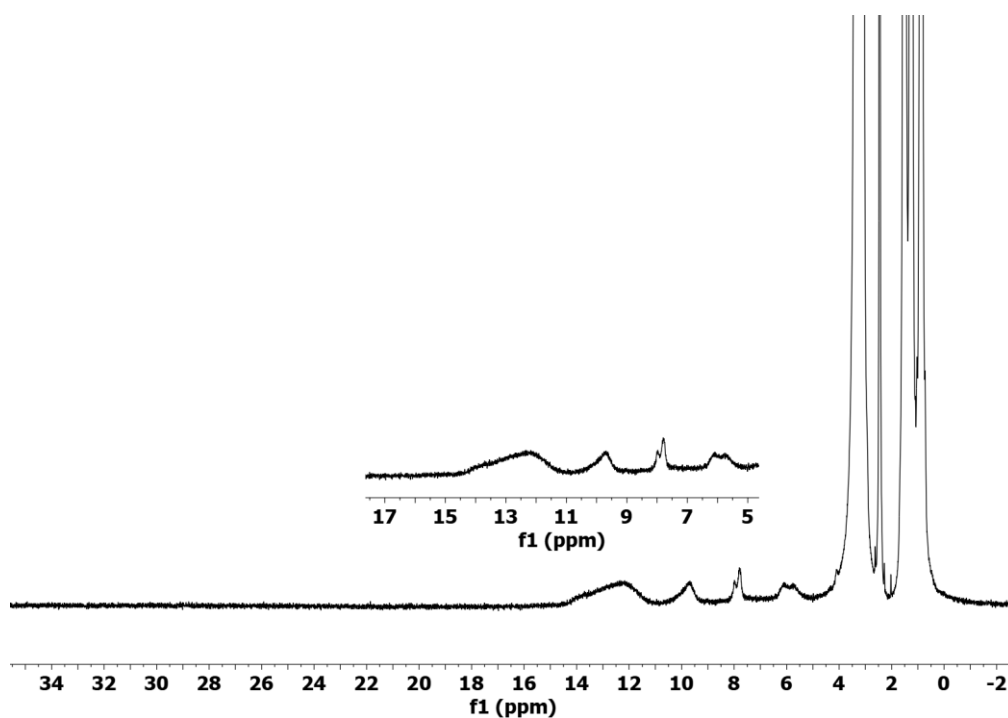

**Figure S71:**  $^1\text{H}$  NMR spectrum of the isolated yellow  $\text{Cu(II)}$  complex in  $\text{DMSO-}d_6$  at 298K.

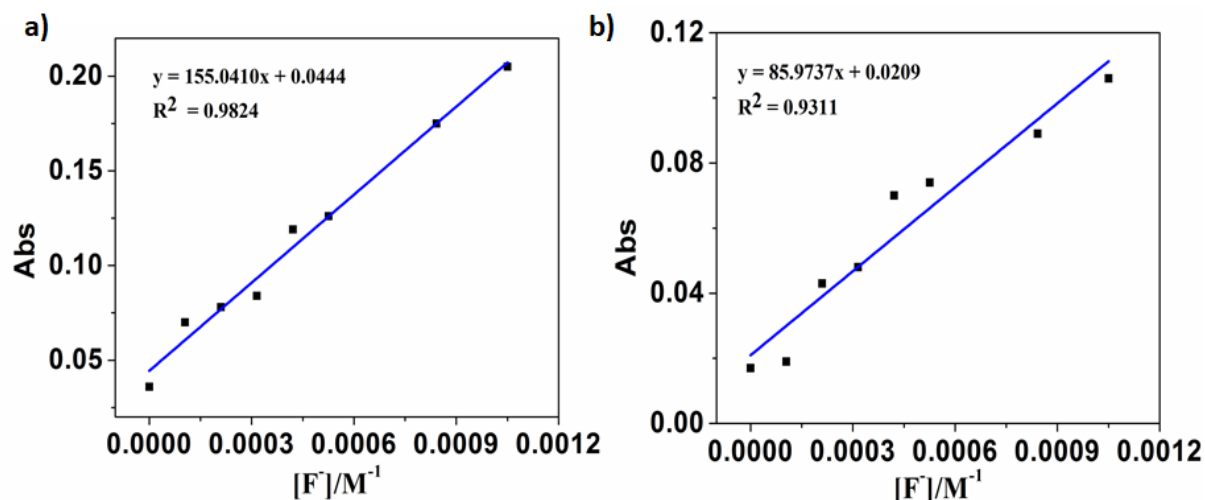

**Figure S72:** a) Calibration curve for determining the concentration of fluoride (as NaF in H<sub>2</sub>O) in a sample  $\lambda_{\text{max}} = 406$  nm.  $[\text{C2}] = 6.2 \times 10^{-5}$  M;  $[\text{Cu}^{2+}] = 7.5 \times 10^{-5}$  M; b) Calibration curve for determining the concentration of fluoride (as NaF in H<sub>2</sub>O) in a sample at  $\lambda_{\text{max}} = 420$  nm.  $[\text{C2}] = 6.2 \times 10^{-5}$  M;  $[\text{Ni}^{2+}] = 7.5 \times 10^{-5}$  M.

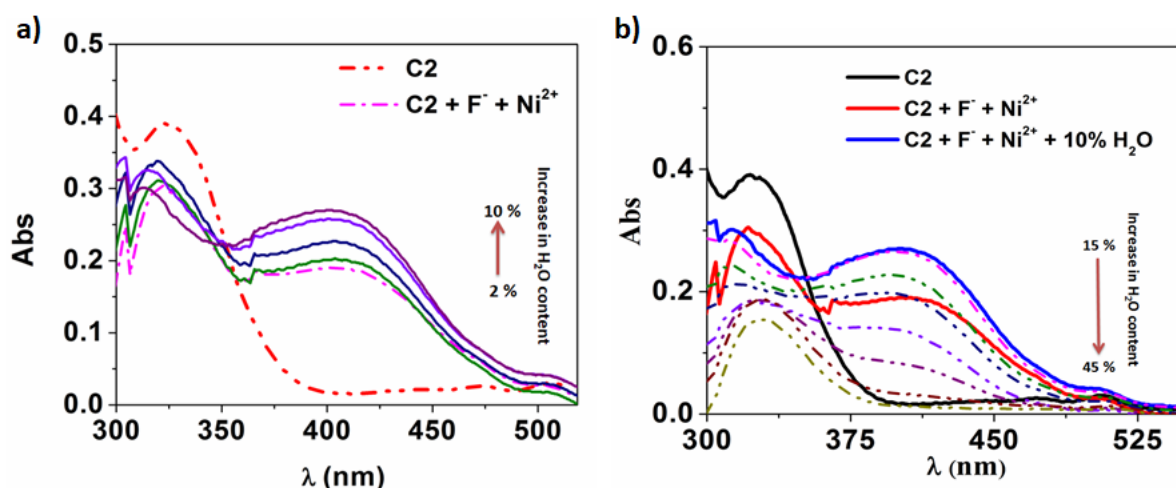

**Figure S73:** a) UV-Vis spectra of (C2 + F<sup>-</sup> + Ni<sup>2+</sup>) ( $[\text{C2}] = 6.2 \times 10^{-5}$  M,  $[\text{F}^-] = 1.53 \times 10^{-3}$  M,  $[\text{Ni}^{2+}] = 7.5 \times 10^{-4}$  M) showing initial increase in the absorbance at  $\lambda_{\text{max}} = 404$  nm upon addition of H<sub>2</sub>O (upto 10% of total volume); b) UV-Vis spectra of (C2 + F<sup>-</sup> + Ni<sup>2+</sup>) ( $[\text{C2}] = 6.2 \times 10^{-5}$  M,  $[\text{F}^-] = 1.53 \times 10^{-3}$  M,  $[\text{Ni}^{2+}] = 7.5 \times 10^{-4}$  M) showing subsequent decrease in the absorbance (represented by dotted lines) at  $\lambda_{\text{max}} = 404$  nm after addition of H<sub>2</sub>O (10% onwards).

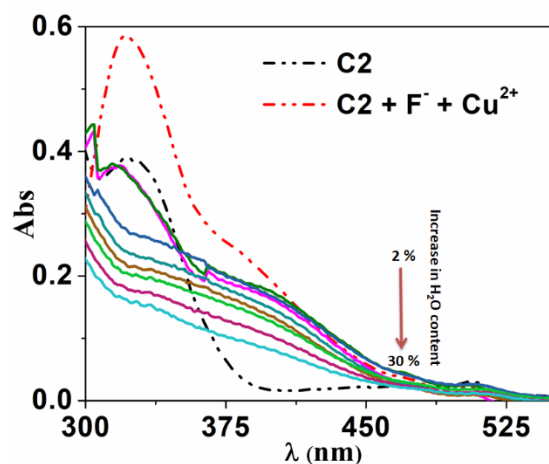

**Figure S74:** UV-Vis spectra of (C2 + F<sup>-</sup> + Cu<sup>2+</sup>) ([C2] = 6.2 × 10<sup>-5</sup> M, [F<sup>-</sup>] = 1.53 × 10<sup>-3</sup> M, [Cu<sup>2+</sup>] = 3.8 × 10<sup>-5</sup> M) showing decrease in the absorbance at λ<sub>max</sub> = 374 nm upon addition of H<sub>2</sub>O.

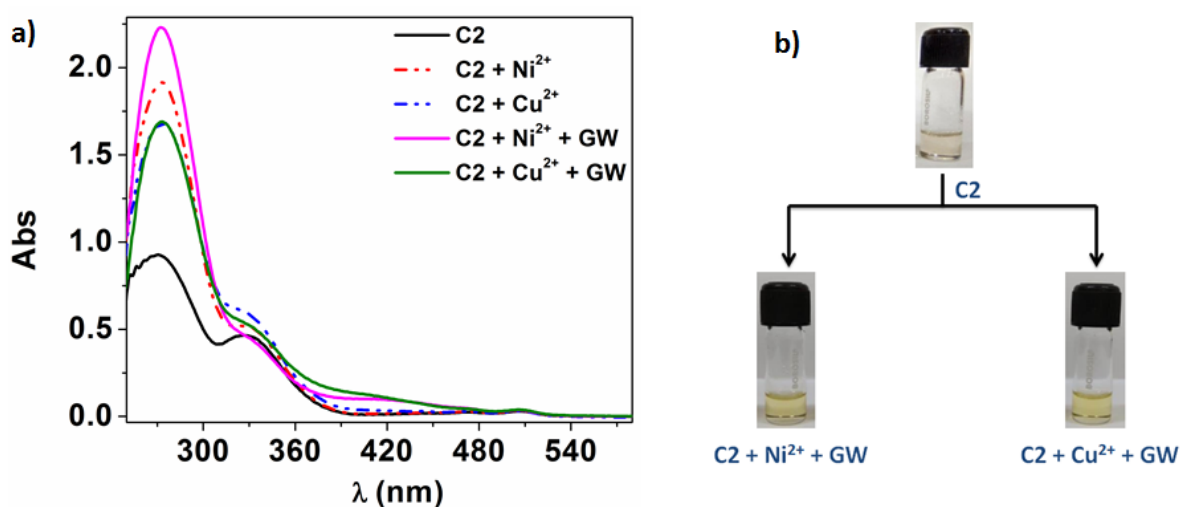

**Figure S75:** a) UV-Vis spectra upon sequential addition of groundwater samples (GW) to C2 ([C2] = 6.2 × 10<sup>-5</sup> M) in DMSO in presence of aqueous Ni<sup>2+</sup> ([Ni<sup>2+</sup>] = 7.5 × 10<sup>-4</sup> M) ions and Cu<sup>2+</sup> ions ([Cu<sup>2+</sup>] = 3.8 × 10<sup>-5</sup> M). b) Colour change observed upon addition of 20 μL groundwater samples (GW) to C2 in DMSO in presence of aqueous Ni<sup>2+</sup> ions and Cu<sup>2+</sup> ions.

**Table S2: Literature reports on transition metal based fluoride sensor**

| S. No. | Metal receptor system                                         | Fluoride Salt | LOD                      | Solvent used for study | Reference                                                                                |
|--------|---------------------------------------------------------------|---------------|--------------------------|------------------------|------------------------------------------------------------------------------------------|
| 1      | Copper(II) bis(terpyridine) complex                           | TBAF          | 5.07 $\mu\text{M}$       | Acetonitrile           | P. K. Kar and co-workers, <i>Photochem. Photobiol. Sci.</i> , 2018, <b>17</b> , 815-821. |
| 2      | Co(II) Hexacarboxamide Cryptand Complex                       | TBAF          | 2-5 ppm                  | DMF                    | C. C. Cummins and co-workers, <i>Inorg. Chem.</i> 2017, <b>56</b> , 7615–7619.           |
| 3      | Zn(II) tripodal complex                                       | TBAF/<br>NaF  | $4.84 \times 10^{-12}$ M | Water                  | N. Singh and co-workers, <i>Dalton Trans.</i> , 2015, <b>44</b> , 12589-12597.           |
| 4      | 2,4-dihydroxybenzaloxime complex of Cu(II), Ni(II) and Zn(II) | TBAF          | $4.86 \times 10^{-6}$ M  | DMSO                   | J. B. Baruah and co-workers, <i>RSC Adv.</i> , 2015, <b>5</b> , 82144-82152.             |
| 5      | Ru(II) complex                                                | TBAF          | -                        | Acetonitrile           | G. K. Lahiri and co-workers, <i>Dalton Trans.</i> , 2012, <b>41</b> , 4484-4496.         |
| 6      | Fe(III) complex                                               | NaF           | 140 $\mu\text{M}$        | DMSO/Water (3:7)       | Z. Shen and co-workers, <i>Tetrahedron</i> , 2011, <b>67</b> , 7909-7912.                |
| 7      | Co(II) thiazoline based complex                               | NaF           | -                        | DMF/water (9:1)        | C.-S. Ha and co-workers, <i>Dalton Trans.</i> , 2009, <b>47</b> , 10422-10425.           |
| 8      | Zr(IV) EDTA flavonol complex                                  | NaF           | $3 \times 10^{-6}$ M     | Water                  | T. M. Suzuki and co-workers, <i>J. Chem. Soc.</i> ,                                      |



|    |                                                                         |                      |                       |                   |                                                                                  |
|----|-------------------------------------------------------------------------|----------------------|-----------------------|-------------------|----------------------------------------------------------------------------------|
|    |                                                                         |                      |                       |                   | <i>Perkin Trans. 2</i> , 2002, 759–762.                                          |
| 9  | Zn(II)Terpyridine–Triarylborane Conjugates                              | TBAF                 | -                     | THF               | M. H. Lee and co-workers, <i>Organometallics</i> , 2014, <b>33</b> , 753–762.    |
| 10 | Ru(II)-bipy based complex                                               | TBAF                 | 1 ppm-10 ppm          | Acetonitrile      | Z. Bai and co-workers, <i>Dalton Trans.</i> , 2006, <b>30</b> , 3678–3684.       |
| 11 | amino-naphthoquinone based Co(II), Ni(II), Cu(II), and Zn(II) complexes | TBAF                 | 0.006 $\mu$ M         | DMF/water (3:7)   | K. P. Elango and co-workers, <i>RSC Adv.</i> , 2016, <b>6</b> , 91265–91274.     |
| 12 | Cu(I) Schiff base complex                                               | TBAF/<br>NaF         | 0.12 $\mu$ M          | DMSO/Water        | S. P. Mahanta and co-workers, <i>New J. Chem.</i> , 2018, <b>42</b> , 3758-3764. |
| 13 | Cu(I) DPQ complex                                                       | TBAF/<br>NaF         | 0.15 ppm              | DMSO/Water        | S. P. Mahanta and co-workers, <i>New J. Chem.</i> , 2019, <b>43</b> , 3447-3453  |
| 14 | Al(III) Schiff base complex                                             | TBAF/<br>KF          | $2 \times 10^{-12}$ M | Water             | P. Mal and co-workers, <i>Dalton Trans.</i> , 2021, 50, 3027-3036                |
| 15 | <b>This work</b>                                                        | <b>TBAF/<br/>NaF</b> | <b>1.07 ppm</b>       | <b>DMSO/Water</b> |                                                                                  |

## Theoretical Studies:

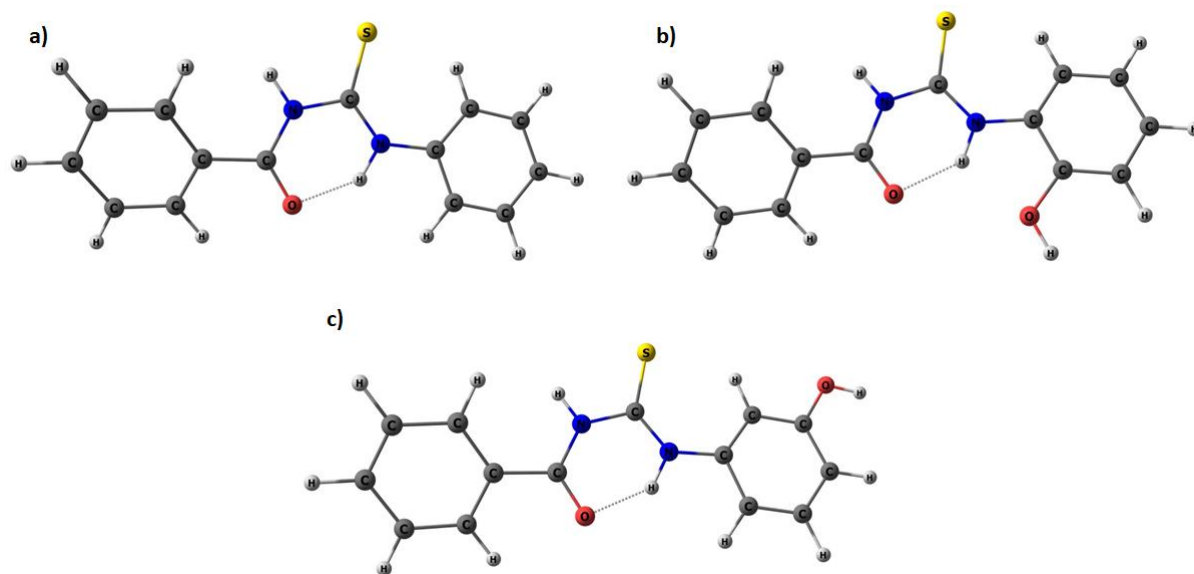

**Figure S76:** DFT optimized structure of a) C1, b) C2, c) C3.

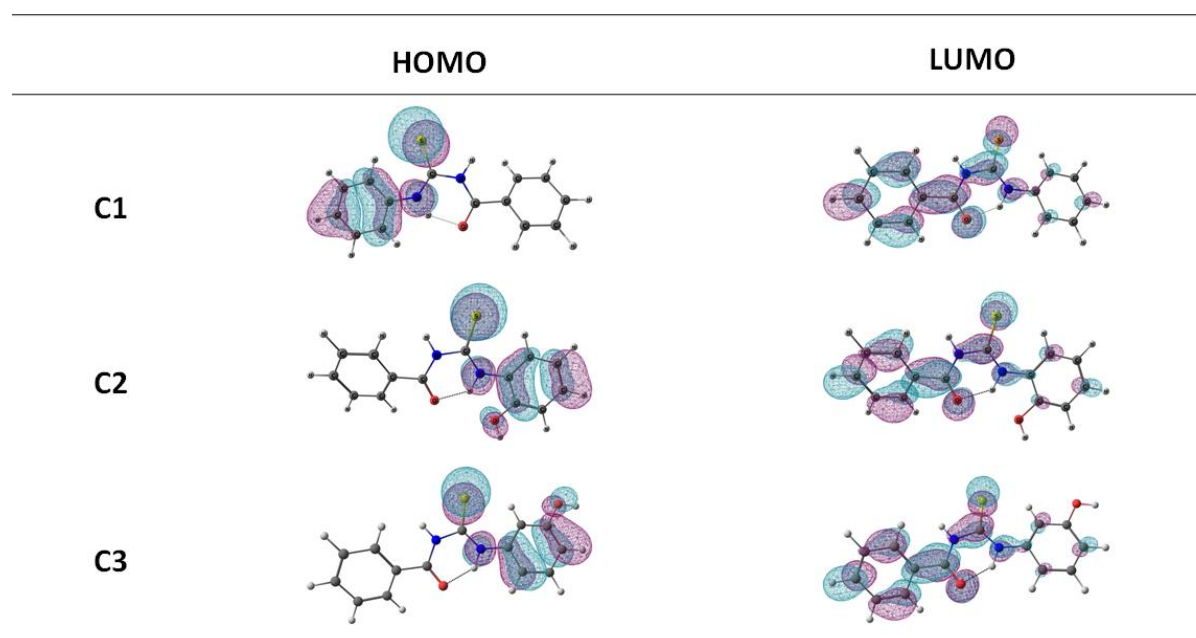

**Figure S77:** HOMO and LUMO of C1, C2 and C3.

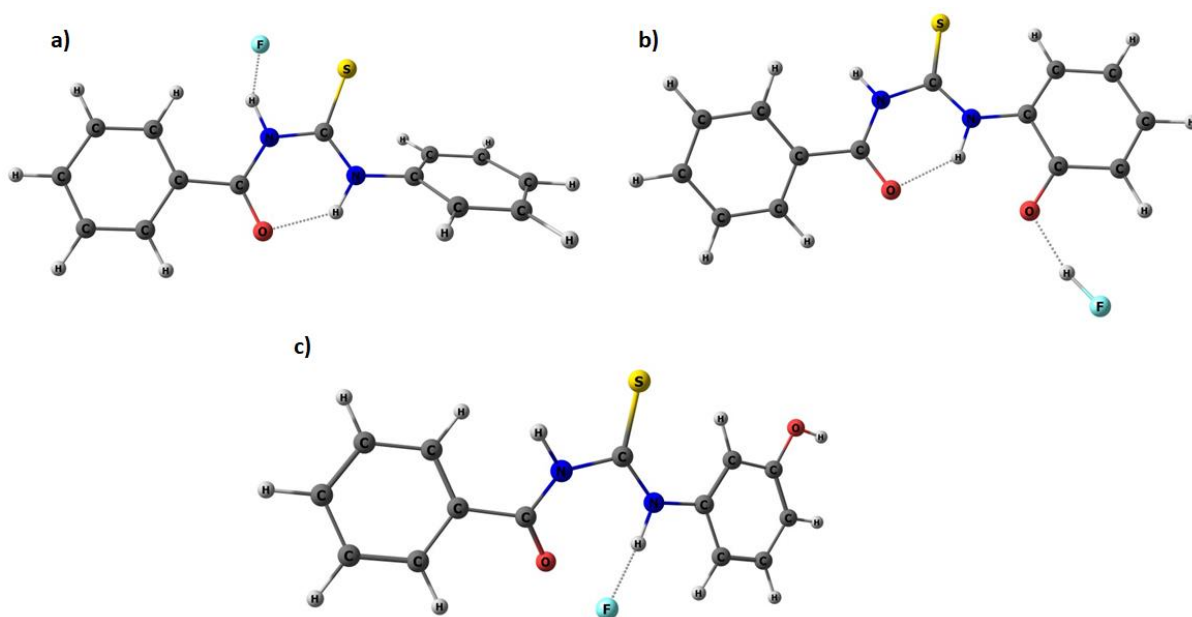

**Figure S78:** Structures for interaction of  $F^-$  with a) C1, b) C2 and c) C3

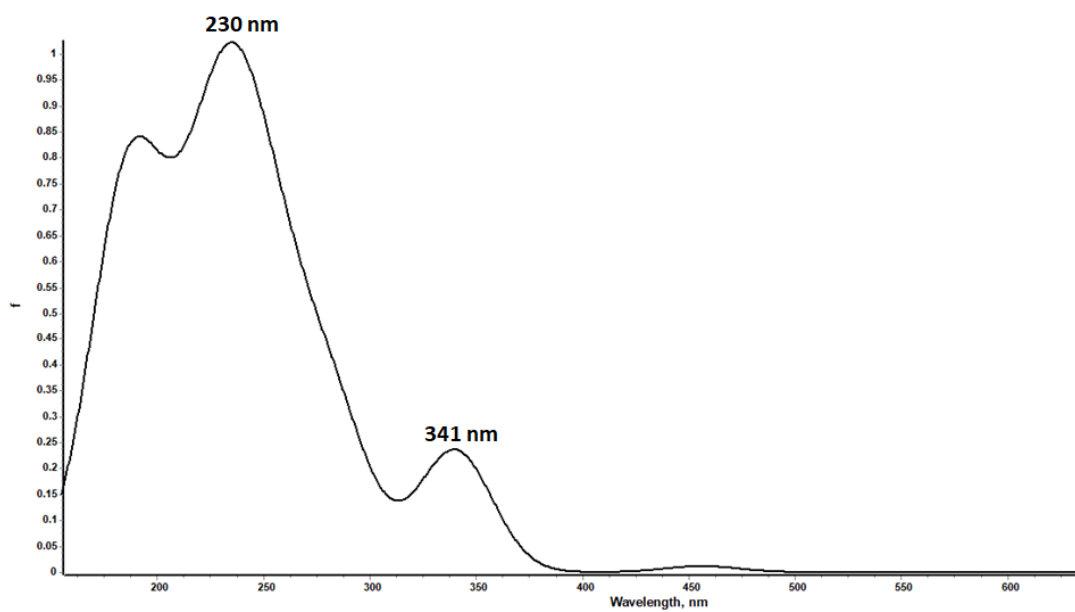

**Figure S79:** UV-Vis spectrum of  $C2.F$  complex simulated from the TD-DFT calculation.

|        |        |
|--------|--------|
| 395.96 | 0      |
| 355.26 | 0      |
| 345.92 | 0      |
| 333.61 | 0      |
| 326.3  | 0.0002 |
| 290.82 | 0      |
| 284.03 | 0      |
| 279.83 | 0      |
| 277.93 | 0.4567 |
| 267.41 | 0      |
| 265.6  | 0      |
| 259.29 | 0.09   |
| 254.09 | 0      |
| 249.28 | 0.6141 |
| 246.02 | 0.0846 |
| 245.55 | 0      |
| 239.13 | 0.0403 |
| 233.83 | 0      |
| 230.91 | 0      |
| 222.99 | 0.0531 |
| 213.4  | 0.0844 |
| 211.07 | 0      |
| 209.21 | 0.0124 |
| 207.6  | 0      |
| 204.23 | 0.1537 |

**Table S3:** TD f-values of the obtained UV-Vis spectrum for C2.F<sup>-</sup> complex.

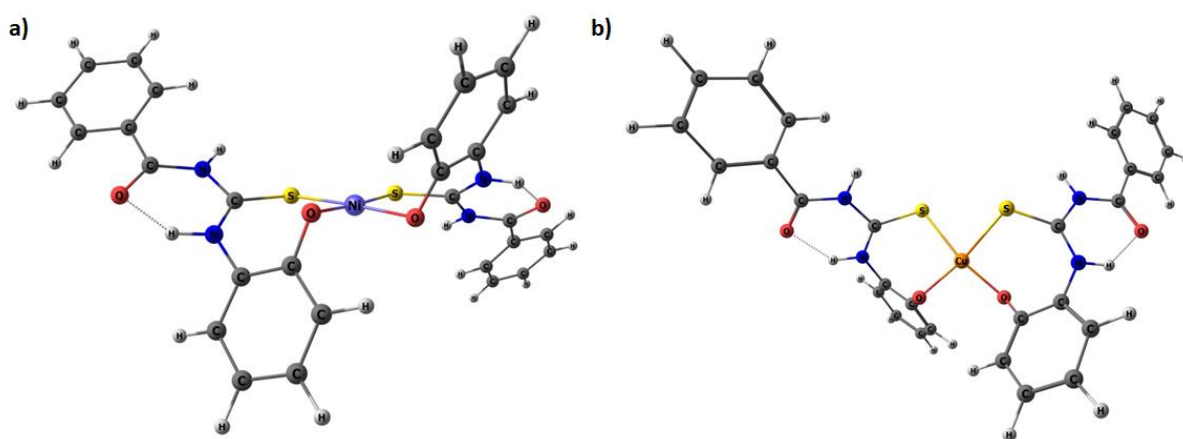

**Figure S80:** DFT optimized structure of a) [Ni(C2)<sub>2</sub>] and b) [Cu(C2)<sub>2</sub>] complex.

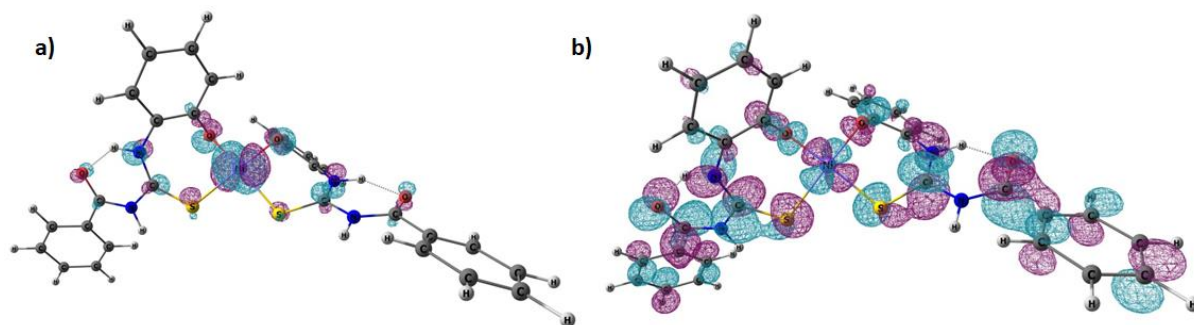

**Figure S81:** a) HOMO and b) LUMO of  $[\text{Ni}(\text{C}_2)_2]$  complex

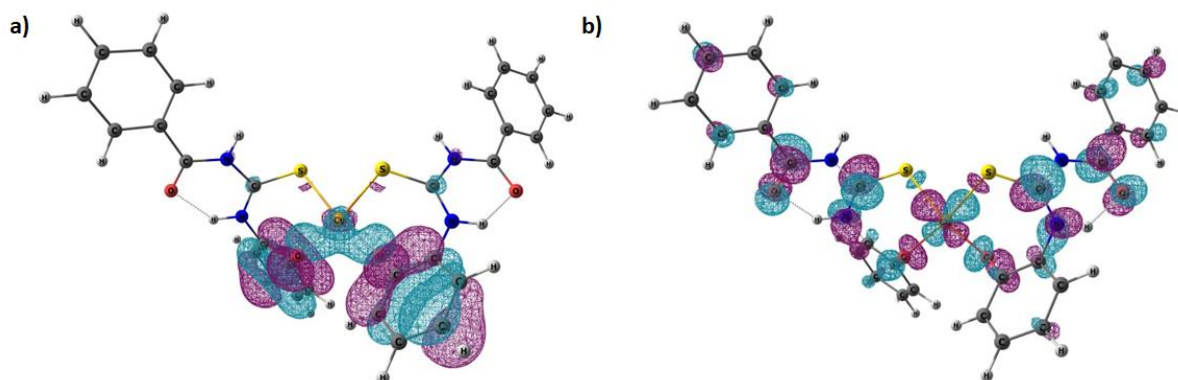

**Figure S82:** a) HOMO and b) LUMO of  $[\text{Cu}(\text{C}_2)_2]$  complex

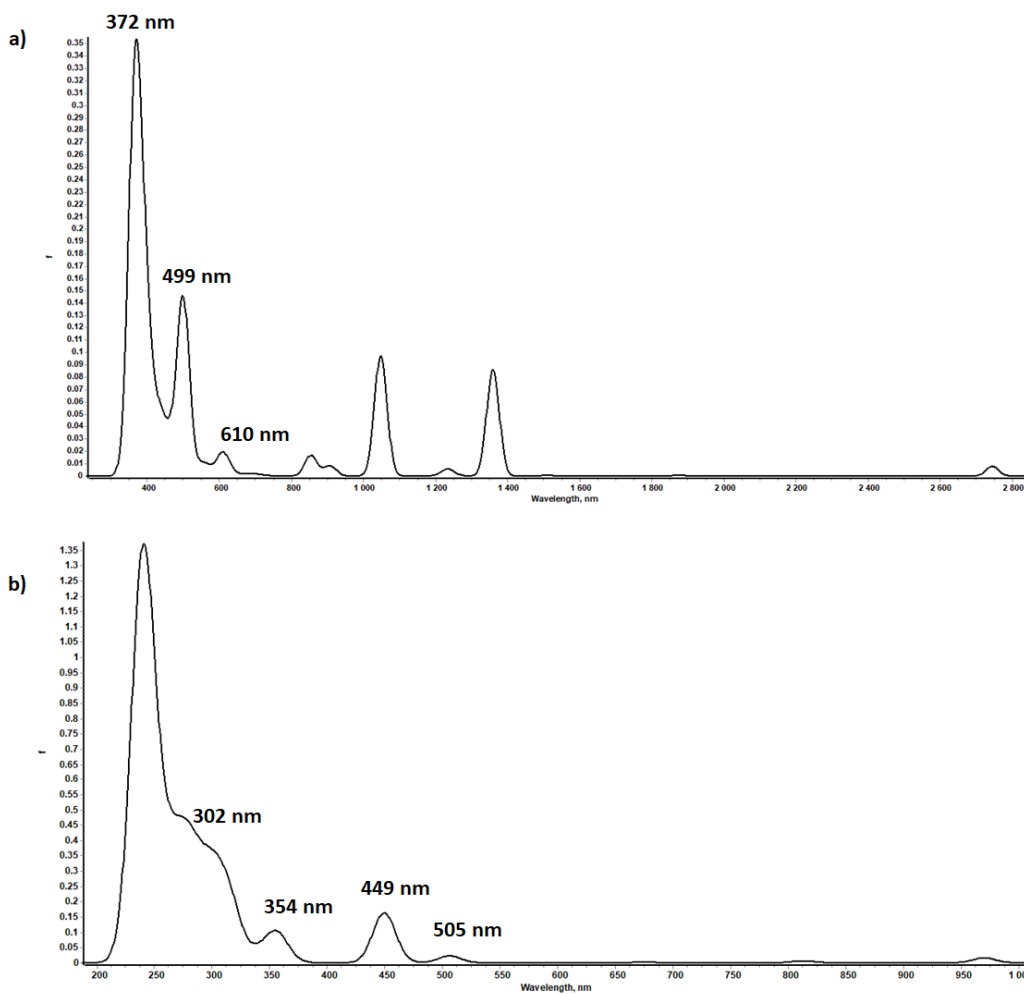

**Figure S83:** UV-Vis spectrum of a) [Ni(C2)<sub>2</sub>] and b) [Cu(C2)<sub>2</sub>] complex simulated from the TD-DFT calculation

|        |        |
|--------|--------|
| 716.67 | 0.0008 |
| 686.64 | 0.0017 |
| 642.72 | 0.002  |
| 610.41 | 0.0186 |
| 589.84 | 0.0002 |
| 588.32 | 0.0012 |
| 565.22 | 0.0011 |
| 562.08 | 0.0002 |
| 557.99 | 0.007  |
| 549.41 | 0.0015 |
| 547.57 | 0.0004 |
| 526.71 | 0.0013 |
| 499.89 | 0.1401 |
| 481.3  | 0.0054 |
| 474.69 | 0.0006 |
| 471.64 | 0.0048 |

|        |        |
|--------|--------|
| 467.79 | 0.0023 |
| 450.87 | 0.012  |
| 447.62 | 0.0042 |
| 445.4  | 0.0076 |
| 441.6  | 0.0089 |
| 439.88 | 0.0003 |
| 439.54 | 0.0001 |
| 432.61 | 0.0011 |
| 429.2  | 0.0056 |
| 424.29 | 0.0076 |
| 415.56 | 0.0217 |
| 414.71 | 0.0026 |
| 407.51 | 0.003  |
| 405.27 | 0.0005 |
| 397.46 | 0.0219 |
| 395.47 | 0.0309 |
| 392.64 | 0.004  |
| 388.57 | 0.0418 |
| 378.09 | 0.0034 |
| 375.58 | 0.028  |
| 372.69 | 0.022  |
| 371.77 | 0.0026 |
| 369.37 | 0.1499 |
| 366.63 | 0.0006 |
| 365.55 | 0.0017 |
| 360.86 | 0.0742 |
| 359.2  | 0.0037 |
| 358.33 | 0.0455 |

**Table S4:** TD f –values of the obtained UV-Vis spectrum for [Ni(C2)<sub>2</sub>]

|        |        |
|--------|--------|
| 671.97 | 0.0001 |
| 505.85 | 0.0231 |
| 469.63 | 0.0014 |
| 449.48 | 0.1634 |
| 361.49 | 0.0235 |
| 360.72 | 0.0003 |
| 354.92 | 0.0031 |
| 354.51 | 0.0743 |
| 348.87 | 0.0001 |
| 346.18 | 0.0069 |
| 338.52 | 0.0159 |
| 332.68 | 0.009  |
| 328.3  | 0.0013 |

|        |        |
|--------|--------|
| 315.59 | 0.0841 |
| 315.43 | 0.0915 |
| 302.04 | 0.1404 |
| 300.72 | 0.0627 |
| 300.56 | 0.0018 |
| 296.36 | 0.0091 |
| 295.74 | 0.0123 |
| 293.57 | 0.0025 |
| 291.48 | 0.0453 |
| 289.31 | 0.0058 |
| 288.13 | 0.0081 |
| 287.81 | 0.0609 |
| 283.54 | 0.0297 |
| 282.11 | 0.0196 |
| 278.39 | 0.1647 |
| 274.89 | 0.0612 |
| 274.6  | 0.0216 |
| 273.26 | 0.003  |
| 268.35 | 0.0223 |
| 267.61 | 0.0041 |
| 266.56 | 0.0696 |
| 265.76 | 0.0068 |
| 263.19 | 0.0266 |
| 261.18 | 0.0793 |
| 260.28 | 0.0457 |
| 258    | 0.0297 |
| 254.75 | 0.0167 |
| 254.65 | 0.009  |
| 250.64 | 0.0708 |

**Table S5:** TD f –values of the obtained UV-Vis spectrum for [Cu(C2)<sub>2</sub>]

Z-matrix of the Ligand C1

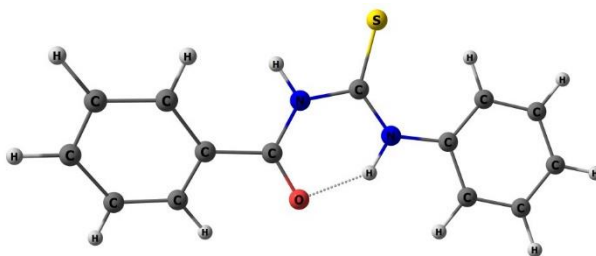



|   |              |              |              |
|---|--------------|--------------|--------------|
| C | -5.767244000 | -0.274963000 | 0.090635000  |
| C | -5.036419000 | 0.852362000  | 0.496190000  |
| C | -3.636432000 | 0.833208000  | 0.458242000  |
| C | -2.960970000 | -0.319169000 | 0.013103000  |
| C | -3.696043000 | -1.453777000 | -0.374229000 |
| C | -5.094704000 | -1.429349000 | -0.340979000 |
| C | -1.471789000 | -0.414705000 | -0.043540000 |
| N | -0.778611000 | 0.780040000  | -0.128689000 |
| C | 0.621015000  | 1.010659000  | -0.117941000 |
| N | 1.367259000  | -0.111822000 | -0.052440000 |
| C | 2.774446000  | -0.309205000 | 0.007973000  |
| C | 3.743613000  | 0.705087000  | -0.077599000 |
| C | 5.103271000  | 0.363586000  | -0.007706000 |
| C | 5.511030000  | -0.967799000 | 0.143728000  |
| C | 4.538320000  | -1.977837000 | 0.226129000  |
| C | 3.181757000  | -1.652431000 | 0.159013000  |
| O | -0.882343000 | -1.526699000 | -0.030479000 |
| S | 1.109633000  | 2.644895000  | -0.185242000 |
| H | -6.851349000 | -0.256351000 | 0.119757000  |
| H | -5.552981000 | 1.738004000  | 0.848538000  |
| H | -3.094016000 | 1.704034000  | 0.814860000  |
| H | -3.159073000 | -2.340288000 | -0.692459000 |
| H | -5.657356000 | -2.304305000 | -0.646581000 |
| H | -1.301568000 | 1.640501000  | -0.229774000 |
| H | 0.816435000  | -0.978943000 | -0.035345000 |
| H | 3.446316000  | 1.737031000  | -0.195652000 |
| H | 5.844984000  | 1.152532000  | -0.073543000 |
| H | 6.565288000  | -1.216172000 | 0.197569000  |

|   |             |              |             |
|---|-------------|--------------|-------------|
| H | 4.834701000 | -3.014503000 | 0.344227000 |
| H | 2.433598000 | -2.437806000 | 0.225892000 |

Z-matrix of the Ligand C2

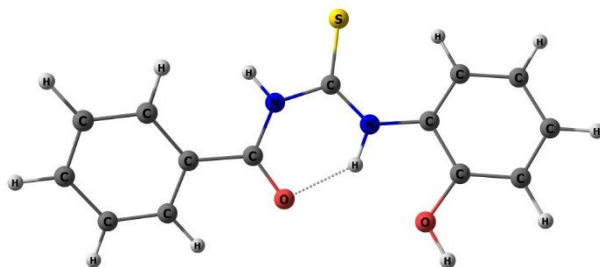

|   |              |              |              |
|---|--------------|--------------|--------------|
| C | 3.091787000  | -0.268864000 | -0.009935000 |
| C | 3.807712000  | -1.412493000 | 0.386130000  |
| H | 3.254867000  | -2.285466000 | 0.714610000  |
| C | 5.206529000  | -1.414615000 | 0.347189000  |
| H | 5.754092000  | -2.296865000 | 0.659433000  |
| C | 5.898933000  | -0.277411000 | -0.098648000 |
| H | 6.983117000  | -0.279407000 | -0.132172000 |
| C | 5.187197000  | 0.858822000  | -0.512740000 |
| H | 5.718389000  | 1.731396000  | -0.875989000 |
| C | 3.786922000  | 0.865757000  | -0.469268000 |
| H | 3.258790000  | 1.742582000  | -0.832455000 |
| C | 1.599177000  | -0.338926000 | 0.051805000  |
| C | -0.456433000 | 1.140216000  | 0.125920000  |
| C | -2.661825000 | -0.055650000 | 0.002700000  |
| C | -3.593123000 | 0.992862000  | 0.035038000  |
| H | -3.248036000 | 2.013412000  | 0.111206000  |
| C | -4.968910000 | 0.714976000  | -0.030874000 |
| H | -5.673712000 | 1.538194000  | -0.005373000 |
| C | -5.430822000 | -0.601544000 | -0.128212000 |
| H | -6.493517000 | -0.809904000 | -0.180321000 |
| C | -4.508999000 | -1.660463000 | -0.159078000 |
| H | -4.852784000 | -2.688467000 | -0.234323000 |

|   |              |              |              |
|---|--------------|--------------|--------------|
| C | -3.144256000 | -1.382849000 | -0.093310000 |
| H | -2.503409000 | -3.269869000 | -0.185588000 |
| H | 1.476073000  | 1.720523000  | 0.236368000  |
| H | -0.766528000 | -0.860863000 | 0.035197000  |
| N | 0.932237000  | 0.873102000  | 0.134865000  |
| N | -1.248877000 | 0.050862000  | 0.056482000  |
| O | -2.159675000 | -2.365181000 | -0.116037000 |
| O | 0.988800000  | -1.434463000 | 0.045115000  |
| S | -0.887950000 | 2.794702000  | 0.202316000  |

Z-matrix of the Ligand C3

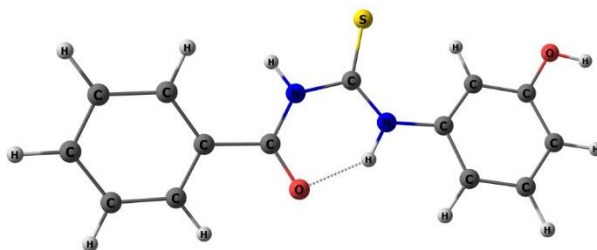

|   |              |              |              |
|---|--------------|--------------|--------------|
| C | 3.316521000  | -0.272441000 | -0.013162000 |
| C | 3.943287000  | 0.904745000  | -0.464467000 |
| H | 3.364495000  | 1.750675000  | -0.823822000 |
| C | 5.341206000  | 0.981169000  | -0.504959000 |
| H | 5.820670000  | 1.885446000  | -0.862385000 |
| C | 6.118106000  | -0.113545000 | -0.095692000 |
| H | 7.200474000  | -0.050312000 | -0.126593000 |
| C | 5.494288000  | -1.292670000 | 0.342161000  |
| H | 6.093081000  | -2.142193000 | 0.650888000  |
| C | 4.097787000  | -1.374515000 | 0.377661000  |
| H | 3.598125000  | -2.280901000 | 0.700682000  |
| C | 1.832389000  | -0.426798000 | 0.045314000  |
| C | -0.312853000 | 0.919950000  | 0.122326000  |
| C | -2.411883000 | -0.483371000 | -0.014704000 |
| C | -3.409758000 | 0.497645000  | 0.042298000  |

|   |              |              |              |
|---|--------------|--------------|--------------|
| H | -3.176998000 | 1.547688000  | 0.140679000  |
| C | -4.753202000 | 0.100550000  | -0.029850000 |
| C | -5.119963000 | -1.245827000 | -0.156005000 |
| H | -6.165443000 | -1.536045000 | -0.211917000 |
| C | -4.106864000 | -2.215669000 | -0.210121000 |
| H | -4.370942000 | -3.262694000 | -0.308969000 |
| C | -2.763920000 | -1.847722000 | -0.140883000 |
| H | -1.988408000 | -2.606095000 | -0.185875000 |
| N | 1.094261000  | 0.740561000  | 0.134085000  |
| N | -1.016009000 | -0.231554000 | 0.048685000  |
| O | 1.286604000  | -1.560719000 | 0.030051000  |
| O | -5.691713000 | 1.123938000  | 0.032451000  |
| S | -0.863749000 | 2.531133000  | 0.199766000  |
| H | -6.605664000 | 0.796027000  | -0.018921000 |
| H | 1.585245000  | 1.619180000  | 0.239995000  |
| H | -0.432376000 | -1.076710000 | 0.031075000  |

Z-matrix of the Ligand C1.F

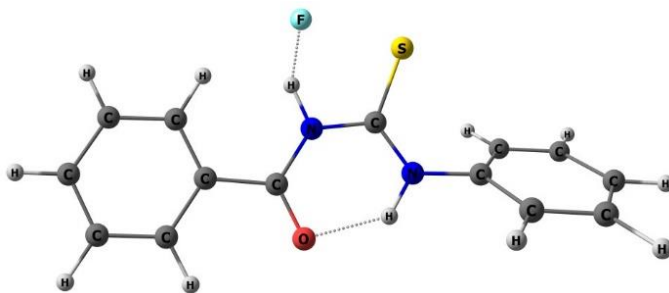

|   |              |              |              |
|---|--------------|--------------|--------------|
| C | -5.741675000 | -0.414017000 | -0.013436000 |
| C | -4.982123000 | 0.757740000  | 0.127165000  |
| C | -3.583197000 | 0.700945000  | 0.104802000  |
| C | -2.939016000 | -0.542434000 | -0.060218000 |
| C | -3.703540000 | -1.716423000 | -0.199100000 |
| C | -5.100246000 | -1.652499000 | -0.176505000 |
| C | -1.458224000 | -0.687432000 | -0.090254000 |

|   |              |              |              |
|---|--------------|--------------|--------------|
| N | -0.718118000 | 0.483307000  | -0.009257000 |
| C | 0.646243000  | 0.594031000  | 0.014475000  |
| N | 1.403530000  | -0.506063000 | -0.086262000 |
| C | 2.837277000  | -0.556578000 | -0.064903000 |
| C | 3.602514000  | 0.210141000  | -0.956364000 |
| C | 4.999823000  | 0.112155000  | -0.920973000 |
| C | 5.626996000  | -0.759029000 | -0.017024000 |
| C | 4.851840000  | -1.536299000 | 0.857302000  |
| C | 3.454497000  | -1.433686000 | 0.838951000  |
| O | -0.892512000 | -1.809457000 | -0.181813000 |
| S | 1.285167000  | 2.222825000  | 0.215971000  |
| H | -6.825148000 | -0.361853000 | 0.005232000  |
| H | -5.475803000 | 1.714244000  | 0.255508000  |
| H | -3.028157000 | 1.626665000  | 0.222059000  |
| H | -3.188097000 | -2.662356000 | -0.322528000 |
| H | -5.684922000 | -2.559237000 | -0.284471000 |
| H | -1.148215000 | 1.445343000  | 0.080866000  |
| H | 0.874920000  | -1.385978000 | -0.149681000 |
| H | 3.116298000  | 0.864613000  | -1.670887000 |
| H | 5.594924000  | 0.708635000  | -1.603313000 |
| H | 6.708551000  | -0.834651000 | 0.003308000  |
| H | 5.331399000  | -2.212790000 | 1.555899000  |
| H | 2.847308000  | -2.018489000 | 1.521941000  |
| F | -0.934504000 | 2.920656000  | 0.265572000  |

### Z-matrix of the Ligand C2.F

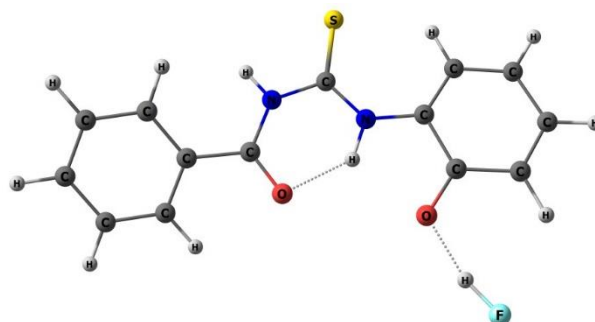

|   |              |              |              |
|---|--------------|--------------|--------------|
| C | -3.270912000 | -0.318288000 | 0.010571000  |
| C | -3.851746000 | -1.542321000 | -0.367389000 |
| H | -3.203804000 | -2.352152000 | -0.683738000 |
| C | -5.241132000 | -1.701267000 | -0.326272000 |
| H | -5.685794000 | -2.644136000 | -0.623680000 |
| C | -6.057136000 | -0.642492000 | 0.103028000  |
| H | -7.133966000 | -0.767027000 | 0.138538000  |
| C | -5.479491000 | 0.573676000  | 0.499296000  |
| H | -6.107120000 | 1.385056000  | 0.850094000  |
| C | -4.089613000 | 0.738393000  | 0.453744000  |
| H | -3.665648000 | 1.674914000  | 0.805046000  |
| C | -1.783537000 | -0.222192000 | -0.054813000 |
| C | 0.093983000  | 1.472669000  | -0.122168000 |
| C | 2.395264000  | 0.495969000  | -0.007023000 |
| C | 3.229756000  | 1.621453000  | 0.009815000  |
| H | 2.806126000  | 2.613743000  | -0.027325000 |
| C | 4.620511000  | 1.448831000  | 0.074077000  |
| H | 5.253534000  | 2.329528000  | 0.087340000  |
| C | 5.221993000  | 0.158650000  | 0.122260000  |
| H | 6.300943000  | 0.071083000  | 0.172654000  |
| C | 4.433069000  | -0.971728000 | 0.105143000  |
| H | 4.846410000  | -1.974080000 | 0.139639000  |
| C | 2.996209000  | -0.843734000 | 0.039134000  |

|   |              |              |              |
|---|--------------|--------------|--------------|
| H | 2.908353000  | -3.289799000 | 0.063008000  |
| H | -1.887795000 | 1.842887000  | -0.224173000 |
| H | 0.619318000  | -0.503755000 | -0.055569000 |
| N | -1.249900000 | 1.063112000  | -0.129605000 |
| N | 1.005024000  | 0.459711000  | -0.060507000 |
| O | 2.213942000  | -1.870015000 | 0.019050000  |
| O | -1.049262000 | -1.235737000 | -0.060148000 |
| S | 0.380612000  | 3.150067000  | -0.192460000 |
| F | 3.550336000  | -4.022976000 | 0.095631000  |

Z-matrix of the Ligand C3.F

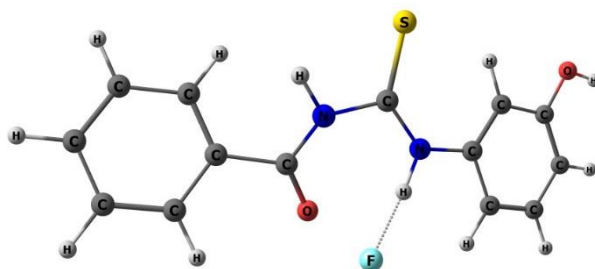

|   |              |              |              |
|---|--------------|--------------|--------------|
| C | 3.289230000  | 0.135483000  | -0.149639000 |
| C | 3.781376000  | -1.167605000 | -0.362564000 |
| H | 3.104057000  | -2.011641000 | -0.460184000 |
| C | 5.158342000  | -1.373389000 | -0.504312000 |
| H | 5.539284000  | -2.373322000 | -0.677154000 |
| C | 6.042739000  | -0.284491000 | -0.436115000 |
| H | 7.109172000  | -0.447961000 | -0.546709000 |
| C | 5.549733000  | 1.015351000  | -0.238252000 |
| H | 6.234103000  | 1.854690000  | -0.192895000 |
| C | 4.174047000  | 1.229082000  | -0.101186000 |
| H | 3.772652000  | 2.225353000  | 0.045915000  |
| C | 1.836783000  | 0.410535000  | 0.000549000  |
| C | -0.330735000 | -0.846912000 | 0.462783000  |
| C | -2.492014000 | 0.376493000  | 0.050430000  |
| C | -3.385170000 | -0.687135000 | -0.128745000 |

|   |              |              |              |
|---|--------------|--------------|--------------|
| H | -3.071948000 | -1.719030000 | -0.071318000 |
| C | -4.734203000 | -0.399247000 | -0.381833000 |
| C | -5.205669000 | 0.918086000  | -0.454695000 |
| H | -6.254612000 | 1.124173000  | -0.648885000 |
| C | -4.295014000 | 1.970526000  | -0.271219000 |
| H | -4.643131000 | 2.995888000  | -0.326262000 |
| C | -2.947936000 | 1.713088000  | -0.021950000 |
| H | -2.247804000 | 2.531033000  | 0.113377000  |
| N | 1.075912000  | -0.577903000 | 0.554698000  |
| N | -1.099123000 | 0.238686000  | 0.298628000  |
| O | 1.380469000  | 1.532835000  | -0.409740000 |
| O | -5.567161000 | -1.499018000 | -0.552696000 |
| S | -0.752172000 | -2.493456000 | 0.574037000  |
| H | -6.491078000 | -1.245772000 | -0.718981000 |
| H | 1.574083000  | -1.378441000 | 0.928085000  |
| H | -0.629722000 | 1.141728000  | 0.446065000  |
| F | 0.338516000  | 2.360379000  | 1.096783000  |

Z-matrix of the Ligand [Ni(C2)<sub>2</sub>]

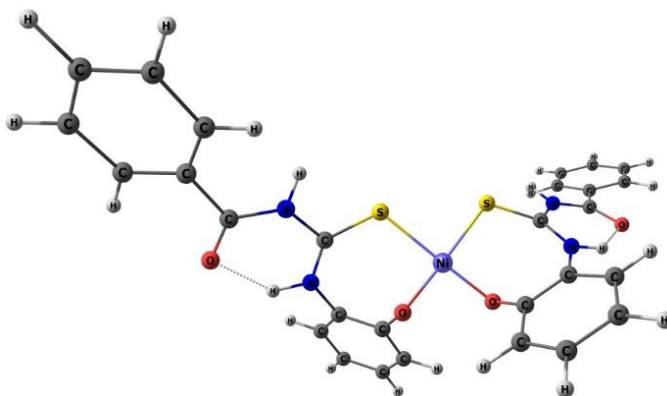

|   |             |              |              |
|---|-------------|--------------|--------------|
| C | 6.452574000 | -1.721063000 | 0.477097000  |
| C | 7.766549000 | -1.903639000 | 0.009873000  |
| H | 8.072354000 | -1.402564000 | -0.901724000 |
| C | 8.656071000 | -2.717091000 | 0.720014000  |
| H | 9.665990000 | -2.861339000 | 0.353171000  |



|   |              |              |              |
|---|--------------|--------------|--------------|
| C | 8.241524000  | -3.342451000 | 1.906728000  |
| H | 8.931514000  | -3.970602000 | 2.459555000  |
| C | 6.937320000  | -3.145646000 | 2.386346000  |
| H | 6.622344000  | -3.610910000 | 3.313377000  |
| C | 6.042074000  | -2.337379000 | 1.674864000  |
| H | 5.052609000  | -2.166866000 | 2.089449000  |
| C | 5.557075000  | -0.840257000 | -0.325816000 |
| C | 3.138025000  | -0.298801000 | -0.726120000 |
| C | 2.604763000  | 1.636532000  | -2.195587000 |
| C | 2.913383000  | 1.966055000  | -3.523759000 |
| H | 3.753979000  | 1.485585000  | -4.016658000 |
| C | 2.130442000  | 2.902737000  | -4.206059000 |
| H | 2.360329000  | 3.156829000  | -5.234677000 |
| C | 1.039013000  | 3.503373000  | -3.548079000 |
| H | 0.422623000  | 4.224059000  | -4.076145000 |
| C | 0.740216000  | 3.183092000  | -2.221507000 |
| H | -0.100681000 | 3.622814000  | -1.697051000 |
| C | 1.530085000  | 2.250848000  | -1.510573000 |
| H | 3.874063000  | -1.800848000 | 0.417881000  |
| H | 4.476997000  | 0.861042000  | -1.639139000 |
| N | 4.189672000  | -1.033111000 | -0.160879000 |
| N | 3.467797000  | 0.723965000  | -1.505677000 |
| O | 1.314001000  | 1.956969000  | -0.206300000 |
| O | 6.004974000  | 0.022124000  | -1.119815000 |
| S | 1.562777000  | -0.977243000 | -0.371040000 |
| C | -6.452584000 | -1.721039000 | -0.477151000 |
| C | -7.766583000 | -1.903592000 | -0.009983000 |
| H | -8.072393000 | -1.402573000 | 0.901642000  |
| C | -8.656116000 | -2.716953000 | -0.720215000 |
| H | -9.666054000 | -2.861184000 | -0.353417000 |
| C | -8.241555000 | -3.342245000 | -1.906961000 |
| H | -8.931554000 | -3.970326000 | -2.459857000 |

|    |              |              |              |
|----|--------------|--------------|--------------|
| C  | -6.937326000 | -3.145464000 | -2.386519000 |
| H  | -6.622339000 | -3.610676000 | -3.313572000 |
| C  | -6.042070000 | -2.337287000 | -1.674949000 |
| H  | -5.052585000 | -2.166788000 | -2.089488000 |
| C  | -5.557066000 | -0.840334000 | 0.325849000  |
| C  | -3.138017000 | -0.298893000 | 0.726135000  |
| C  | -2.604725000 | 1.636338000  | 2.195730000  |
| C  | -2.913292000 | 1.965829000  | 3.523923000  |
| H  | -3.753841000 | 1.485311000  | 4.016856000  |
| C  | -2.130363000 | 2.902536000  | 4.206201000  |
| H  | -2.360211000 | 3.156597000  | 5.234835000  |
| C  | -1.038993000 | 3.503236000  | 3.548178000  |
| H  | -0.422607000 | 4.223937000  | 4.076228000  |
| C  | -0.740251000 | 3.183000000  | 2.221583000  |
| H  | 0.100601000  | 3.622768000  | 1.697095000  |
| C  | -1.530116000 | 2.250737000  | 1.510665000  |
| H  | -3.874059000 | -1.800900000 | -0.417905000 |
| H  | -4.476961000 | 0.860793000  | 1.639342000  |
| N  | -4.189665000 | -1.033143000 | 0.160828000  |
| N  | -3.467757000 | 0.723759000  | 1.505845000  |
| O  | -1.314106000 | 1.956913000  | 0.206368000  |
| O  | -6.004943000 | 0.021962000  | 1.119954000  |
| S  | -1.562759000 | -0.977291000 | 0.370902000  |
| Ni | -0.000018000 | 0.686831000  | 0.000017000  |

Z-matrix of the Ligand [Cu(C2)2]

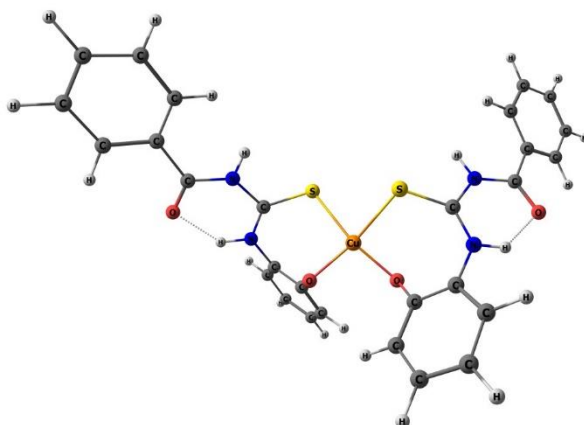

|   |              |              |              |
|---|--------------|--------------|--------------|
| C | -5.969826000 | -2.213077000 | -0.585624000 |
| C | -7.239526000 | -1.994017000 | -1.149620000 |
| H | -7.676640000 | -1.003889000 | -1.085628000 |
| C | -7.918307000 | -3.043479000 | -1.778446000 |
| H | -8.893214000 | -2.868764000 | -2.219157000 |
| C | -7.337516000 | -4.320240000 | -1.838377000 |
| H | -7.863513000 | -5.134323000 | -2.325096000 |
| C | -6.079247000 | -4.546921000 | -1.259528000 |
| H | -5.636588000 | -5.536024000 | -1.289320000 |
| C | -5.394756000 | -3.497713000 | -0.634147000 |
| H | -4.439978000 | -3.709883000 | -0.161559000 |
| C | -5.300799000 | -1.050125000 | 0.065398000  |
| C | -3.063069000 | -0.211301000 | 0.828327000  |
| C | -2.910569000 | 2.005973000  | 1.912524000  |
| C | -3.397569000 | 2.489435000  | 3.135615000  |
| H | -4.242157000 | 1.996611000  | 3.608613000  |
| C | -2.785163000 | 3.590422000  | 3.742601000  |
| H | -3.155051000 | 3.965297000  | 4.690260000  |
| C | -1.678998000 | 4.197575000  | 3.115607000  |
| H | -1.190383000 | 5.044155000  | 3.587568000  |
| C | -1.202716000 | 3.723550000  | 1.891652000  |
| H | -0.344888000 | 4.169924000  | 1.400981000  |

|   |              |              |              |
|---|--------------|--------------|--------------|
| C | -1.824150000 | 2.627267000  | 1.247516000  |
| H | -3.431117000 | -1.922170000 | -0.186424000 |
| H | -4.609312000 | 1.015717000  | 1.139047000  |
| N | -3.919685000 | -1.131466000 | 0.212873000  |
| N | -3.598043000 | 0.914228000  | 1.283991000  |
| O | -1.427382000 | 2.189208000  | 0.035063000  |
| O | -5.939282000 | -0.040765000 | 0.448506000  |
| S | -1.404154000 | -0.757658000 | 0.974849000  |
| C | 5.969719000  | -2.213246000 | 0.585556000  |
| C | 7.239375000  | -1.994255000 | 1.149670000  |
| H | 7.676547000  | -1.004149000 | 1.085721000  |
| C | 7.918029000  | -3.043760000 | 1.778559000  |
| H | 8.892904000  | -2.869108000 | 2.219367000  |
| C | 7.337157000  | -4.320488000 | 1.838435000  |
| H | 7.863061000  | -5.134602000 | 2.325201000  |
| C | 6.078931000  | -4.547095000 | 1.259464000  |
| H | 5.636215000  | -5.536174000 | 1.289217000  |
| C | 5.394566000  | -3.497845000 | 0.634017000  |
| H | 4.439811000  | -3.709927000 | 0.161344000  |
| C | 5.300784000  | -1.050293000 | -0.065547000 |
| C | 3.063057000  | -0.211367000 | -0.828433000 |
| C | 2.910700000  | 2.005964000  | -1.912512000 |
| C | 3.397821000  | 2.489572000  | -3.135497000 |
| H | 4.242415000  | 1.996758000  | -3.608497000 |
| C | 2.785520000  | 3.590674000  | -3.742374000 |
| H | 3.155494000  | 3.965663000  | -4.689954000 |
| C | 1.679357000  | 4.197809000  | -3.115356000 |
| H | 1.190828000  | 5.044492000  | -3.587222000 |
| C | 1.202980000  | 3.723641000  | -1.891495000 |
| H | 0.345174000  | 4.170014000  | -1.400788000 |
| C | 1.824302000  | 2.627225000  | -1.247471000 |
| H | 3.431093000  | -1.922290000 | 0.186279000  |

|    |              |              |              |
|----|--------------|--------------|--------------|
| H  | 4.609381000  | 1.015529000  | -1.139211000 |
| N  | 3.919656000  | -1.131578000 | -0.213017000 |
| N  | 3.598097000  | 0.914132000  | -1.284084000 |
| O  | 1.427455000  | 2.189099000  | -0.035072000 |
| O  | 5.939340000  | -0.041006000 | -0.448714000 |
| S  | 1.404105000  | -0.757648000 | -0.974926000 |
| Cu | -0.000036000 | 0.958594000  | 0.000027000  |
